# Supplementary material for: Out in the Cold: Identification of Genomic Regions Associated With Cold Tolerance in the Biocontrol Fungus Clonostachys rosea Through Genome-Wide Association Mapping
Source: Front Microbiol. 2018 Nov 22;9:2844. doi: 10.3389/fmicb.2018.02844 (PMC6262169; doi:10.3389/fmicb.2018.02844)
Supplement: Supplementary Table 4 — Significant GWAS analysis results based on PLINK and ashr. [file Table_4.xlsx]

## Sheet: Sheet1
Significant results of PLINK GWAS and ashr analysis.
SNP	betahat	sebetahat	NegativeProb	PositiveProb	lfsr	svalue	lfdr	qvalue	PosteriorMean	PosteriorSD	Location 1	Location 2	Location 3	Annotation	Gene Ontology category
unitig_630:6733	-0.03975	0.003897	1	0	-2.22045e-16	-2.22045e-16	1.32956e-21	1.33048e-22	-0.0357286	0.00227973	intergenic	CRV2G00019736(dist=3623),CRV2G00019737(dist=13766)	CRV2G00019736	Protein of unknown function	0
unitig_878:353	-0.02275	0.000433	1	0	0	-1.11022e-16	0	0	-0.02275	0.000433	intergenic	NONE(dist=NONE),NONE(dist=NONE)		#N/A	#N/A
unitig_760:385	-0.03025	0.001299	1	0	0	-7.40149e-17	9.6651e-117	4.86409e-118	-0.03025	0.001299	intergenic	NONE(dist=NONE),CRV2G00020684(dist=6578)	CRV2G00020684	Similar to FRQ Frequency clock protein (Trichoderma spinulosum)	GO:0005737;GO:0006355;GO:0005634;GO:0007623
unitig_47:563	-0.04433	0.004372	1	0	0	-5.55112e-17	8.5424e-21	3.05529e-22	-0.0372009	0.00344973	intergenic	NONE(dist=NONE),NONE(dist=NONE)		#N/A	#N/A
unitig_47:602	-0.04433	0.004372	1	0	0	-4.44089e-17	8.5424e-21	4.00206e-22	-0.0372009	0.00344973	intergenic	NONE(dist=NONE),NONE(dist=NONE)		#N/A	#N/A
unitig_793:2158	-0.03575	0.003897	1	0	0	-3.70074e-17	1.32381e-17	4.20811e-19	-0.0340456	0.00284584	intergenic	CRV2G00016485(dist=1475),CRV2G00016486(dist=9686)	CRV2G00016485	Protein of unknown function	0
unitig_793:2167	-0.03575	0.003897	1	0	0	-3.17207e-17	1.32381e-17	5.54325e-19	-0.0340456	0.00284584	intergenic	CRV2G00016485(dist=1484),CRV2G00016486(dist=9677)	CRV2G00016485	Protein of unknown function	0
unitig_298:2434	0.02775	0.000433	0	1	0	-2.77556e-17	0	0	0.02775	0.000433	intergenic	NONE(dist=NONE),NONE(dist=NONE)		#N/A	#N/A
unitig_298:2460	0.02775	0.000433	0	1	0	-2.46716e-17	0	0	0.02775	0.000433	intergenic	NONE(dist=NONE),NONE(dist=NONE)		#N/A	#N/A
unitig_280:2479	-0.0125	0.000866	1	0	0	-2.22045e-17	4.4034e-45	1.47288e-46	-0.0123812	0.000784818	intergenic	NONE(dist=NONE),NONE(dist=NONE)		#N/A	#N/A
unitig_345:10970	-0.01325	0.001299	1	0	0	-2.01859e-17	1.64111e-22	2.66079e-24	-0.0128174	0.00117823	intergenic	CRV2G00021787(dist=1241),NONE(dist=NONE)	CRV2G00021787	Protein of unknown function	GO:0005618;GO:0004252;GO:0016020
unitig_246:11272	-0.0255	0.001732	1	0	0	-1.85037e-17	3.52931e-46	1.02448e-47	-0.0254975	0.00173669	exonic	CRV2G00021642	CRV2G00021642	Similar to fmpE Nonribosomal peptide synthetase fmpE (Neosartorya fumigata (strain ATCC MYA-4609 / Af293 / CBS 101355 / FGSC A1100))	GO:0008152;GO:0003824
unitig_640:12334	-0.03575	0.003897	1	0	0	-1.70804e-17	1.32381e-17	6.85085e-19	-0.0340456	0.00284584	exonic	CRV2G00022020	CRV2G00022020	Protein of unknown function	GO:0000981;GO:0006351;GO:0006355;GO:0005634;GO:0003677;GO:0008270
unitig_640:12340	-0.03575	0.003897	1	0	0	-1.58603e-17	1.32381e-17	8.13177e-19	-0.0340456	0.00284584	exonic	CRV2G00022020	CRV2G00022020	Protein of unknown function	GO:0000981;GO:0006351;GO:0006355;GO:0005634;GO:0003677;GO:0008270
unitig_818:85374	-0.03517	0.003712	1	0	0	-1.4803e-17	7.79935e-19	1.17331e-20	-0.0338546	0.0028384	intergenic	CRV2G00017605(dist=1606),CRV2G00017606(dist=4194)	CRV2G00017605	Similar to bcsl1b Probable mitochondrial chaperone BCS1-B (Dictyostelium discoideum)	GO:0034551;GO:0017111;GO:0005524;GO:0000166
unitig_601:93320	-0.02825	0.002165	1	0	0	-1.38778e-17	3.53298e-36	7.21108e-38	-0.0282496	0.00216577	intergenic	CRV2G00019351(dist=7767),NONE(dist=NONE)	CRV2G00019351	Protein of unknown function	0
unitig_643:109199	-0.0165	0.000866	1	0	0	-1.30614e-17	2.82063e-78	8.81448e-80	-0.0164956	0.000864251	intergenic	CRV2G00019327(dist=50251),NONE(dist=NONE)	CRV2G00019327	Similar to betA Oxygen-dependent choline dehydrogenase (Burkholderia multivorans (strain ATCC 17616 / 249))	GO:0055114;GO:0050660;GO:0006066;GO:0016614;GO:0008812
unitig_697:153157	-0.051	0.001732	1	0	0	-1.23358e-17	2.00018e-185	1.5386e-186	-0.051	0.001732	upstream	CRV2G00018410(dist=872)	CRV2G00018410	Protein of unknown function	0
unitig_823:628705	-0.033	0.000866	1	0	0	-1.16866e-17	3.99959032852704e-314	3.3329919404392e-315	-0.033	0.000866	intergenic	CRV2G00015724(dist=3408),NONE(dist=NONE)	CRV2G00015724	Similar to FUS6 Efflux pump FUS6 (Gibberella moniliformis (strain M3125 / FGSC 7600))	GO:0055085;GO:0016021
scf_014:970797	-0.0395	0.003464	1	0	0	-1.11022e-17	3.32698e-27	8.04082e-29	-0.0359775	0.00203113	intergenic	CRV2G00012293(dist=2794),CRV2G00012294(dist=27696)	CRV2G00012293	Protein of unknown function	GO:0005975;GO:0003824
scf_014:972515	-0.0395	0.003464	1	0	0	-1.05736e-17	3.32698e-27	1.35435e-28	-0.0359775	0.00203113	intergenic	CRV2G00012293(dist=4512),CRV2G00012294(dist=25978)	CRV2G00012293	Protein of unknown function	GO:0005975;GO:0003824
scf_014:972522	-0.0395	0.003464	1	0	0	-1.00929e-17	3.32698e-27	1.88627e-28	-0.0359775	0.00203113	intergenic	CRV2G00012293(dist=4519),CRV2G00012294(dist=25971)	CRV2G00012293	Protein of unknown function	GO:0005975;GO:0003824
scf_014:976451	-0.04175	0.00301	1	0	0	-9.65411e-18	3.07613e-40	9.42575e-42	-0.037155	0.00204938	intergenic	CRV2G00012293(dist=8448),CRV2G00012294(dist=22042)	CRV2G00012293	Protein of unknown function	GO:0005975;GO:0003824
scf_014:979040	-0.0385	0.002574	1	0	0	-9.25186e-18	1.58816e-47	4.53759e-49	-0.036313	0.00157184	intergenic	CRV2G00012293(dist=11037),CRV2G00012294(dist=19453)	CRV2G00012293	Protein of unknown function	GO:0005975;GO:0003824
scf_014:980555	-0.04475	0.004763	1	0	0	-8.88178e-18	1.07729e-17	1.45171e-19	-0.0370328	0.0036852	intergenic	CRV2G00012293(dist=12552),CRV2G00012294(dist=17938)	CRV2G00012293	Protein of unknown function	GO:0005975;GO:0003824
scf_014:986967	-0.035	0.002517	1	0	0	-8.54018e-18	3.25628e-41	1.07125e-42	-0.0345115	0.00212769	intergenic	CRV2G00012293(dist=18964),CRV2G00012294(dist=11526)	CRV2G00012293	Protein of unknown function	GO:0005975;GO:0003824
scf_014:987451	-0.035	0.002517	1	0	0	-8.22387e-18	3.25628e-41	1.77106e-42	-0.0345115	0.00212769	intergenic	CRV2G00012293(dist=19448),CRV2G00012294(dist=11042)	CRV2G00012293	Protein of unknown function	GO:0005975;GO:0003824
scf_014:992683	-0.03883	0.003283	1	0	0	-7.93016e-18	2.12417e-29	4.74473e-31	-0.0358819	0.00197651	intergenic	CRV2G00012293(dist=24680),CRV2G00012294(dist=5810)	CRV2G00012293	Protein of unknown function	GO:0005975;GO:0003824
scf_014:994962	-0.03725	0.001299	1	0	0	-7.65671e-18	1.95937e-177	1.39955e-178	-0.0367463	0.000974035	intergenic	CRV2G00012293(dist=26959),CRV2G00012294(dist=3531)	CRV2G00012293	Protein of unknown function	GO:0005975;GO:0003824
scf_014:995026	-0.03725	0.001299	1	0	0	-7.40149e-18	1.95937e-177	2.6125e-178	-0.0367463	0.000974035	intergenic	CRV2G00012293(dist=27023),CRV2G00012294(dist=3467)	CRV2G00012293	Protein of unknown function	GO:0005975;GO:0003824
scf_014:997295	-0.066	0.005196	1	0	0	-7.16273e-18	1.19219e-32	2.37001e-34	-0.0657166	0.00489572	intergenic	CRV2G00012293(dist=29292),CRV2G00012294(dist=1198)	CRV2G00012293	Protein of unknown function	GO:0005975;GO:0003824
scf_014:997808	-0.06625	0.005629	1	0	0	-6.93889e-18	1.00805e-27	2.34509e-29	-0.0657948	0.00518456	downstream	CRV2G00012294(dist=685)	CRV2G00012294	Protein of unknown function	0
scf_014:997879	-0.06925	0.000433	1	0	0	-6.72862e-18	0	0	-0.06925	0.000433	downstream	CRV2G00012294(dist=614)	CRV2G00012294	Protein of unknown function	0
scf_014:997904	-0.06925	0.000433	1	0	0	-6.53072e-18	0	0	-0.06925	0.000433	downstream	CRV2G00012294(dist=589)	CRV2G00012294	Protein of unknown function	0
scf_014:997927	-0.06925	0.000433	1	0	0	-6.34413e-18	0	0	-0.06925	0.000433	downstream	CRV2G00012294(dist=566)	CRV2G00012294	Protein of unknown function	0
scf_014:997940	-0.06925	0.000433	1	0	0	-6.16791e-18	0	0	-0.06925	0.000433	downstream	CRV2G00012294(dist=553)	CRV2G00012294	Protein of unknown function	0
scf_014:997977	-0.06925	0.000433	1	0	0	-6.00121e-18	0	0	-0.06925	0.000433	downstream	CRV2G00012294(dist=516)	CRV2G00012294	Protein of unknown function	0
scf_014:1001686	-0.035	0.002517	1	0	0	-5.84328e-18	3.25628e-41	2.44045e-42	-0.0345115	0.00212769	intergenic	CRV2G00012294(dist=2803),CRV2G00012295(dist=10964)	CRV2G00012294	Protein of unknown function	0
scf_014:1002874	-0.03625	0.000433	1	0	0	-5.69345e-18	0	0	-0.03625	0.000432987	intergenic	CRV2G00012294(dist=3991),CRV2G00012295(dist=9776)	CRV2G00012294	Protein of unknown function	0
scf_014:1002922	-0.035	0.002517	1	0	0	-5.55112e-18	3.25628e-41	3.08135e-42	-0.0345115	0.00212769	intergenic	CRV2G00012294(dist=4039),CRV2G00012295(dist=9728)	CRV2G00012294	Protein of unknown function	0
scf_014:1008590	-0.03562	0.002431	1	0	0	-5.41572e-18	8.24743e-46	3.22582e-47	-0.0349873	0.00196699	intergenic	CRV2G00012294(dist=9707),CRV2G00012295(dist=4060)	CRV2G00012294	Protein of unknown function	0
unitig_821:1882326	-0.04683	0.003283	1	0	0	-5.28678e-18	9.41275e-42	3.38889e-43	-0.044113	0.00517774	intergenic	CRV2G00008512(dist=15461),CRV2G00008513(dist=10788)	CRV2G00008512	Similar to CHS8 Chitin synthase 8 (Ustilago maydis (strain 521 / FGSC 9021))	GO:0016758
unitig_821:2377208	-0.0375	0.001732	1	0	0	-5.16383e-18	1.0041e-100	4.78145e-102	-0.0365534	0.00119547	upstream	CRV2G00008668,CRV2G00008669(dist=996)	CRV2G00008668	Protein of unknown function	0
unitig_821:2379708	-0.0375	0.001732	1	0	0	-5.04647e-18	1.0041e-100	9.12822e-102	-0.0365534	0.00119547	exonic	CRV2G00008671	CRV2G00008671	Protein of unknown function	0
unitig_821:2379888	-0.0375	0.001732	1	0	0	-4.93432e-18	1.0041e-100	1.3097e-101	-0.0365534	0.00119547	exonic	CRV2G00008671	CRV2G00008671	Protein of unknown function	0
unitig_821:2379930	-0.0375	0.001732	1	0	0	-4.82706e-18	1.0041e-100	1.67351e-101	-0.0365534	0.00119547	intronic	CRV2G00008671	CRV2G00008671	Protein of unknown function	0
unitig_821:2380625	-0.0375	0.001732	1	0	0	-4.72435e-18	1.0041e-100	2.00821e-101	-0.0365534	0.00119547	UTR5	CRV2G00008671(CRV2T00008671_1:c.-87G>T)	CRV2G00008671	Protein of unknown function	0
unitig_821:2381152	-0.0375	0.001732	1	0	0	-4.62593e-18	1.0041e-100	2.31716e-101	-0.0365534	0.00119547	upstream	CRV2G00008671,CRV2G00008672(dist=835)	CRV2G00008671	Protein of unknown function	0
unitig_821:2382064	-0.0375	0.001732	1	0	0	-4.53152e-18	1.0041e-100	2.60323e-101	-0.0365534	0.00119547	exonic	CRV2G00008672	CRV2G00008672	Similar to bcsl1b Probable mitochondrial chaperone BCS1-B (Dictyostelium discoideum)	GO:0034551;GO:0017111;GO:0005524;GO:0000166
unitig_821:2382403	-0.0375	0.001732	1	0	0	-4.44089e-18	1.0041e-100	2.86887e-101	-0.0365534	0.00119547	exonic	CRV2G00008672	CRV2G00008672	Similar to bcsl1b Probable mitochondrial chaperone BCS1-B (Dictyostelium discoideum)	GO:0034551;GO:0017111;GO:0005524;GO:0000166
unitig_821:2382462	-0.0375	0.001732	1	0	0	-4.35382e-18	1.0041e-100	3.11618e-101	-0.0365534	0.00119547	exonic	CRV2G00008672	CRV2G00008672	Similar to bcsl1b Probable mitochondrial chaperone BCS1-B (Dictyostelium discoideum)	GO:0034551;GO:0017111;GO:0005524;GO:0000166
unitig_821:2382488	-0.0375	0.001732	1	0	0	-4.27009e-18	1.0041e-100	3.34701e-101	-0.0365534	0.00119547	exonic	CRV2G00008672	CRV2G00008672	Similar to bcsl1b Probable mitochondrial chaperone BCS1-B (Dictyostelium discoideum)	GO:0034551;GO:0017111;GO:0005524;GO:0000166
scf_004:2405658	-0.0165	0.001732	1	0	0	-4.18952e-18	1.82957e-19	3.19756e-21	-0.0160751	0.00177429	intergenic	CRV2G00010617(dist=5748),NONE(dist=NONE)	CRV2G00010617	Protein of unknown function	0
unitig_821:2411166	-0.03725	0.004121	1	0	0	-4.11194e-18	5.28456e-17	1.86488e-18	-0.0345983	0.00272193	exonic	CRV2G00008681	CRV2G00008681	Similar to het-s Heterokaryon incompatibility protein s (Podospora anserina)	0
unitig_821:2412834	-0.0395	0.003464	1	0	0	-4.03717e-18	3.32698e-27	2.40076e-28	-0.0359775	0.00203113	upstream	CRV2G00008682,CRV2G00008683(dist=90)	CRV2G00008682	Protein of unknown function	0
unitig_821:2413524	-0.0395	0.003464	1	0	0	-3.96508e-18	3.32698e-27	2.89864e-28	-0.0359775	0.00203113	intronic	CRV2G00008683	CRV2G00008683	Protein of unknown function	0
unitig_821:2413553	-0.0395	0.003464	1	0	0	-3.89552e-18	3.32698e-27	3.38072e-28	-0.0359775	0.00203113	exonic	CRV2G00008683	CRV2G00008683	Protein of unknown function	0
unitig_821:2413587	-0.0395	0.003464	1	0	0	-3.82836e-18	3.32698e-27	3.84774e-28	-0.0359775	0.00203113	exonic	CRV2G00008683	CRV2G00008683	Protein of unknown function	0
unitig_821:2413770	-0.0395	0.003464	1	0	0	-3.76347e-18	3.32698e-27	4.30039e-28	-0.0359775	0.00203113	exonic	CRV2G00008683	CRV2G00008683	Protein of unknown function	0
unitig_821:2413908	-0.0395	0.003464	1	0	0	-3.70074e-18	3.32698e-27	4.73932e-28	-0.0359775	0.00203113	downstream	CRV2G00008682,CRV2G00008683(dist=80)	CRV2G00008682	Protein of unknown function	0
scf_022:3435287	-0.056	0.00535	1	0	0	-3.64008e-18	1.90714e-21	1.54168e-22	-0.0552596	0.00641802	intergenic	CRV2G00005838(dist=12140),CRV2G00005839(dist=25309)	CRV2G00005838	Protein of unknown function	GO:0016772
unitig_41:218194	0.05125	0.002165	0	1	6.30792e-119	-3.58136e-18	6.30792e-119	3.31996e-120	0.05125	0.00216505	intergenic	CRV2G00016392(dist=11702),CRV2G00016393(dist=24205)	CRV2G00016392	Similar to ARB_01230 Kelch repeat-containing protein ARB_01230 (Arthroderma benhamiae (strain ATCC MYA-4681 / CBS 112371))	GO:0005515
unitig_152:94108	0.04525	0.002165	0	1	3.99403e-92	-3.52452e-18	3.99403e-92	1.2884e-93	0.0448726	0.00268335	intergenic	CRV2G00019481(dist=26846),NONE(dist=NONE)	CRV2G00019481	Similar to ANK1 Ankyrin-1 (Homo sapiens)	GO:0005515;GO:0008270
unitig_339:3840	0.016	0.000866	0	1	1.42505e-73	-3.46945e-18	1.42505e-73	4.3184e-75	0.0159903	0.000878432	intergenic	NONE(dist=NONE),NONE(dist=NONE)		#N/A	#N/A
unitig_389:6135	0.008	0.0005	0	1	3.12304e-55	-3.41607e-18	3.12304e-55	9.18542e-57	0.00799998	0.00049997	upstream	CRV2G00021494(dist=980)	CRV2G00021494	Protein of unknown function	0
scf_014:596442	0.0125	0.000866	0	1	4.4034e-45	-3.36431e-18	4.4034e-45	2.56419e-46	0.0123812	0.000784818	exonic	CRV2G00012196	CRV2G00012196	Similar to NMA111 Pro-apoptotic serine protease NMA111 (Magnaporthe oryzae (strain 70-15 / ATCC MYA-4617 / FGSC 8958))	GO:0006508;GO:0005515;GO:0004252;GO:0003824
unitig_455:6266	0.00625	0.000433	0	1	8.03685e-45	-3.3141e-18	8.03685e-45	4.5093e-46	0.00625	0.000433	intergenic	NONE(dist=NONE),NONE(dist=NONE)		#N/A	#N/A
unitig_261:114272	0.0365	0.002598	0	1	5.08611e-42	-3.26536e-18	5.08611e-42	1.22845e-43	0.0353971	0.00190896	downstream	CRV2G00018997,CRV2G00018998(dist=816)	CRV2G00018997	Protein of unknown function	GO:0004553;GO:0005975
unitig_267:2	0.0565	0.00433	0	1	1.61491e-34	-3.21804e-18	1.61491e-34	3.3005e-36	0.056479	0.00437379	upstream	CRV2G00021630(dist=130)	CRV2G00021630	Similar to SPAC32A11.02c Uncharacterized protein C32A11.02c (Schizosaccharomyces pombe (strain 972 / ATCC 24843))	0
scf_022:3435239	0.05075	0.003897	0	1	2.37095e-34	-3.17207e-18	2.37095e-34	7.88471e-36	0.0499981	0.00490384	intergenic	CRV2G00005838(dist=12092),CRV2G00005839(dist=25357)	CRV2G00005838	Protein of unknown function	GO:0016772
unitig_244:13798	0.0405	0.003354	0	1	1.82084e-30	-3.12739e-18	1.82084e-30	3.4588e-32	0.0364006	0.00195466	exonic	CRV2G00021732	CRV2G00021732	Protein of unknown function	0
unitig_47:10524	0.049	0.00433	0	1	1.49693e-25	-3.08395e-18	1.49693e-25	2.70108e-27	0.0445452	0.00685264	intergenic	NONE(dist=NONE),NONE(dist=NONE)		#N/A	#N/A
unitig_226:14164	0.028	0.002598	0	1	1.65205e-24	-3.04171e-18	1.65205e-24	2.69563e-26	0.0279896	0.00261402	intergenic	NONE(dist=NONE),NONE(dist=NONE)		#N/A	#N/A
unitig_54:12601	0.01375	0.001299	0	1	3.45398e-24	-3.0006e-18	3.45398e-24	7.66233e-26	0.0132513	0.00124829	UTR3	CRV2G00021605(CRV2T00021605_1:c.*597C>A)	CRV2G00021605	Protein of unknown function	0
unitig_54:12944	0.01375	0.001299	0	1	3.45398e-24	-2.96059e-18	3.45398e-24	1.24871e-25	0.0132513	0.00124829	UTR3	CRV2G00021605(CRV2T00021605_1:c.*254C>T)	CRV2G00021605	Protein of unknown function	0
unitig_103:3991	0.05083	0.004667	0	1	1.87255e-23	-2.92164e-18	1.87255e-23	3.86852e-25	0.0475025	0.00725894	exonic	CRV2G00021370	CRV2G00021370	Similar to HET-E1 Vegetative incompatibility protein HET-E-1 (Podospora anserina)	0
unitig_210:6556	0.02225	0.002165	0	1	3.08919e-22	-2.88369e-18	3.08919e-22	6.85611e-24	0.0214378	0.00256691	upstream	CRV2G00022115(dist=164)	CRV2G00022115	Protein of unknown function	0
scf_014:971722	0.03975	0.003897	0	1	1.32956e-21	-2.8467e-18	1.32956e-21	3.98126e-23	0.0357286	0.00227973	intergenic	CRV2G00012293(dist=3719),CRV2G00012294(dist=26771)	CRV2G00012293	Protein of unknown function	GO:0005975;GO:0003824
scf_014:975572	0.03975	0.003897	0	1	1.32956e-21	-2.81065e-18	1.32956e-21	5.63479e-23	0.0357286	0.00227973	intergenic	CRV2G00012293(dist=7569),CRV2G00012294(dist=22921)	CRV2G00012293	Protein of unknown function	GO:0005975;GO:0003824
scf_014:975785	0.03975	0.003897	0	1	1.32956e-21	-2.7755e-18	1.32956e-21	7.24646e-23	0.0357286	0.00227973	intergenic	CRV2G00012293(dist=7782),CRV2G00012294(dist=22708)	CRV2G00012293	Protein of unknown function	GO:0005975;GO:0003824
scf_014:976180	0.03975	0.003897	0	1	1.32956e-21	-2.74122e-18	1.32956e-21	8.81783e-23	0.0357286	0.00227973	intergenic	CRV2G00012293(dist=8177),CRV2G00012294(dist=22313)	CRV2G00012293	Protein of unknown function	GO:0005975;GO:0003824
scf_014:976427	0.03975	0.003897	0	1	1.32956e-21	-2.70778e-18	1.32956e-21	1.03504e-22	0.0357286	0.00227973	intergenic	CRV2G00012293(dist=8424),CRV2G00012294(dist=22066)	CRV2G00012293	Protein of unknown function	GO:0005975;GO:0003824
scf_014:978256	0.03975	0.003897	0	1	1.32956e-21	-2.67514e-18	1.32956e-21	1.18456e-22	0.0357286	0.00227973	intergenic	CRV2G00012293(dist=10253),CRV2G00012294(dist=20237)	CRV2G00012293	Protein of unknown function	GO:0005975;GO:0003824
unitig_284:9499	0.02125	0.002165	0	1	2.58573e-20	-2.64298e-18	2.58573e-20	6.89491e-22	0.0200915	0.00242219	UTR3	CRV2G00020539(CRV2T00020539_1:c.*381C>T)	CRV2G00020539	Protein of unknown function	0
scf_014:982249	0.03825	0.003897	0	1	4.41481e-20	-2.61137e-18	4.41481e-20	1.17779e-21	0.0351851	0.00243068	intergenic	CRV2G00012293(dist=14246),CRV2G00012294(dist=16244)	CRV2G00012293	Protein of unknown function	GO:0005975;GO:0003824
unitig_168:1553	0.02025	0.002165	0	1	1.6603e-18	-2.5617e-18	1.6603e-18	2.96523e-20	0.0189703	0.00215676	downstream	CRV2G00021891(dist=139)	CRV2G00021891	Protein of unknown function	0
unitig_823:625945	0.03575	0.003897	0	1	1.32381e-17	-2.38009e-18	1.32381e-17	2.84458e-19	0.0340456	0.00284584	upstream	CRV2G00015724(dist=648)	CRV2G00015724	Similar to FUS6 Efflux pump FUS6 (Gibberella moniliformis (strain M3125 / FGSC 7600))	GO:0055085;GO:0016021
unitig_125:4556	0.0155	0.001732	0	1	3.23186e-17	-1.98579e-18	3.23186e-17	1.35508e-18	0.0149473	0.00187332	UTR3	CRV2G00020755(CRV2T00020755_1:c.*54C>T)	CRV2G00020755	Protein of unknown function	0
unitig_793:978	-0.0355	0.003464	1	1.11022e-16	1.11022e-16	-7.16034e-19	4.11838e-22	1.23288e-23	-0.0342195	0.00262443	downstream	CRV2G00016485(dist=295)	CRV2G00016485	Protein of unknown function	0
unitig_793:2344	-0.0355	0.003464	1	1.11022e-16	1.11022e-16	5.25503e-19	4.11838e-22	1.76556e-23	-0.0342195	0.00262443	intergenic	CRV2G00016485(dist=1661),CRV2G00016486(dist=9500)	CRV2G00016485	Protein of unknown function	0
unitig_823:6016	-0.0225	5.4e-09	1	1.11022e-16	1.11022e-16	1.73975e-18	0	0	-0.0225	5.39042e-09	exonic	CRV2G00015476	CRV2G00015476	Similar to lamB Lactam utilization protein lamB (Emericella nidulans (strain FGSC A4 / ATCC 38163 / CBS 112.46 / NRRL 194 / M139))	GO:0005975;GO:0003824
unitig_793:6886	-0.0355	0.003464	1	1.11022e-16	1.11022e-16	2.92761e-18	4.11838e-22	2.28422e-23	-0.0342195	0.00262443	intergenic	CRV2G00016485(dist=6203),CRV2G00016486(dist=4958)	CRV2G00016485	Protein of unknown function	0
unitig_785:51502	-0.037	0.000866	1	1.11022e-16	1.11022e-16	4.08992e-18	0	0	-0.0368607	0.000749419	intergenic	CRV2G00019355(dist=14597),CRV2G00019356(dist=4098)	CRV2G00019355	Protein of unknown function	0
unitig_41:224415	-0.038	0.003786	1	1.11018e-16	1.11022e-16	5.22749e-18	4.78303e-21	2.08625e-22	-0.0351731	0.00239617	intergenic	CRV2G00016392(dist=17923),CRV2G00016393(dist=17984)	CRV2G00016392	Similar to ARB_01230 Kelch repeat-containing protein ARB_01230 (Arthroderma benhamiae (strain ATCC MYA-4681 / CBS 112371))	GO:0005515
unitig_41:228590	-0.03425	0.001299	1	1.11022e-16	1.11022e-16	6.34112e-18	6.08624e-150	3.8039e-151	-0.0342451	0.00129151	intergenic	CRV2G00016392(dist=22098),CRV2G00016393(dist=13809)	CRV2G00016392	Similar to ARB_01230 Kelch repeat-containing protein ARB_01230 (Arthroderma benhamiae (strain ATCC MYA-4681 / CBS 112371))	GO:0005515
unitig_1:437155	-0.0315	0.003464	1	8.75245e-17	1.11022e-16	7.43155e-18	2.34978e-17	1.04231e-18	-0.0312776	0.003257	intergenic	CRV2G00013600(dist=7873),CRV2G00013601(dist=32730)	CRV2G00013600	Similar to paxP Cytochrome P450 monooxygenase paxP (Penicillium paxilli)	GO:0016705;GO:0055114;GO:0020037;GO:0004497;GO:0005506
unitig_823:627905	-0.03425	0.001299	1	1.11022e-16	1.11022e-16	8.4995e-18	6.08624e-150	7.16028e-151	-0.0342451	0.00129151	intergenic	CRV2G00015724(dist=2608),NONE(dist=NONE)	CRV2G00015724	Similar to FUS6 Efflux pump FUS6 (Gibberella moniliformis (strain M3125 / FGSC 7600))	GO:0055085;GO:0016021
unitig_823:627941	-0.03425	0.001299	1	1.11022e-16	1.11022e-16	9.54565e-18	6.08624e-150	1.01437e-150	-0.0342451	0.00129151	intergenic	CRV2G00015724(dist=2644),NONE(dist=NONE)	CRV2G00015724	Similar to FUS6 Efflux pump FUS6 (Gibberella moniliformis (strain M3125 / FGSC 7600))	GO:0055085;GO:0016021
unitig_823:629825	-0.03975	0.003421	1	1.11022e-16	1.11022e-16	1.05707e-17	3.02552e-28	5.86872e-30	-0.036096	0.00199214	intergenic	CRV2G00015724(dist=4528),NONE(dist=NONE)	CRV2G00015724	Similar to FUS6 Efflux pump FUS6 (Gibberella moniliformis (strain M3125 / FGSC 7600))	GO:0055085;GO:0016021
scf_014:980161	-0.039	0.003251	1	1.11022e-16	1.11022e-16	1.15752e-17	3.02112e-30	8.98941e-32	-0.0359679	0.00193962	intergenic	CRV2G00012293(dist=12158),CRV2G00012294(dist=18332)	CRV2G00012293	Protein of unknown function	GO:0005975;GO:0003824
scf_001:2994180	-0.03933	0.002728	1	1.11022e-16	1.11022e-16	1.25598e-17	5.53431e-44	1.78976e-45	-0.0364879	0.00159361	upstream;downstream	CRV2G00004325(dist=945);CRV2G00004326(dist=87)	CRV2G00004325	Protein of unknown function	GO:0006338;GO:0016586;GO:0016514
unitig_821:1906397	0.03475	0.003897	0	1	1.22312e-16	1.36358e-17	1.22312e-16	3.04574e-18	0.0334767	0.00303231	intergenic	CRV2G00008514(dist=8103),CRV2G00008515(dist=7746)	CRV2G00008514	Protein of unknown function	0
unitig_821:1906436	0.03475	0.003897	0	1	1.22312e-16	1.46909e-17	1.22312e-16	4.20367e-18	0.0334767	0.00303231	intergenic	CRV2G00008514(dist=8142),CRV2G00008515(dist=7707)	CRV2G00008514	Protein of unknown function	0
unitig_821:1906445	0.03475	0.003897	0	1	1.22312e-16	1.57257e-17	1.22312e-16	5.33933e-18	0.0334767	0.00303231	intergenic	CRV2G00008514(dist=8151),CRV2G00008515(dist=7698)	CRV2G00008514	Protein of unknown function	0
unitig_196:82689	-0.0305	0.003464	1	2.63781e-17	3.33067e-16	1.8748e-17	3.06689e-16	1.07041e-17	-0.030363	0.00336554	upstream	CRV2G00019394(dist=642)	CRV2G00019394	Protein of unknown function	0
unitig_196:82694	-0.0305	0.003464	1	2.63781e-17	3.33067e-16	2.17133e-17	3.06689e-16	1.34704e-17	-0.030363	0.00336554	upstream	CRV2G00019394(dist=637)	CRV2G00019394	Protein of unknown function	0
scf_014:986202	-0.03688	0.004168	1	6.04063e-17	3.33067e-16	2.46232e-17	2.72661e-16	7.88525e-18	-0.0343968	0.00281349	intergenic	CRV2G00012293(dist=18199),CRV2G00012294(dist=12291)	CRV2G00012293	Protein of unknown function	GO:0005975;GO:0003824
unitig_821:2381258	-0.03967	0.004485	1	1.22184e-16	5.55112e-16	2.95351e-17	4.32928e-16	1.73542e-17	-0.0352459	0.00264536	upstream	CRV2G00008671,CRV2G00008672(dist=729)	CRV2G00008671	Protein of unknown function	0
unitig_821:2383387	-0.03967	0.004485	1	1.22184e-16	5.55112e-16	3.43569e-17	4.32928e-16	2.11668e-17	-0.0352459	0.00264536	exonic	CRV2G00008672	CRV2G00008672	Similar to bcsl1b Probable mitochondrial chaperone BCS1-B (Dictyostelium discoideum)	GO:0034551;GO:0017111;GO:0005524;GO:0000166
unitig_298:4690	0.02083	0.002404	0	1	8.24221e-16	4.15375e-17	8.24221e-16	2.84673e-17	0.0194115	0.00253446	intergenic	NONE(dist=NONE),NONE(dist=NONE)		#N/A	#N/A
unitig_823:634403	0.04183	0.00491	0	1	1.0613e-14	1.36776e-16	1.0613e-14	1.23824e-16	0.0356513	0.00287984	intergenic	CRV2G00015724(dist=9106),NONE(dist=NONE)	CRV2G00015724	Similar to FUS6 Efflux pump FUS6 (Gibberella moniliformis (strain M3125 / FGSC 7600))	GO:0055085;GO:0016021
unitig_823:634418	0.04183	0.00491	0	1	1.0613e-14	2.30314e-16	1.0613e-14	2.17477e-16	0.0356513	0.00287984	intergenic	CRV2G00015724(dist=9121),NONE(dist=NONE)	CRV2G00015724	Similar to FUS6 Efflux pump FUS6 (Gibberella moniliformis (strain M3125 / FGSC 7600))	GO:0055085;GO:0016021
unitig_192:8705	-0.0445	0.005196	1	4.68955e-16	1.37668e-14	3.50106e-16	1.32978e-14	3.33233e-16	-0.0364723	0.00361017	upstream	CRV2G00022109,CRV2G00022110(dist=489)	CRV2G00022109	Protein of unknown function	0
unitig_192:8713	-0.0445	0.005196	1	4.68955e-16	1.37668e-14	4.67796e-16	1.32978e-14	4.46957e-16	-0.0364723	0.00361017	upstream	CRV2G00022109,CRV2G00022110(dist=481)	CRV2G00022109	Protein of unknown function	0
unitig_192:8733	-0.0445	0.005196	1	4.68955e-16	1.37668e-14	5.83439e-16	1.32978e-14	5.58703e-16	-0.0364723	0.00361017	upstream	CRV2G00022109,CRV2G00022110(dist=461)	CRV2G00022109	Protein of unknown function	0
unitig_684:12151	0.02975	0.003579	0	1	1.99466e-14	7.50363e-16	1.99466e-14	7.2584e-16	0.0296053	0.00356036	intergenic	CRV2G00020420(dist=5735),NONE(dist=NONE)	CRV2G00020420	Protein of unknown function	0
unitig_41:226908	-0.036	0.00433	1	9.24737e-16	2.40918e-14	9.49862e-16	2.31671e-14	9.17646e-16	-0.0338503	0.00307405	intergenic	CRV2G00016392(dist=20416),CRV2G00016393(dist=15491)	CRV2G00016392	Similar to ARB_01230 Kelch repeat-containing protein ARB_01230 (Arthroderma benhamiae (strain ATCC MYA-4681 / CBS 112371))	GO:0005515
unitig_71:1897	0.0382	0.004595	0	1	3.02905e-14	1.19851e-15	3.02905e-14	1.16657e-15	0.034619	0.00287857	exonic	CRV2G00021992	CRV2G00021992	Protein of unknown function	GO:0055114;GO:0016491
unitig_821:2378042	-0.03925	0.004763	1	2.49284e-15	6.68354e-14	1.75008e-15	6.43426e-14	1.69746e-15	-0.0348807	0.00285755	upstream;downstream	CRV2G00008669(dist=162);CRV2G00008670(dist=162)	CRV2G00008669	Protein of unknown function	0
unitig_823:630265	0.03175	0.003897	2.75124e-15	1	7.7175e-14	2.37862e-15	7.44238e-14	2.30351e-15	0.0313139	0.00356717	intergenic	CRV2G00015724(dist=4968),NONE(dist=NONE)	CRV2G00015724	Similar to FUS6 Efflux pump FUS6 (Gibberella moniliformis (strain M3125 / FGSC 7600))	GO:0055085;GO:0016021
unitig_41:224435	-0.0375	0.004619	1	5.12751e-15	1.38667e-13	3.50497e-15	1.33539e-13	3.38811e-15	-0.0343153	0.00299983	intergenic	CRV2G00016392(dist=17943),CRV2G00016393(dist=17964)	CRV2G00016392	Similar to ARB_01230 Kelch repeat-containing protein ARB_01230 (Arthroderma benhamiae (strain ATCC MYA-4681 / CBS 112371))	GO:0005515
unitig_164:1894	0.05525	0.006495	0	1	1.40443e-13	4.62742e-15	1.40443e-13	5.60459e-15	0.0498472	0.0102321	intergenic	NONE(dist=NONE),NONE(dist=NONE)		#N/A	#N/A
unitig_164:1921	0.05525	0.006495	0	1	1.40443e-13	5.73161e-15	1.40443e-13	6.69199e-15	0.0498472	0.0102321	intergenic	NONE(dist=NONE),NONE(dist=NONE)		#N/A	#N/A
unitig_821:2372927	-0.035	0.00433	1	4.9249e-15	1.43885e-13	6.84575e-15	1.3896e-13	4.49935e-15	-0.0333145	0.00326565	exonic	CRV2G00008666	CRV2G00008666	Protein of unknown function	0
unitig_388:14509	-0.01025	0.001299	1	1.52077e-15	1.44329e-13	7.94562e-15	1.42808e-13	7.78092e-15	-0.0102306	0.00128274	upstream	CRV2G00021282(dist=328)	CRV2G00021282	Protein of unknown function	0
unitig_388:14514	-0.01025	0.001299	1	1.52077e-15	1.44329e-13	9.02802e-15	1.42808e-13	8.85257e-15	-0.0102306	0.00128274	upstream	CRV2G00021282(dist=333)	CRV2G00021282	Protein of unknown function	0
unitig_388:14573	-0.01025	0.001299	1	1.52077e-15	1.44329e-13	1.00934e-14	1.42808e-13	9.90734e-15	-0.0102306	0.00128274	upstream	CRV2G00021282(dist=392)	CRV2G00021282	Protein of unknown function	0
unitig_388:14609	-0.01025	0.001299	1	1.52077e-15	1.44329e-13	1.11421e-14	1.42808e-13	1.09456e-14	-0.0102306	0.00128274	upstream	CRV2G00021282(dist=428)	CRV2G00021282	Protein of unknown function	0
unitig_51:6887	0.05225	0.006226	0	1	2.56285e-13	1.30424e-14	2.56285e-13	1.28475e-14	0.0437926	0.00927011	UTR3	CRV2G00020982(CRV2T00020982_1:c.*863G>A)	CRV2G00020982	Protein of unknown function	GO:0016772
unitig_111:275299	-0.0275	0.003464	1	1.17689e-14	4.28546e-13	1.62386e-14	4.16777e-13	1.59546e-14	-0.0272457	0.0037244	intergenic	CRV2G00016026(dist=1800),CRV2G00016027(dist=10317)	CRV2G00016026	Protein of unknown function	0
unitig_595:88664	-0.013	0.001732	1	4.06686e-14	2.77056e-12	3.7264e-14	2.72989e-12	3.66717e-14	-0.0124517	0.00155648	intergenic	CRV2G00019144(dist=2363),CRV2G00019145(dist=4459)	CRV2G00019144	Protein of unknown function	0
unitig_47:654	-0.0065	0.000866	1	3.0566e-14	4.1267e-12	6.82445e-14	4.09613e-12	9.76696e-14	-0.00649999	0.000865985	intergenic	NONE(dist=NONE),NONE(dist=NONE)		#N/A	#N/A
unitig_339:3660	0.02975	0.003897	1.34392e-13	1	4.22432e-12	9.94932e-14	4.08993e-12	6.73782e-14	0.0294762	0.00390449	intergenic	NONE(dist=NONE),NONE(dist=NONE)		#N/A	#N/A
unitig_196:82598	-0.03233	0.004333	1	5.51621e-13	1.52568e-11	2.12607e-13	1.47052e-11	2.06681e-13	-0.0315275	0.00381893	upstream	CRV2G00019394(dist=733)	CRV2G00019394	Protein of unknown function	0
unitig_196:82612	-0.03233	0.004333	1	5.51621e-13	1.52568e-11	3.24046e-13	1.47052e-11	3.14077e-13	-0.0315275	0.00381893	upstream	CRV2G00019394(dist=719)	CRV2G00019394	Protein of unknown function	0
unitig_196:82619	-0.03233	0.004333	1	5.51621e-13	1.52568e-11	4.33845e-13	1.47052e-11	4.19894e-13	-0.0315275	0.00381893	upstream	CRV2G00019394(dist=712)	CRV2G00019394	Protein of unknown function	0
unitig_196:82655	-0.03233	0.004333	1	5.51621e-13	1.52568e-11	5.42042e-13	1.47052e-11	5.24166e-13	-0.0315275	0.00381893	upstream	CRV2G00019394(dist=676)	CRV2G00019394	Protein of unknown function	0
unitig_196:82676	-0.03233	0.004333	1	5.51621e-13	1.52568e-11	6.48671e-13	1.47052e-11	6.26927e-13	-0.0315275	0.00381893	upstream	CRV2G00019394(dist=655)	CRV2G00019394	Protein of unknown function	0
unitig_359:8086	-0.01925	0.00261	1	3.57551e-13	1.60056e-11	7.59153e-13	1.56481e-11	7.34993e-13	-0.0177098	0.00246284	intergenic	CRV2G00020125(dist=1125),CRV2G00020126(dist=1451)	CRV2G00020125	Protein of unknown function	0
unitig_350:2278	-0.039	0.005196	1	8.08948e-13	1.88953e-11	8.88697e-13	1.80864e-11	8.58931e-13	-0.0344463	0.00316986	intergenic	CRV2G00020348(dist=1559),NONE(dist=NONE)	CRV2G00020348	Protein of unknown function	0
scf_014:974538	0.03475	0.004763	2.27642e-12	1	5.62936e-11	1.28164e-12	5.40172e-11	1.23594e-12	0.0328393	0.00362751	intergenic	CRV2G00012293(dist=6535),CRV2G00012294(dist=23955)	CRV2G00012293	Protein of unknown function	GO:0005975;GO:0003824
scf_014:974563	0.03475	0.004763	2.27642e-12	1	5.62936e-11	1.66905e-12	5.40172e-11	1.60764e-12	0.0328393	0.00362751	intergenic	CRV2G00012293(dist=6560),CRV2G00012294(dist=23930)	CRV2G00012293	Protein of unknown function	GO:0005975;GO:0003824
scf_014:991023	-0.04625	0.00619	1	4.37301e-12	8.60887e-11	2.25939e-12	8.17157e-11	2.16784e-12	-0.0364152	0.00455413	intergenic	CRV2G00012293(dist=23020),CRV2G00012294(dist=7470)	CRV2G00012293	Protein of unknown function	GO:0005975;GO:0003824
scf_022:3437015	-0.045	0.006062	1	4.78968e-12	9.56054e-11	2.90763e-12	9.08157e-11	2.78345e-12	-0.0359268	0.00401641	intergenic	CRV2G00005838(dist=13868),CRV2G00005839(dist=23581)	CRV2G00005838	Protein of unknown function	GO:0016772
unitig_71:2840	-0.04125	0.005629	1	4.55829e-12	9.64816e-11	3.55297e-12	9.19233e-11	3.3982e-12	-0.034893	0.00328589	downstream	CRV2G00021992(dist=692)	CRV2G00021992	Protein of unknown function	GO:0055114;GO:0016491
unitig_908:4895	-0.04075	0.005629	1	7.98823e-12	1.67197e-10	4.67382e-12	1.59209e-10	4.4654e-12	-0.0347219	0.00330423	intergenic	NONE(dist=NONE),NONE(dist=NONE)		#N/A	#N/A
unitig_196:75716	-0.03317	0.004667	1	8.07237e-12	1.98708e-10	5.99378e-12	1.90636e-10	5.73187e-12	-0.0319047	0.00391466	downstream	CRV2G00019392(dist=574)	CRV2G00019392	Similar to pnbA Para-nitrobenzyl esterase (Bacillus subtilis (strain 168))	GO:0004104
unitig_821:2410437	-0.03717	0.005207	1	9.53625e-12	2.1224e-10	7.38734e-12	2.02704e-10	7.06276e-12	-0.0336968	0.00346473	upstream;downstream	CRV2G00008681(dist=378);CRV2G00008680(dist=425)	CRV2G00008681	Similar to het-s Heterokaryon incompatibility protein s (Podospora anserina)	0
unitig_821:2410509	-0.03717	0.005207	1	9.53625e-12	2.1224e-10	8.76219e-12	2.02704e-10	8.37579e-12	-0.0336968	0.00346473	upstream;downstream	CRV2G00008681(dist=306);CRV2G00008680(dist=497)	CRV2G00008681	Similar to het-s Heterokaryon incompatibility protein s (Podospora anserina)	0
unitig_821:2411255	-0.03717	0.005207	1	9.53625e-12	2.1224e-10	1.01187e-11	2.02704e-10	9.67131e-12	-0.0336968	0.00346473	exonic	CRV2G00008681	CRV2G00008681	Similar to het-s Heterokaryon incompatibility protein s (Podospora anserina)	0
unitig_821:2411312	-0.03717	0.005207	1	9.53625e-12	2.1224e-10	1.14573e-11	2.02704e-10	1.09497e-11	-0.0336968	0.00346473	exonic	CRV2G00008681	CRV2G00008681	Similar to het-s Heterokaryon incompatibility protein s (Podospora anserina)	0
unitig_821:2411814	-0.03717	0.005207	1	9.53625e-12	2.1224e-10	1.27782e-11	2.02704e-10	1.22112e-11	-0.0336968	0.00346473	downstream	CRV2G00008681(dist=133)	CRV2G00008681	Similar to het-s Heterokaryon incompatibility protein s (Podospora anserina)	0
unitig_821:2411913	-0.03717	0.005207	1	9.53625e-12	2.1224e-10	1.40819e-11	2.02704e-10	1.34563e-11	-0.0336968	0.00346473	downstream	CRV2G00008681(dist=232)	CRV2G00008681	Similar to het-s Heterokaryon incompatibility protein s (Podospora anserina)	0
unitig_821:2412281	-0.03717	0.005207	1	9.53625e-12	2.1224e-10	1.53686e-11	2.02704e-10	1.46852e-11	-0.0336968	0.00346473	upstream;downstream	CRV2G00008682(dist=643);CRV2G00008681(dist=600)	CRV2G00008682	Protein of unknown function	0
unitig_821:1852862	-0.0375	0.005292	1	1.45675e-11	3.17092e-10	1.73152e-11	3.02524e-10	1.65422e-11	-0.0337693	0.0034681	intergenic	CRV2G00008510(dist=20889),CRV2G00008511(dist=10083)	CRV2G00008510	Protein of unknown function	0
unitig_352:11718	0.01475	0.002165	8.88803e-12	1	4.43309e-10	2.0046e-11	4.3442e-10	1.92209e-11	0.0138447	0.00215808	intergenic	NONE(dist=NONE),NONE(dist=NONE)		#N/A	#N/A
unitig_135:15520	-0.03	0.00433	1	2.53591e-11	6.55191e-10	2.40915e-11	6.29832e-10	2.31101e-11	-0.029459	0.00435348	upstream;downstream	CRV2G00020613(dist=116);CRV2G00020614(dist=139)	CRV2G00020613	Protein of unknown function	0
scf_014:997485	-0.06362	0.00858	1	6.14583e-11	8.83883e-10	2.95332e-11	8.22425e-10	2.81691e-11	-0.0589614	0.0114107	intergenic	CRV2G00012293(dist=29482),CRV2G00012294(dist=1008)	CRV2G00012293	Protein of unknown function	GO:0005975;GO:0003824
unitig_64:6327	0.025	0.00364	3.25049e-11	1	9.8481e-10	3.55412e-11	9.52305e-10	3.39813e-11	0.0238255	0.004371	intergenic	CRV2G00020976(dist=4893),CRV2G00020977(dist=8054)	CRV2G00020976	Similar to mug14 Meiotically up-regulated gene 14 protein (Schizosaccharomyces pombe (strain 972 / ATCC 24843))	0
unitig_310:5221	0.0425	0.006083	6.68068e-11	1	1.25743e-09	4.3178e-11	1.19062e-09	4.12103e-11	0.0349588	0.00358737	upstream;downstream	CRV2G00021523(dist=32);CRV2G00021524(dist=791)	CRV2G00021523	Protein of unknown function	GO:0055114;GO:0008270;GO:0016491
scf_014:1095930	-0.0355	0.005196	1	7.00803e-11	1.50116e-09	5.22338e-11	1.43108e-09	4.9843e-11	-0.0328925	0.00380709	intergenic	CRV2G00012323(dist=5516),CRV2G00012324(dist=1772)	CRV2G00012323	Protein of unknown function	0
unitig_821:1852875	-0.0355	0.005196	1	7.00803e-11	1.50116e-09	6.11778e-11	1.43108e-09	5.83692e-11	-0.0328925	0.00380709	intergenic	CRV2G00008510(dist=20902),CRV2G00008511(dist=10070)	CRV2G00008510	Protein of unknown function	0
unitig_821:1852887	-0.0355	0.005196	1	7.00803e-11	1.50116e-09	7.00121e-11	1.43108e-09	6.67907e-11	-0.0328925	0.00380709	intergenic	CRV2G00008510(dist=20914),CRV2G00008511(dist=10058)	CRV2G00008510	Protein of unknown function	0
unitig_327:11764	0.0466	0.0066	8.76533e-11	1	1.54212e-09	7.89884e-11	1.45447e-09	7.52522e-11	0.0361942	0.00477778	intergenic	CRV2G00020890(dist=2362),NONE(dist=NONE)	CRV2G00020890	Protein of unknown function	0
scf_022:3435398	0.05275	0.007361	1.30977e-10	1	2.10772e-09	9.12837e-11	1.97675e-09	8.67764e-11	0.0408644	0.00925572	intergenic	CRV2G00005838(dist=12251),CRV2G00005839(dist=25198)	CRV2G00005838	Protein of unknown function	GO:0016772
unitig_583:16790	0.0415	0.006062	1.48728e-10	1	2.75697e-09	1.07342e-10	2.60825e-09	1.01966e-10	0.03463	0.00356761	intergenic	CRV2G00020552(dist=9675),NONE(dist=NONE)	CRV2G00020552	Protein of unknown function	0
scf_014:988054	-0.04383	0.00636	1	1.65094e-10	2.94238e-09	1.24318e-10	2.77729e-09	1.17986e-10	-0.0352081	0.00387318	intergenic	CRV2G00012293(dist=20051),CRV2G00012294(dist=10439)	CRV2G00012293	Protein of unknown function	GO:0005975;GO:0003824
unitig_760:7909	0.01375	0.002165	1.6467e-10	1	7.68951e-09	1.69349e-10	7.52484e-09	1.62074e-10	0.0129111	0.00202367	UTR5	CRV2G00020684(CRV2T00020684_1:c.-324A>G)	CRV2G00020684	Similar to FRQ Frequency clock protein (Trichoderma spinulosum)	GO:0005737;GO:0006355;GO:0005634;GO:0007623
unitig_16:12443	0.0165	0.002598	2.6656e-10	1	1.04173e-08	2.29988e-10	1.01507e-08	2.21179e-10	0.0152303	0.00254062	upstream;downstream	CRV2G00021206,CRV2G00021207(dist=404);CRV2G00021205(dist=894)	CRV2G00021206	Protein of unknown function	0
unitig_823:629472	0.03075	0.004763	6.56614e-10	1	1.45107e-08	3.13992e-10	1.38541e-08	3.01372e-10	0.029828	0.00467012	intergenic	CRV2G00015724(dist=4175),NONE(dist=NONE)	CRV2G00015724	Similar to FUS6 Efflux pump FUS6 (Gibberella moniliformis (strain M3125 / FGSC 7600))	GO:0055085;GO:0016021
unitig_823:629487	0.03075	0.004763	6.56614e-10	1	1.45107e-08	3.97014e-10	1.38541e-08	3.80628e-10	0.029828	0.00467012	intergenic	CRV2G00015724(dist=4190),NONE(dist=NONE)	CRV2G00015724	Similar to FUS6 Efflux pump FUS6 (Gibberella moniliformis (strain M3125 / FGSC 7600))	GO:0055085;GO:0016021
unitig_912:3650	-0.0295	0.004583	1	7.11955e-10	1.62793e-08	4.89353e-10	1.55674e-08	4.68923e-10	-0.0287137	0.00480894	intergenic	NONE(dist=NONE),NONE(dist=NONE)		#N/A	#N/A
unitig_95:13807	0.027	0.0042	6.90706e-10	1	1.71504e-08	5.8566e-10	1.64597e-08	5.61355e-10	0.0260208	0.00489443	intronic	CRV2G00021542	CRV2G00021542	Similar to SPAC3A11.10c Uncharacterized dipeptidase C3A11.10c (Schizosaccharomyces pombe (strain 972 / ATCC 24843))	GO:0006508;GO:0008235;GO:0008239;GO:0016805
unitig_218:15418	-0.04233	0.006459	1	1.22643e-09	2.05848e-08	7.00597e-10	1.93584e-08	6.69384e-10	-0.0345889	0.00383403	upstream	CRV2G00021064(dist=58)	CRV2G00021064	Protein of unknown function	GO:0005975;GO:0003824
unitig_601:555	-0.0225	0.003536	1	7.27374e-10	2.11154e-08	8.17253e-10	2.0388e-08	7.82062e-10	-0.0203861	0.00407796	exonic	CRV2G00019328	CRV2G00019328	Similar to HET-E1 Vegetative incompatibility protein HET-E-1 (Podospora anserina)	0
unitig_601:564	-0.0225	0.003536	1	7.27374e-10	2.11154e-08	9.32584e-10	2.0388e-08	8.9346e-10	-0.0203861	0.00407796	exonic	CRV2G00019328	CRV2G00019328	Similar to HET-E1 Vegetative incompatibility protein HET-E-1 (Podospora anserina)	0
unitig_141:11848	-0.022	0.003464	1	7.30821e-10	2.16033e-08	1.04937e-09	2.08724e-08	1.00634e-09	-0.0198174	0.00389578	exonic	CRV2G00021748	CRV2G00021748	Protein of unknown function	0
unitig_785:51497	0.032	0.005025	1.24082e-09	1	2.57332e-08	1.18804e-09	2.44924e-08	1.13828e-09	0.0306936	0.00459683	intergenic	CRV2G00019355(dist=14592),CRV2G00019356(dist=4103)	CRV2G00019355	Protein of unknown function	0
unitig_122:4388	0.0275	0.00433	1.16364e-09	1	2.77508e-08	1.33644e-09	2.65872e-08	1.28045e-09	0.0265478	0.00497788	downstream	CRV2G00022200(dist=117)	CRV2G00022200	Protein of unknown function	0
unitig_204:4561	0.01875	0.003031	1.15997e-09	1	3.80824e-08	1.54058e-09	3.69225e-08	1.47846e-09	0.0168346	0.0028946	intergenic	NONE(dist=NONE),NONE(dist=NONE)		#N/A	#N/A
unitig_204:4574	0.01875	0.003031	1.15997e-09	1	3.80824e-08	1.74247e-09	3.69225e-08	1.67429e-09	0.0168346	0.0028946	intergenic	NONE(dist=NONE),NONE(dist=NONE)		#N/A	#N/A
unitig_204:4598	0.01875	0.003031	1.15997e-09	1	3.80824e-08	1.94214e-09	3.69225e-08	1.86796e-09	0.0168346	0.0028946	intergenic	NONE(dist=NONE),NONE(dist=NONE)		#N/A	#N/A
unitig_204:4604	0.01875	0.003031	1.15997e-09	1	3.80824e-08	2.13963e-09	3.69225e-08	2.05951e-09	0.0168346	0.0028946	intergenic	NONE(dist=NONE),NONE(dist=NONE)		#N/A	#N/A
unitig_114:737177	-0.03938	0.006182	1	2.57658e-09	4.39289e-08	2.36674e-09	4.13523e-08	2.27306e-09	-0.0337544	0.00387103	intergenic	CRV2G00014625(dist=11229),NONE(dist=NONE)	CRV2G00014625	Protein of unknown function	0
unitig_333:200606	-0.0385	0.006062	1	2.5834e-09	4.4745e-08	2.59581e-09	4.21616e-08	2.48867e-09	-0.0335094	0.00391881	intergenic	CRV2G00018666(dist=21542),CRV2G00018668(dist=11110)	CRV2G00018666	Protein of unknown function	GO:0003676;GO:0046872
unitig_333:200607	-0.0385	0.006062	1	2.5834e-09	4.4745e-08	2.82242e-09	4.21616e-08	2.70197e-09	-0.0335094	0.00391881	intergenic	CRV2G00018666(dist=21543),CRV2G00018668(dist=11109)	CRV2G00018666	Protein of unknown function	GO:0003676;GO:0046872
unitig_243:20540	-0.02975	0.004763	1	2.46854e-09	5.29332e-08	3.09039e-09	5.04647e-08	3.45922e-09	-0.0288028	0.00497503	intergenic	CRV2G00019855(dist=1647),NONE(dist=NONE)	CRV2G00019855	Protein of unknown function	0
unitig_818:205610	0.04964	0.007545	3.7146e-09	1	5.40951e-08	3.3617e-09	5.03805e-08	2.95693e-09	0.0370335	0.00654359	downstream	CRV2G00017630(dist=187)	CRV2G00017630	Protein of unknown function	GO:0003677;GO:0046872
unitig_818:205620	0.04964	0.007545	3.7146e-09	1	5.40951e-08	3.63013e-09	5.03805e-08	3.20919e-09	0.0370335	0.00654359	downstream	CRV2G00017630(dist=177)	CRV2G00017630	Protein of unknown function	GO:0003677;GO:0046872
scf_024:1077051	-0.0515	0.007794	1	4.22543e-09	5.99335e-08	3.92646e-09	5.57081e-08	3.73421e-09	-0.0382918	0.00789726	intergenic	CRV2G00013434(dist=16493),NONE(dist=NONE)	CRV2G00013434	Similar to DEX Dextranase (Talaromyces minioluteus)	GO:0004553
unitig_960:2422	-0.02433	0.00393	1	2.65938e-09	6.7993e-08	4.26189e-09	6.53337e-08	4.05672e-09	-0.0224967	0.00476548	intergenic	NONE(dist=NONE),NONE(dist=NONE)		#N/A	#N/A
unitig_821:1885102	0.058	0.00866	5.75023e-09	1	7.48696e-08	4.62964e-09	6.91194e-08	4.39559e-09	0.0462711	0.0127713	intergenic	CRV2G00008512(dist=18237),CRV2G00008513(dist=8012)	CRV2G00008512	Similar to CHS8 Chitin synthase 8 (Ustilago maydis (strain 521 / FGSC 9021))	GO:0016758
unitig_669:61779	0.03425	0.005629	8.91023e-09	1	1.59239e-07	5.43072e-09	1.50328e-07	5.15172e-09	0.0317275	0.00457195	upstream	CRV2G00019603(dist=971)	CRV2G00019603	Protein of unknown function	GO:0016747
unitig_717:942	0.063	0.009526	1.51423e-08	1	1.78623e-07	6.32346e-09	1.63481e-07	5.96785e-09	0.0532372	0.0140633	upstream	CRV2G00020373(dist=252)	CRV2G00020373	Protein of unknown function	0
unitig_717:947	0.063	0.009526	1.51423e-08	1	1.78623e-07	7.20705e-09	1.63481e-07	6.7756e-09	0.0532372	0.0140633	upstream	CRV2G00020373(dist=257)	CRV2G00020373	Protein of unknown function	0
unitig_625:2983	0.0495	0.007794	1.50325e-08	1	2.05848e-07	8.22052e-09	1.90815e-07	7.71458e-09	0.0366128	0.00643651	upstream	CRV2G00017673(dist=596)	CRV2G00017673	Similar to BQ2027_MB1310 Uncharacterized GMC-type oxidoreductase Mb1310 (Mycobacterium bovis (strain ATCC BAA-935 / AF2122/97))	GO:0016614;GO:0008812;GO:0055114;GO:0050660;GO:0006066
unitig_111:10431	0.01	0.001732	3.9592e-09	1	2.10501e-07	9.24733e-09	2.06542e-07	8.72386e-09	0.00993574	0.00167413	upstream	CRV2G00015925,CRV2G00015926(dist=290)	CRV2G00015925	Protein of unknown function	0
unitig_298:4703	0.0205	0.003464	8.32398e-09	1	2.30591e-07	1.03652e-08	2.22267e-07	9.80236e-09	0.0180793	0.00356568	intergenic	NONE(dist=NONE),NONE(dist=NONE)		#N/A	#N/A
unitig_298:4709	0.0205	0.003464	8.32398e-09	1	2.30591e-07	1.14719e-08	2.22267e-07	1.087e-08	0.0180793	0.00356568	intergenic	NONE(dist=NONE),NONE(dist=NONE)		#N/A	#N/A
unitig_298:4749	0.0205	0.003464	8.32398e-09	1	2.30591e-07	1.25675e-08	2.22267e-07	1.1927e-08	0.0180793	0.00356568	intergenic	NONE(dist=NONE),NONE(dist=NONE)		#N/A	#N/A
unitig_723:26420	-0.04783	0.007623	1	1.82483e-08	2.5235e-07	1.37604e-08	2.34102e-07	1.30324e-08	-0.0358049	0.00554581	downstream	CRV2G00016667(dist=254)	CRV2G00016667	Protein of unknown function	0
unitig_723:26431	-0.04783	0.007623	1	1.82483e-08	2.5235e-07	1.49416e-08	2.34102e-07	1.41268e-08	-0.0358049	0.00554581	downstream	CRV2G00016667(dist=265)	CRV2G00016667	Protein of unknown function	0
scf_024:1036383	-0.06608	0.01009	1	2.8259e-08	3.13613e-07	1.64129e-08	2.85354e-07	1.54629e-08	-0.0566533	0.013931	intergenic	CRV2G00013428(dist=7875),CRV2G00013429(dist=8346)	CRV2G00013428	Similar to Ache Acetylcholinesterase (Mus musculus)	0
scf_024:1036421	-0.06608	0.01009	1	2.8259e-08	3.13613e-07	1.78697e-08	2.85354e-07	1.67859e-08	-0.0566533	0.013931	intergenic	CRV2G00013428(dist=7913),CRV2G00013429(dist=8308)	CRV2G00013428	Similar to Ache Acetylcholinesterase (Mus musculus)	0
unitig_385:7859	-0.02825	0.004763	1	1.6442e-08	3.36413e-07	1.94236e-08	3.19971e-07	1.82648e-08	-0.0270136	0.00541646	intergenic	NONE(dist=NONE),NONE(dist=NONE)		#N/A	#N/A
scf_014:997493	-0.06183	0.009597	1	4.05857e-08	4.64754e-07	2.15854e-08	4.24169e-07	2.02352e-08	-0.0502942	0.0142441	intergenic	CRV2G00012293(dist=29490),CRV2G00012294(dist=1000)	CRV2G00012293	Protein of unknown function	GO:0005975;GO:0003824
unitig_333:207847	-0.05592	0.008808	1	3.90715e-08	4.77785e-07	2.37893e-08	4.38714e-07	2.22568e-08	-0.0417432	0.0112224	intergenic	CRV2G00018666(dist=28783),CRV2G00018668(dist=3869)	CRV2G00018666	Protein of unknown function	GO:0003676;GO:0046872
scf_014:988849	-0.04567	0.00753	0.999999	4.55954e-08	6.18898e-07	2.66504e-08	5.73303e-07	2.49061e-08	-0.0348949	0.00485124	intergenic	CRV2G00012293(dist=20846),CRV2G00012294(dist=9644)	CRV2G00012293	Protein of unknown function	GO:0005975;GO:0003824
unitig_629:406168	0.025	0.00433	3.47461e-08	0.999999	7.59795e-07	3.01582e-08	7.25049e-07	2.82561e-08	0.0229633	0.00528765	intergenic	CRV2G00017284(dist=25893),NONE(dist=NONE)	CRV2G00017284	Protein of unknown function	GO:0006810;GO:0005215;GO:0016020
unitig_629:406189	0.025	0.00433	3.47461e-08	0.999999	7.59795e-07	3.36327e-08	7.25049e-07	3.15741e-08	0.0229633	0.00528765	intergenic	CRV2G00017284(dist=25914),NONE(dist=NONE)	CRV2G00017284	Protein of unknown function	GO:0006810;GO:0005215;GO:0016020
unitig_1016:13768	-0.04367	0.007327	0.999999	6.25456e-08	8.5746e-07	3.75371e-08	7.94915e-07	3.51919e-08	-0.034301	0.00451183	intergenic	NONE(dist=NONE),CRV2G00013765(dist=5945)	CRV2G00013765	Similar to ANK2 Ankyrin-2 (Homo sapiens)	GO:0005515
unitig_54:12844	0.01175	0.002136	2.18938e-08	0.999999	9.06614e-07	4.16365e-08	8.84721e-07	3.91991e-08	0.0113066	0.00189978	UTR3	CRV2G00021605(CRV2T00021605_1:c.*354C>A)	CRV2G00021605	Protein of unknown function	0
scf_014:987069	-0.03262	0.005671	0.999999	5.97899e-08	1.00903e-06	4.61782e-08	9.49239e-07	4.34716e-08	-0.0304661	0.00517897	intergenic	CRV2G00012293(dist=19066),CRV2G00012294(dist=11424)	CRV2G00012293	Protein of unknown function	GO:0005975;GO:0003824
scf_004:1593067	0.0525	0.00866	1.31975e-07	0.999998	1.57427e-06	5.33189e-08	1.4423e-06	5.00081e-08	0.0377674	0.00839644	upstream	CRV2G00010311(dist=107)	CRV2G00010311	Similar to azaE Ketoreductase azaE (Aspergillus niger (strain ATCC 1015 / CBS 113.46 / FGSC A1144 / LSHB Ac4 / NCTC 3858a / NRRL 328 / USDA 3528.7))	GO:0050662;GO:0003824;GO:0044237
unitig_821:2381117	-0.0345	0.00611	0.999998	1.28498e-07	1.98907e-06	6.23224e-08	1.86058e-06	5.84294e-08	-0.031319	0.00506909	upstream	CRV2G00008671,CRV2G00008672(dist=870)	CRV2G00008671	Protein of unknown function	0
unitig_818:191903	0.04962	0.008374	1.89608e-07	0.999998	2.28648e-06	7.26194e-08	2.09687e-06	6.78666e-08	0.0359805	0.0065617	upstream	CRV2G00017626(dist=384)	CRV2G00017626	Protein of unknown function	0
unitig_228:154901	0.03617	0.006451	1.89129e-07	0.999997	2.76567e-06	8.50298e-08	2.57654e-06	7.94273e-08	0.0319415	0.00493689	upstream	CRV2G00018572(dist=609)	CRV2G00018572	Similar to isp4 Sexual differentiation process protein isp4 (Schizosaccharomyces pombe (strain 972 / ATCC 24843))	GO:0055085
unitig_818:287386	0.04162	0.007341	2.54274e-07	0.999997	3.33047e-06	9.99172e-08	3.0762e-06	9.3174e-08	0.0334945	0.00466049	upstream	CRV2G00017650(dist=713)	CRV2G00017650	Protein of unknown function	0
unitig_114:737130	-0.04058	0.007194	0.999997	2.60941e-07	3.46688e-06	1.15291e-07	3.20594e-06	1.07388e-07	-0.0332262	0.00467025	intergenic	CRV2G00014625(dist=11182),NONE(dist=NONE)	CRV2G00014625	Protein of unknown function	0
unitig_114:737136	-0.04058	0.007194	0.999997	2.60941e-07	3.46688e-06	1.30526e-07	3.20594e-06	1.21472e-07	-0.0332262	0.00467025	intergenic	CRV2G00014625(dist=11188),NONE(dist=NONE)	CRV2G00014625	Protein of unknown function	0
unitig_200:26896	0.05342	0.009041	3.58073e-07	0.999996	4.01603e-06	1.48107e-07	3.65796e-06	1.37474e-07	0.0379779	0.00898794	intergenic	CRV2G00019727(dist=1383),CRV2G00019728(dist=4033)	CRV2G00019727	Protein of unknown function	0
scf_014:990930	-0.04175	0.007419	0.999996	3.28974e-07	4.23942e-06	1.66537e-07	3.91045e-06	1.54469e-07	-0.0334631	0.00472603	intergenic	CRV2G00012293(dist=22927),CRV2G00012294(dist=7563)	CRV2G00012293	Protein of unknown function	GO:0005975;GO:0003824
scf_014:990938	-0.04175	0.007419	0.999996	3.28974e-07	4.23942e-06	1.84801e-07	3.91045e-06	1.71312e-07	-0.0334631	0.00472603	intergenic	CRV2G00012293(dist=22935),CRV2G00012294(dist=7555)	CRV2G00012293	Protein of unknown function	GO:0005975;GO:0003824
scf_014:990978	-0.04175	0.007419	0.999996	3.28974e-07	4.23942e-06	2.02902e-07	3.91045e-06	1.88005e-07	-0.0334631	0.00472603	intergenic	CRV2G00012293(dist=22975),CRV2G00012294(dist=7515)	CRV2G00012293	Protein of unknown function	GO:0005975;GO:0003824
scf_014:991001	-0.04175	0.007419	0.999996	3.28974e-07	4.23942e-06	2.20842e-07	3.91045e-06	2.04549e-07	-0.0334631	0.00472603	intergenic	CRV2G00012293(dist=22998),CRV2G00012294(dist=7492)	CRV2G00012293	Protein of unknown function	GO:0005975;GO:0003824
unitig_336:9029	0.0235	0.00433	2.1171e-07	0.999996	4.37869e-06	2.39239e-07	4.16698e-06	2.22082e-07	0.0207738	0.0051318	intergenic	CRV2G00020639(dist=2450),CRV2G00020640(dist=1408)	CRV2G00020639	Protein of unknown function	0
unitig_818:189861	-0.0375	0.006817	0.999995	3.98674e-07	5.44661e-06	2.62179e-07	5.04793e-06	2.43341e-07	-0.0322213	0.00498279	downstream	CRV2G00017626(dist=233)	CRV2G00017626	Protein of unknown function	0
unitig_111:300172	-0.033	0.006062	0.999995	3.63247e-07	5.48474e-06	2.85085e-07	5.12149e-06	2.64737e-07	-0.0302419	0.00556124	intergenic	CRV2G00016027(dist=13834),CRV2G00016028(dist=8442)	CRV2G00016027	Similar to trx Thioredoxin (Neurospora crassa (strain ATCC 24698 / 74-OR23-1A / CBS 708.71 / DSM 1257 / FGSC 987))	GO:0006662;GO:0015035;GO:0045454
unitig_87:9501	-0.038	0.006928	0.999994	4.61231e-07	6.19197e-06	3.1088e-07	5.73074e-06	2.88606e-07	-0.0323434	0.00497527	exonic	CRV2G00020669	CRV2G00020669	Protein of unknown function	GO:0055085;GO:0016021
unitig_912:3635	0.00675	0.001299	1.01663e-07	0.999993	6.5047e-06	3.37809e-07	6.40304e-06	3.40794e-07	0.00674935	0.00129845	intergenic	NONE(dist=NONE),NONE(dist=NONE)		#N/A	#N/A
unitig_891:17103	0.00675	0.001299	1.01663e-07	0.999993	6.5047e-06	3.64506e-07	6.40304e-06	3.66924e-07	0.00674935	0.00129845	intergenic	NONE(dist=NONE),NONE(dist=NONE)		#N/A	#N/A
unitig_71:2957	-0.0495	0.00866	0.999993	6.02775e-07	6.83246e-06	3.92385e-07	6.22968e-06	3.14436e-07	-0.0355626	0.0065867	downstream	CRV2G00021992(dist=809)	CRV2G00021992	Protein of unknown function	GO:0055114;GO:0016491
unitig_626:389221	0.04821	0.008491	6.1878e-07	0.999993	7.09993e-06	4.21173e-07	6.48115e-06	3.93166e-07	0.0350633	0.00603827	intergenic	CRV2G00017143(dist=15827),CRV2G00017144(dist=32992)	CRV2G00017143	Protein of unknown function	0
unitig_81:6823	-0.03025	0.005629	0.999993	4.49287e-07	7.18882e-06	4.50094e-07	6.73953e-06	4.20287e-07	-0.0282002	0.00600197	upstream	CRV2G00022221(dist=323)	CRV2G00022221	Protein of unknown function	0
unitig_41:224688	-0.03025	0.005629	0.999993	4.49287e-07	7.18882e-06	4.7877e-07	6.73953e-06	4.47177e-07	-0.0282002	0.00600197	intergenic	CRV2G00016392(dist=18196),CRV2G00016393(dist=17711)	CRV2G00016392	Similar to ARB_01230 Kelch repeat-containing protein ARB_01230 (Arthroderma benhamiae (strain ATCC MYA-4681 / CBS 112371))	GO:0005515
unitig_270:9147	-0.04562	0.008144	0.999992	6.51141e-07	7.67165e-06	5.09248e-07	7.02051e-06	4.7503e-07	-0.0342562	0.00529691	intergenic	NONE(dist=NONE),NONE(dist=NONE)		#N/A	#N/A
unitig_228:154874	0.03779	0.006961	6.16927e-07	0.999992	8.17221e-06	5.41581e-07	7.55529e-06	5.04905e-07	0.0321912	0.00507965	upstream	CRV2G00018572(dist=636)	CRV2G00018572	Similar to isp4 Sexual differentiation process protein isp4 (Schizosaccharomyces pombe (strain 972 / ATCC 24843))	GO:0055085
unitig_64:1799	-0.0325	0.006062	0.999992	5.54461e-07	8.26042e-06	5.74013e-07	7.70596e-06	5.35161e-07	-0.0298063	0.00575572	upstream	CRV2G00020976(dist=365)	CRV2G00020976	Similar to mug14 Meiotically up-regulated gene 14 protein (Schizosaccharomyces pombe (strain 972 / ATCC 24843))	0
unitig_785:9913	-0.0265	0.004991	0.999991	5.16648e-07	9.15883e-06	6.09933e-07	8.64218e-06	5.69082e-07	-0.0242326	0.00606893	intergenic	NONE(dist=NONE),CRV2G00019352(dist=13336)	CRV2G00019352	Protein of unknown function	0
unitig_882:2116	-0.03475	0.006495	0.99999	7.04111e-07	9.81994e-06	6.48308e-07	9.11583e-06	6.39819e-07	-0.0309618	0.00549183	intergenic	NONE(dist=NONE),NONE(dist=NONE)		#N/A	#N/A
scf_003:2818009	0.0456	0.008214	8.55696e-07	0.99999	9.92573e-06	6.86803e-07	9.07003e-06	6.04503e-07	0.0341719	0.00535637	exonic	CRV2G00007784	CRV2G00007784	Similar to PSD2 Phosphatidylserine decarboxylase proenzyme 2 (Oryza sativa subsp. japonica)	GO:0004609;GO:0008654
scf_008:3766492	0.0559	0.009686	1.04321e-06	0.999989	1.07715e-05	7.28476e-07	9.72829e-06	6.77375e-07	0.0393577	0.0106829	intergenic	CRV2G00001249(dist=28917),CRV2G00001250(dist=24093)	CRV2G00001249	Similar to NMA2 Nicotinamide/nicotinic acid mononucleotide adenylyltransferase 2 (Saccharomyces cerevisiae (strain ATCC 204508 / S288c))	GO:0003824;GO:0009058;GO:0009435;GO:0016779
unitig_821:1898028	-0.05769	0.009941	0.999989	1.0804e-06	1.09489e-05	7.70535e-07	9.8685e-06	7.15199e-07	-0.0410661	0.0119693	exonic	CRV2G00008514	CRV2G00008514	Protein of unknown function	0
unitig_821:1898074	-0.05769	0.009941	0.999989	1.0804e-06	1.09489e-05	8.1225e-07	9.8685e-06	7.52712e-07	-0.0410661	0.0119693	exonic	CRV2G00008514	CRV2G00008514	Protein of unknown function	0
unitig_41:225474	-0.03142	0.00597	0.999987	8.82247e-07	1.31183e-05	8.62478e-07	1.2236e-05	7.99583e-07	-0.0289129	0.00604687	intergenic	CRV2G00016392(dist=18982),CRV2G00016393(dist=16925)	CRV2G00016392	Similar to ARB_01230 Kelch repeat-containing protein ARB_01230 (Arthroderma benhamiae (strain ATCC MYA-4681 / CBS 112371))	GO:0005515
scf_014:987993	-0.042	0.007794	0.999985	1.2801e-06	1.51844e-05	9.20698e-07	1.39043e-05	8.52854e-07	-0.0331412	0.00511344	intergenic	CRV2G00012293(dist=19990),CRV2G00012294(dist=10500)	CRV2G00012293	Protein of unknown function	GO:0005975;GO:0003824
scf_014:988003	-0.042	0.007794	0.999985	1.2801e-06	1.51844e-05	9.78446e-07	1.39043e-05	9.05694e-07	-0.0331412	0.00511344	intergenic	CRV2G00012293(dist=20000),CRV2G00012294(dist=10490)	CRV2G00012293	Protein of unknown function	GO:0005975;GO:0003824
scf_014:988011	-0.042	0.007794	0.999985	1.2801e-06	1.51844e-05	1.03573e-06	1.39043e-05	9.58108e-07	-0.0331412	0.00511344	intergenic	CRV2G00012293(dist=20008),CRV2G00012294(dist=10482)	CRV2G00012293	Protein of unknown function	GO:0005975;GO:0003824
scf_014:988019	-0.042	0.007794	0.999985	1.2801e-06	1.51844e-05	1.09255e-06	1.39043e-05	1.0101e-06	-0.0331412	0.00511344	intergenic	CRV2G00012293(dist=20016),CRV2G00012294(dist=10474)	CRV2G00012293	Protein of unknown function	GO:0005975;GO:0003824
scf_014:1000305	-0.042	0.007794	0.999985	1.2801e-06	1.51844e-05	1.14892e-06	1.39043e-05	1.06168e-06	-0.0331412	0.00511344	intergenic	CRV2G00012294(dist=1422),CRV2G00012295(dist=12345)	CRV2G00012294	Protein of unknown function	0
scf_014:1000310	-0.042	0.007794	0.999985	1.2801e-06	1.51844e-05	1.20484e-06	1.39043e-05	1.11284e-06	-0.0331412	0.00511344	intergenic	CRV2G00012294(dist=1427),CRV2G00012295(dist=12340)	CRV2G00012294	Protein of unknown function	0
scf_014:1000317	-0.042	0.007794	0.999985	1.2801e-06	1.51844e-05	1.26031e-06	1.39043e-05	1.1636e-06	-0.0331412	0.00511344	intergenic	CRV2G00012294(dist=1434),CRV2G00012295(dist=12333)	CRV2G00012294	Protein of unknown function	0
scf_014:1000323	-0.042	0.007794	0.999985	1.2801e-06	1.51844e-05	1.31535e-06	1.39043e-05	1.21396e-06	-0.0331412	0.00511344	intergenic	CRV2G00012294(dist=1440),CRV2G00012295(dist=12327)	CRV2G00012294	Protein of unknown function	0
scf_014:1000358	-0.042	0.007794	0.999985	1.2801e-06	1.51844e-05	1.36995e-06	1.39043e-05	1.26392e-06	-0.0331412	0.00511344	intergenic	CRV2G00012294(dist=1475),CRV2G00012295(dist=12292)	CRV2G00012294	Protein of unknown function	0
scf_014:1604402	-0.027	0.005196	0.999984	9.72529e-07	1.62858e-05	1.42844e-06	1.53132e-05	1.37281e-06	-0.0246382	0.00627316	intergenic	CRV2G00012489(dist=18262),NONE(dist=NONE)	CRV2G00012489	Protein of unknown function	0
unitig_105:231370	0.03996	0.007494	1.3491e-06	0.999984	1.64392e-05	1.48708e-06	1.50901e-05	1.31814e-06	0.0325926	0.00516624	intergenic	CRV2G00018099(dist=16884),CRV2G00018100(dist=14565)	CRV2G00018099	Similar to TIC32 Short-chain dehydrogenase TIC 32, chloroplastic (Arabidopsis thaliana)	GO:0008152;GO:0016491
unitig_50:12055	-0.04867	0.008819	0.999983	1.56288e-06	1.69069e-05	1.54708e-06	1.5344e-05	1.42718e-06	-0.0349176	0.00636368	exonic	CRV2G00022065	CRV2G00022065	Protein of unknown function	GO:0016772
unitig_141:13020	-0.01867	0.003712	0.999981	8.44589e-07	1.8901e-05	1.61434e-06	1.80564e-05	1.49163e-06	-0.0160313	0.00352334	upstream	CRV2G00021748(dist=713)	CRV2G00021748	Protein of unknown function	0
unitig_673:135527	-0.04083	0.007688	0.99998	1.68336e-06	1.9968e-05	1.6852e-06	1.82847e-05	1.55647e-06	-0.0327522	0.00520897	exonic	CRV2G00018929	CRV2G00018929	Protein of unknown function	0
unitig_673:135551	-0.04083	0.007688	0.99998	1.68336e-06	1.9968e-05	1.75552e-06	1.82847e-05	1.62081e-06	-0.0327522	0.00520897	exonic	CRV2G00018929	CRV2G00018929	Protein of unknown function	0
unitig_818:179633	-0.03843	0.007306	0.999979	1.66923e-06	2.0577e-05	1.82764e-06	1.89077e-05	1.68704e-06	-0.0320717	0.00534226	exonic	CRV2G00017622	CRV2G00017622	Protein of unknown function	0
unitig_48:9862	0.03392	0.006533	1.54959e-06	0.999979	2.0941e-05	1.90059e-06	1.93914e-05	1.75461e-06	0.0302729	0.00586462	intronic	CRV2G00021777	CRV2G00021777	Protein of unknown function	GO:0030246;GO:0004553;GO:0005975
unitig_242:8560	0.04087	0.007719	1.84495e-06	0.999978	2.17474e-05	1.97605e-06	1.99024e-05	1.82362e-06	0.0327312	0.0052395	upstream	CRV2G00019058(dist=674)	CRV2G00019058	Protein of unknown function	GO:0046872
unitig_242:8598	0.04087	0.007719	1.84495e-06	0.999978	2.17474e-05	2.05094e-06	1.99024e-05	1.8921e-06	0.0327312	0.0052395	upstream	CRV2G00019058(dist=636)	CRV2G00019058	Protein of unknown function	GO:0046872
unitig_226:7919	-0.04025	0.007667	0.999974	2.17693e-06	2.56315e-05	2.13993e-06	2.34545e-05	1.97347e-06	-0.0325068	0.00531859	intergenic	NONE(dist=NONE),NONE(dist=NONE)		#N/A	#N/A
unitig_795:7214	-0.0125	0.002598	0.999971	9.70757e-07	2.94244e-05	2.2425e-06	2.84536e-05	2.07302e-06	-0.0117051	0.0022954	intergenic	CRV2G00019662(dist=6132),CRV2G00019663(dist=5972)	CRV2G00019662	Protein of unknown function	0
unitig_795:7215	-0.0125	0.002598	0.999971	9.70757e-07	2.94244e-05	2.3443e-06	2.84536e-05	2.17182e-06	-0.0117051	0.0022954	intergenic	CRV2G00019662(dist=6133),CRV2G00019663(dist=5971)	CRV2G00019662	Protein of unknown function	0
unitig_1018:583679	0.04379	0.008296	2.90778e-06	0.999968	3.20102e-05	2.455e-06	2.91024e-05	2.27231e-06	0.0333069	0.00547058	intergenic	CRV2G00015919(dist=49375),NONE(dist=NONE)	CRV2G00015919	Similar to ANK1 Ankyrin-1 (Homo sapiens)	GO:0005515
unitig_821:2189107	0.04321	0.008209	2.91686e-06	0.999968	3.23423e-05	2.5661e-06	2.94254e-05	2.37325e-06	0.0331612	0.00543279	intergenic	CRV2G00008612(dist=7346),CRV2G00008613(dist=5125)	CRV2G00008612	Similar to TP53I3 Quinone oxidoreductase PIG3 (Homo sapiens)	GO:0055114;GO:0016747;GO:0008270;GO:0016491
unitig_189:10447	-0.036	0.007024	0.999967	2.66049e-06	3.32533e-05	2.67976e-06	3.05928e-05	2.58042e-06	-0.0310269	0.00577198	exonic	CRV2G00021917	CRV2G00021917	Protein of unknown function	0
unitig_243:7684	0.058	0.01039	3.59615e-06	0.999966	3.38939e-05	2.79494e-06	3.02977e-05	2.47667e-06	0.0402086	0.0119375	upstream;downstream	CRV2G00019851(dist=872);CRV2G00019850,CRV2G00019852(dist=872)	CRV2G00019851	Protein of unknown function	0
scf_014:1003813	0.069	0.01203	4.32908e-06	0.999963	3.66582e-05	2.91944e-06	3.23291e-05	2.68979e-06	0.051891	0.0161148	intergenic	CRV2G00012294(dist=4930),CRV2G00012295(dist=8837)	CRV2G00012294	Protein of unknown function	0
unitig_41:277090	-0.03775	0.007361	0.999963	3.12361e-06	3.74169e-05	3.0458e-06	3.42933e-05	2.91949e-06	-0.0316123	0.00563549	intergenic	CRV2G00016399(dist=20886),CRV2G00016400(dist=5704)	CRV2G00016399	Protein of unknown function	0
unitig_41:277114	-0.03775	0.007361	0.999963	3.12361e-06	3.74169e-05	3.17124e-06	3.42933e-05	3.03357e-06	-0.0316123	0.00563549	intergenic	CRV2G00016399(dist=20910),CRV2G00016400(dist=5680)	CRV2G00016399	Protein of unknown function	0
unitig_146:10329	0.04688	0.00882	3.59055e-06	0.999962	3.76132e-05	3.29649e-06	3.40226e-05	2.80456e-06	0.0340429	0.00601441	intronic	CRV2G00020825	CRV2G00020825	Protein of unknown function	0
unitig_935:15323	0.03275	0.006495	3.11253e-06	0.999959	4.12326e-05	3.43394e-06	3.81201e-05	3.1607e-06	0.0293205	0.00627545	upstream;downstream	CRV2G00020414(dist=65);CRV2G00020415,CRV2G00020416,CRV2G00020417(dist=83)	CRV2G00020414	#N/A	#N/A
unitig_659:57828	0.05964	0.01073	4.83767e-06	0.999956	4.41459e-05	3.58091e-06	3.93082e-05	3.29119e-06	0.0414654	0.0129371	intergenic	CRV2G00019292(dist=2391),CRV2G00019293(dist=5112)	CRV2G00019292	Similar to chit42 Endochitinase 42 (Trichoderma harzianum)	GO:0004568;GO:0004553;GO:0005975;GO:0003824;GO:0006032
unitig_748:13995	0.00625	0.001299	7.49426e-07	0.999955	4.46819e-05	3.72876e-06	4.39325e-05	3.43739e-06	0.00624948	0.00129932	intergenic	CRV2G00021660(dist=4446),NONE(dist=NONE)	CRV2G00021660	Similar to apdG Acyl-CoA dehydrogenase apdG (Emericella nidulans (strain FGSC A4 / ATCC 38163 / CBS 112.46 / NRRL 194 / M139))	GO:0003995;GO:0055114;GO:0050660;GO:0016627;GO:0008152;GO:0020037
unitig_818:227748	-0.02745	0.005524	0.999951	3.21141e-06	4.88302e-05	3.89041e-06	4.56188e-05	3.58857e-06	-0.0247322	0.00661947	exonic	CRV2G00017633	CRV2G00017633	Protein of unknown function	GO:0009116;GO:0005515;GO:0003824;GO:0043531
unitig_213:1830	0.0165	0.003464	2.24134e-06	0.999949	5.10558e-05	4.05886e-06	4.88145e-05	3.75009e-06	0.0144101	0.00316491	intergenic	NONE(dist=NONE),NONE(dist=NONE)		#N/A	#N/A
unitig_161:12885	-0.01875	0.003897	0.999947	2.56273e-06	5.26398e-05	4.23174e-06	5.00771e-05	4.07865e-06	-0.0159081	0.00368987	exonic	CRV2G00020634	CRV2G00020634	Protein of unknown function	0
unitig_161:12900	-0.01875	0.003897	0.999947	2.56273e-06	5.26398e-05	4.4034e-06	5.00771e-05	4.24119e-06	-0.0159081	0.00368987	exonic	CRV2G00020634	CRV2G00020634	Protein of unknown function	0
unitig_270:5489	0.01875	0.003897	2.56273e-06	0.999947	5.26398e-05	4.57385e-06	5.00771e-05	3.91496e-06	0.0159081	0.00368987	intergenic	NONE(dist=NONE),NONE(dist=NONE)		#N/A	#N/A
unitig_135:14505	-0.02633	0.005403	0.999927	4.78772e-06	7.30703e-05	4.81504e-06	6.82826e-05	4.46669e-06	-0.0233047	0.0065704	downstream	CRV2G00020613(dist=28)	CRV2G00020613	Protein of unknown function	0
unitig_823:635142	-0.03462	0.007017	0.999923	6.32216e-06	7.65517e-05	5.06674e-06	7.02296e-05	5.36031e-06	-0.0300199	0.00629327	intergenic	CRV2G00015724(dist=9845),NONE(dist=NONE)	CRV2G00015724	Similar to FUS6 Efflux pump FUS6 (Gibberella moniliformis (strain M3125 / FGSC 7600))	GO:0055085;GO:0016021
unitig_821:1885426	0.05533	0.01033	8.38369e-06	0.999923	7.67165e-05	5.31727e-06	6.83328e-05	4.69078e-06	0.0373524	0.0100345	intergenic	CRV2G00008512(dist=18561),CRV2G00008513(dist=7688)	CRV2G00008512	Similar to CHS8 Chitin synthase 8 (Ustilago maydis (strain 521 / FGSC 9021))	GO:0016758
unitig_821:1885435	0.05533	0.01033	8.38369e-06	0.999923	7.67165e-05	5.56604e-06	6.83328e-05	4.91331e-06	0.0373524	0.0100345	intergenic	CRV2G00008512(dist=18570),CRV2G00008513(dist=7679)	CRV2G00008512	Similar to CHS8 Chitin synthase 8 (Ustilago maydis (strain 521 / FGSC 9021))	GO:0016758
unitig_821:1885476	0.05533	0.01033	8.38369e-06	0.999923	7.67165e-05	5.81309e-06	6.83328e-05	5.13428e-06	0.0373524	0.0100345	intergenic	CRV2G00008512(dist=18611),CRV2G00008513(dist=7638)	CRV2G00008512	Similar to CHS8 Chitin synthase 8 (Ustilago maydis (strain 521 / FGSC 9021))	GO:0016758
unitig_818:205077	-0.0375	0.007545	0.999921	6.89947e-06	7.86697e-05	6.06519e-06	7.17702e-05	5.5901e-06	-0.0311748	0.00598744	downstream	CRV2G00017630(dist=720)	CRV2G00017630	Protein of unknown function	GO:0003677;GO:0046872
unitig_693:14226	-0.0365	0.007371	0.99992	6.85533e-06	7.95985e-05	6.31876e-06	7.27432e-05	5.82166e-06	-0.0308049	0.0060931	upstream	CRV2G00019699(dist=228)	CRV2G00019699	Protein of unknown function	0
unitig_693:1159	0.03092	0.006331	6.12947e-06	0.999919	8.08866e-05	6.575e-06	7.47571e-05	6.29327e-06	0.0277305	0.00674362	downstream	CRV2G00019697,CRV2G00019698(dist=463)	CRV2G00019697	Protein of unknown function	0
unitig_122:267	-0.0345	0.007022	0.999916	6.94507e-06	8.37397e-05	6.83927e-06	7.67946e-05	6.53389e-06	-0.0299137	0.00634826	exonic	CRV2G00022199	CRV2G00022199	Protein of unknown function	0
unitig_235:4753	0.05692	0.0106	9.36858e-06	0.999916	8.39651e-05	7.10249e-06	7.45965e-05	6.058e-06	0.0383792	0.0110453	exonic	CRV2G00021940	CRV2G00021940	Protein of unknown function	0
unitig_59:1897	0.02725	0.005629	5.97969e-06	0.999913	8.73353e-05	7.3754e-06	8.13557e-05	6.78839e-06	0.0242571	0.00676999	intergenic	NONE(dist=NONE),NONE(dist=NONE)		#N/A	#N/A
scf_014:997436	-0.04462	0.008803	0.999904	9.48314e-06	9.56009e-05	7.67446e-06	8.61178e-05	7.0573e-06	-0.0330269	0.00599973	intergenic	CRV2G00012293(dist=29433),CRV2G00012294(dist=1057)	CRV2G00012293	Protein of unknown function	GO:0005975;GO:0003824
unitig_793:492272	0.04692	0.009168	9.86126e-06	0.999903	9.6628e-05	7.97498e-06	8.67668e-05	7.32659e-06	0.0336195	0.00636031	intergenic	CRV2G00016659(dist=15419),NONE(dist=NONE)	CRV2G00016659	Protein of unknown function	GO:0005515
unitig_170:11198	0.04667	0.009144	1.02463e-05	0.9999	0.000100408	8.28621e-06	9.01616e-05	7.60549e-06	0.0335315	0.00632498	intergenic	NONE(dist=NONE),CRV2G00019604(dist=2135)	CRV2G00019604	Protein of unknown function	0
unitig_196:70622	-0.04567	0.008988	0.999899	1.01377e-05	0.000100514	8.5957e-06	9.03764e-05	7.88325e-06	-0.0332671	0.0061532	upstream	CRV2G00019390,CRV2G00019391(dist=367)	CRV2G00019390	Protein of unknown function	0
unitig_41:287205	0.04163	0.008376	1.0867e-05	0.999887	0.000112697	8.94386e-06	0.00010183	8.19745e-06	0.032196	0.00594553	intergenic	CRV2G00016400(dist=3628),CRV2G00016401(dist=14146)	CRV2G00016400	Protein of unknown function	0
scf_014:975007	-0.0335	0.006928	0.999886	9.43212e-06	0.000113588	9.29267e-06	0.000104156	8.51731e-06	-0.0292233	0.00660787	intergenic	CRV2G00012293(dist=7004),CRV2G00012294(dist=23486)	CRV2G00012293	Protein of unknown function	GO:0005975;GO:0003824
unitig_491:14865	0.02483	0.005235	7.93642e-06	0.999878	0.000121861	9.66665e-06	0.000113924	8.8675e-06	0.0213726	0.00629502	splicing	CRV2G00021054(CRV2T00021054_1:exon1:c.66+1G>A)	CRV2G00021054	Protein of unknown function	0
unitig_65:7989	0.0245	0.005196	8.78534e-06	0.999865	0.00013515	1.00822e-05	0.000126364	9.63406e-06	0.0209588	0.00620352	intergenic	CRV2G00022167(dist=6224),NONE(dist=NONE)	CRV2G00022167	Similar to mug14 Meiotically up-regulated gene 14 protein (Schizosaccharomyces pombe (strain 972 / ATCC 24843))	0
unitig_132:1936	0.03542	0.007346	1.19032e-05	0.999864	0.00013554	1.04962e-05	0.000123636	9.24753e-06	0.0300618	0.0064688	upstream	CRV2G00021817(dist=703)	CRV2G00021817	Similar to SPBC13G1.02 Probable mannose-1-phosphate guanyltransferase (Schizosaccharomyces pombe (strain 972 / ATCC 24843))	GO:0009058;GO:0016779
unitig_601:501	-0.02	0.00433	0.999859	7.87224e-06	0.000141184	1.09261e-05	0.000133312	1.00409e-05	-0.016612	0.00428229	exonic	CRV2G00019328	CRV2G00019328	Similar to HET-E1 Vegetative incompatibility protein HET-E-1 (Podospora anserina)	0
unitig_601:522	-0.02	0.00433	0.999859	7.87224e-06	0.000141184	1.13532e-05	0.000133312	1.04451e-05	-0.016612	0.00428229	exonic	CRV2G00019328	CRV2G00019328	Similar to HET-E1 Vegetative incompatibility protein HET-E-1 (Podospora anserina)	0
unitig_601:540	-0.02	0.00433	0.999859	7.87224e-06	0.000141184	1.17775e-05	0.000133312	1.08466e-05	-0.016612	0.00428229	exonic	CRV2G00019328	CRV2G00019328	Similar to HET-E1 Vegetative incompatibility protein HET-E-1 (Podospora anserina)	0
unitig_200:28246	-0.02	0.00433	0.999859	7.87224e-06	0.000141184	1.2199e-05	0.000133312	1.12455e-05	-0.016612	0.00428229	intergenic	CRV2G00019727(dist=2733),CRV2G00019728(dist=2683)	CRV2G00019727	Protein of unknown function	0
unitig_200:28471	-0.02	0.00433	0.999859	7.87224e-06	0.000141184	1.26178e-05	0.000133312	1.16418e-05	-0.016612	0.00428229	intergenic	CRV2G00019727(dist=2958),CRV2G00019728(dist=2458)	CRV2G00019727	Protein of unknown function	0
unitig_200:28607	-0.02	0.00433	0.999859	7.87224e-06	0.000141184	1.30338e-05	0.000133312	1.20356e-05	-0.016612	0.00428229	intergenic	CRV2G00019727(dist=3094),CRV2G00019728(dist=2322)	CRV2G00019727	Protein of unknown function	0
unitig_200:29391	-0.02	0.00433	0.999859	7.87224e-06	0.000141184	1.34472e-05	0.000133312	1.24268e-05	-0.016612	0.00428229	intergenic	CRV2G00019727(dist=3878),CRV2G00019728(dist=1538)	CRV2G00019727	Protein of unknown function	0
unitig_200:29418	-0.02	0.00433	0.999859	7.87224e-06	0.000141184	1.3858e-05	0.000133312	1.28155e-05	-0.016612	0.00428229	intergenic	CRV2G00019727(dist=3905),CRV2G00019728(dist=1511)	CRV2G00019727	Protein of unknown function	0
unitig_200:30384	-0.02	0.00433	0.999859	7.87224e-06	0.000141184	1.42661e-05	0.000133312	1.32017e-05	-0.016612	0.00428229	downstream	CRV2G00019728(dist=545)	CRV2G00019728	Protein of unknown function	0
unitig_200:30742	-0.02	0.00433	0.999859	7.87224e-06	0.000141184	1.46716e-05	0.000133312	1.35854e-05	-0.016612	0.00428229	downstream	CRV2G00019728(dist=187)	CRV2G00019728	Protein of unknown function	0
unitig_818:287783	0.04136	0.008434	1.46397e-05	0.999851	0.00014919	1.51e-05	0.000134551	1.39707e-05	0.0319703	0.00609489	upstream	CRV2G00017650(dist=316)	CRV2G00017650	Protein of unknown function	0
unitig_83:3607	-0.02167	0.004667	0.99985	8.91706e-06	0.000149699	1.55273e-05	0.000140782	1.43732e-05	-0.0179969	0.00500473	downstream	CRV2G00020335(dist=94)	CRV2G00020335	Protein of unknown function	0
unitig_595:37960	-0.021	0.004538	0.99985	8.75142e-06	0.000150404	1.59541e-05	0.000141652	1.4776e-05	-0.0174038	0.00470741	downstream	CRV2G00019129(dist=163)	CRV2G00019129	Protein of unknown function	GO:0003677
unitig_34:4285	-0.017	0.003775	0.999832	8.42503e-06	0.000168297	1.64347e-05	0.000159872	1.56804e-05	-0.0145366	0.00341767	upstream;downstream	CRV2G00020327(dist=456);CRV2G00020325,CRV2G00020326(dist=377)	CRV2G00020327	Protein of unknown function	GO:0008081;GO:0046872
unitig_821:1849867	-0.041	0.008432	0.999825	1.72451e-05	0.000174531	1.69318e-05	0.000157286	1.52256e-05	-0.0317825	0.00618733	intergenic	CRV2G00008510(dist=17894),CRV2G00008511(dist=13078)	CRV2G00008510	Protein of unknown function	0
unitig_818:46952	-0.0475	0.009526	0.999813	2.01872e-05	0.000187044	1.74651e-05	0.000166857	1.66236e-05	-0.0334126	0.00677085	downstream	CRV2G00017597(dist=373)	CRV2G00017597	Similar to NPHP3 Nephrocystin-3 (Homo sapiens)	GO:0005515
unitig_823:634657	-0.0475	0.009526	0.999813	2.01872e-05	0.000187044	1.7995e-05	0.000166857	1.70917e-05	-0.0334126	0.00677085	intergenic	CRV2G00015724(dist=9360),NONE(dist=NONE)	CRV2G00015724	Similar to FUS6 Efflux pump FUS6 (Gibberella moniliformis (strain M3125 / FGSC 7600))	GO:0055085;GO:0016021
unitig_161:13327	0.05225	0.01026	2.12487e-05	0.999812	0.000187576	1.85233e-05	0.000166327	1.61527e-05	0.0350389	0.0083926	downstream	CRV2G00020634(dist=219)	CRV2G00020634	Protein of unknown function	0
unitig_821:2514615	-0.026	0.00559	0.999808	1.35045e-05	0.000191789	1.90614e-05	0.000178284	1.75923e-05	-0.0224981	0.00676505	exonic	CRV2G00008707	CRV2G00008707	Protein of unknown function	GO:0017111;GO:0005524;GO:0000166
scf_001:9709	0.03269	0.006949	1.68172e-05	0.999803	0.000197303	1.96132e-05	0.000180485	1.80966e-05	0.0284083	0.00695549	intergenic	NONE(dist=NONE),CRV2G00003338(dist=11035)	CRV2G00003338	Protein of unknown function	0
unitig_821:1898140	-0.04394	0.008994	0.999793	2.15776e-05	0.000206904	2.01913e-05	0.000185327	1.86127e-05	-0.032429	0.00633601	exonic	CRV2G00008514	CRV2G00008514	Protein of unknown function	0
unitig_723:88877	-0.037	0.007794	0.999788	1.98919e-05	0.000211845	2.0781e-05	0.000191953	1.91461e-05	-0.0304143	0.00654267	downstream	CRV2G00016687(dist=368)	CRV2G00016687	Protein of unknown function	0
unitig_823:637646	-0.037	0.007794	0.999788	1.98919e-05	0.000211845	2.13671e-05	0.000191953	1.96762e-05	-0.0304143	0.00654267	intergenic	CRV2G00015724(dist=12349),NONE(dist=NONE)	CRV2G00015724	Similar to FUS6 Efflux pump FUS6 (Gibberella moniliformis (strain M3125 / FGSC 7600))	GO:0055085;GO:0016021
unitig_823:637701	-0.037	0.007794	0.999788	1.98919e-05	0.000211845	2.19496e-05	0.000191953	2.0203e-05	-0.0304143	0.00654267	intergenic	CRV2G00015724(dist=12404),NONE(dist=NONE)	CRV2G00015724	Similar to FUS6 Efflux pump FUS6 (Gibberella moniliformis (strain M3125 / FGSC 7600))	GO:0055085;GO:0016021
unitig_823:637706	-0.037	0.007794	0.999788	1.98919e-05	0.000211845	2.25285e-05	0.000191953	2.07266e-05	-0.0304143	0.00654267	intergenic	CRV2G00015724(dist=12409),NONE(dist=NONE)	CRV2G00015724	Similar to FUS6 Efflux pump FUS6 (Gibberella moniliformis (strain M3125 / FGSC 7600))	GO:0055085;GO:0016021
unitig_823:637723	-0.037	0.007794	0.999788	1.98919e-05	0.000211845	2.31039e-05	0.000191953	2.12471e-05	-0.0304143	0.00654267	intergenic	CRV2G00015724(dist=12426),NONE(dist=NONE)	CRV2G00015724	Similar to FUS6 Efflux pump FUS6 (Gibberella moniliformis (strain M3125 / FGSC 7600))	GO:0055085;GO:0016021
unitig_823:637782	-0.037	0.007794	0.999788	1.98919e-05	0.000211845	2.36759e-05	0.000191953	2.17644e-05	-0.0304143	0.00654267	intergenic	CRV2G00015724(dist=12485),NONE(dist=NONE)	CRV2G00015724	Similar to FUS6 Efflux pump FUS6 (Gibberella moniliformis (strain M3125 / FGSC 7600))	GO:0055085;GO:0016021
scf_022:3436944	-0.037	0.007794	0.999788	1.98919e-05	0.000211845	2.42444e-05	0.000191953	2.22785e-05	-0.0304143	0.00654267	intergenic	CRV2G00005838(dist=13797),CRV2G00005839(dist=23652)	CRV2G00005838	Protein of unknown function	GO:0016772
scf_022:3436965	-0.037	0.007794	0.999788	1.98919e-05	0.000211845	2.48094e-05	0.000191953	2.27896e-05	-0.0304143	0.00654267	intergenic	CRV2G00005838(dist=13818),CRV2G00005839(dist=23631)	CRV2G00005838	Protein of unknown function	GO:0016772
scf_022:3436979	-0.037	0.007794	0.999788	1.98919e-05	0.000211845	2.53711e-05	0.000191953	2.32976e-05	-0.0304143	0.00654267	intergenic	CRV2G00005838(dist=13832),CRV2G00005839(dist=23617)	CRV2G00005838	Protein of unknown function	GO:0016772
scf_001:3844862	0.03873	0.008126	2.1589e-05	0.999778	0.000222149	2.59603e-05	0.00020056	2.38283e-05	0.0309736	0.00643049	intergenic	CRV2G00004612(dist=5193),CRV2G00004613(dist=18598)	CRV2G00004612	Protein of unknown function	GO:0055085;GO:0016021
unitig_731:5051	0.018	0.004041	1.23726e-05	0.99977	0.000229506	2.65679e-05	0.000217134	2.60802e-05	0.0151091	0.0037108	upstream	CRV2G00021751(dist=301)	CRV2G00021751	Protein of unknown function	0
unitig_65:7932	0.02683	0.005812	1.69177e-05	0.99977	0.000230246	2.7174e-05	0.000213328	2.49469e-05	0.0233157	0.00700152	intergenic	CRV2G00022167(dist=6167),NONE(dist=NONE)	CRV2G00022167	Similar to mug14 Meiotically up-regulated gene 14 protein (Schizosaccharomyces pombe (strain 972 / ATCC 24843))	0
unitig_818:39302	-0.0435	0.008973	0.999765	2.45901e-05	0.000234772	2.77901e-05	0.000210182	2.43846e-05	-0.0322403	0.00638358	exonic	CRV2G00017594	CRV2G00017594	Protein of unknown function	0
unitig_189:11551	-0.0425	0.008815	0.999759	2.49315e-05	0.000240744	2.84201e-05	0.000215812	2.55133e-05	-0.0319726	0.00636682	downstream	CRV2G00021917(dist=9)	CRV2G00021917	Protein of unknown function	0
scf_003:427794	0.05408	0.01067	2.93342e-05	0.999751	0.000249177	2.90713e-05	0.000219843	2.66518e-05	0.0356503	0.00934058	intergenic	CRV2G00007051(dist=32029),CRV2G00007052(dist=32486)	CRV2G00007051	Protein of unknown function	0
unitig_182:7742	-0.02475	0.005419	0.999743	1.78799e-05	0.000257321	2.97426e-05	0.000239441	2.78881e-05	-0.0209699	0.006459	exonic	CRV2G00021296	CRV2G00021296	Similar to hsps-1 Heat shock 70 kDa protein (Neurospora crassa (strain ATCC 24698 / 74-OR23-1A / CBS 708.71 / DSM 1257 / FGSC 987))	0
unitig_228:219081	0.035	0.0075	2.43763e-05	0.999735	0.00026498	3.04325e-05	0.000240604	2.85101e-05	0.0294321	0.00686438	intergenic	CRV2G00018591(dist=5657),CRV2G00018592(dist=8483)	CRV2G00018591	Protein of unknown function	0
scf_014:1003801	-0.07775	0.01429	0.999725	3.92969e-05	0.000274753	3.11469e-05	0.000235456	2.72659e-05	-0.0537642	0.0171868	intergenic	CRV2G00012294(dist=4918),CRV2G00012295(dist=8849)	CRV2G00012294	Protein of unknown function	0
scf_014:972442	-0.03583	0.007688	0.999713	2.70432e-05	0.000287128	3.18932e-05	0.000260085	2.98434e-05	-0.0297407	0.0068256	intergenic	CRV2G00012293(dist=4439),CRV2G00012294(dist=26051)	CRV2G00012293	Protein of unknown function	GO:0005975;GO:0003824
unitig_673:139847	0.04954	0.01004	3.29083e-05	0.999711	0.000288506	3.26391e-05	0.000255598	2.91722e-05	0.0337373	0.00749981	upstream	CRV2G00018930(dist=41)	CRV2G00018930	Protein of unknown function	GO:0005515
scf_014:1008679	-0.0275	0.006027	0.999704	2.27322e-05	0.000296198	3.34031e-05	0.000273466	3.12515e-05	-0.0238771	0.00719116	intergenic	CRV2G00012294(dist=9796),CRV2G00012295(dist=3971)	CRV2G00012294	Protein of unknown function	0
unitig_659:35987	0.05442	0.01083	3.73268e-05	0.999689	0.000310751	3.42047e-05	0.000273424	3.05495e-05	0.0356181	0.00954464	intergenic	CRV2G00019287(dist=6750),CRV2G00019288(dist=6239)	CRV2G00019287	Similar to hsp30 30 kDa heat shock protein (Emericella nidulans (strain FGSC A4 / ATCC 38163 / CBS 112.46 / NRRL 194 / M139))	0
unitig_196:65400	-0.03375	0.007361	0.999648	3.22767e-05	0.000351627	3.51194e-05	0.00031935	3.28937e-05	-0.0286004	0.00714405	intergenic	CRV2G00019387(dist=2383),CRV2G00019388(dist=1740)	CRV2G00019387	Protein of unknown function	GO:0003676;GO:0003677
unitig_196:65466	-0.03375	0.007361	0.999648	3.22767e-05	0.000351627	3.60289e-05	0.00031935	3.37145e-05	-0.0286004	0.00714405	intergenic	CRV2G00019387(dist=2449),CRV2G00019388(dist=1674)	CRV2G00019387	Protein of unknown function	GO:0003676;GO:0003677
unitig_333:208629	0.0475	0.009812	4.02997e-05	0.999645	0.00035494	3.69427e-05	0.000314641	3.20682e-05	0.0329888	0.00709568	intergenic	CRV2G00018666(dist=29565),CRV2G00018668(dist=3087)	CRV2G00018666	Protein of unknown function	GO:0003676;GO:0046872
unitig_464:5618	0.05088	0.01036	4.27198e-05	0.999637	0.000362909	3.7874e-05	0.000320189	3.4533e-05	0.0340132	0.00803731	intergenic	CRV2G00021614(dist=1308),CRV2G00021615(dist=4626)	CRV2G00021614	Protein of unknown function	GO:0055114;GO:0008703;GO:0009231
unitig_659:103038	0.03067	0.006764	3.23109e-05	0.999623	0.000376667	3.88393e-05	0.000344356	3.62907e-05	0.0265655	0.00740685	intergenic	CRV2G00019300(dist=2074),NONE(dist=NONE)	CRV2G00019300	Similar to HET-E1 Vegetative incompatibility protein HET-E-1 (Podospora anserina)	GO:0005515
scf_014:987050	-0.03267	0.007172	0.999623	3.40225e-05	0.000377448	3.98012e-05	0.000343426	3.54131e-05	-0.02793	0.00727951	intergenic	CRV2G00012293(dist=19047),CRV2G00012294(dist=11443)	CRV2G00012293	Protein of unknown function	GO:0005975;GO:0003824
unitig_332:13273	0.04261	0.009039	4.20486e-05	0.99961	0.0003897	4.07924e-05	0.000347652	3.71728e-05	0.031668	0.00666803	intergenic	NONE(dist=NONE),CRV2G00019989(dist=3745)	CRV2G00019989	Protein of unknown function	0
unitig_507:7654	-0.02925	0.006495	0.999595	3.36925e-05	0.000405303	4.18221e-05	0.000371611	3.90569e-05	-0.0253436	0.00744715	intergenic	NONE(dist=NONE),NONE(dist=NONE)		#N/A	#N/A
unitig_489:3545	0.02925	0.006495	3.36925e-05	0.999595	0.000405303	4.2846e-05	0.000371611	3.81175e-05	0.0253436	0.00744715	intergenic	NONE(dist=NONE),NONE(dist=NONE)		#N/A	#N/A
scf_022:2309746	0.02918	0.006481	3.36934e-05	0.999594	0.000406034	4.38662e-05	0.000372341	3.99931e-05	0.0252805	0.00744568	intergenic	CRV2G00005444(dist=20664),CRV2G00005445(dist=33807)	CRV2G00005444	Protein of unknown function	0
unitig_1:437099	-0.0305	0.00677	0.999577	3.64941e-05	0.000422791	4.49276e-05	0.000386297	4.19026e-05	-0.0263475	0.00746461	intergenic	CRV2G00013600(dist=7817),CRV2G00013601(dist=32786)	CRV2G00013600	Similar to paxP Cytochrome P450 monooxygenase paxP (Penicillium paxilli)	GO:0016705;GO:0055114;GO:0020037;GO:0004497;GO:0005506
scf_003:2872159	0.02162	0.004924	2.79417e-05	0.999575	0.000425097	4.59895e-05	0.000397156	4.28922e-05	0.0176298	0.00521421	exonic	CRV2G00007803	CRV2G00007803	Similar to FRQ Frequency clock protein (Trichoderma spinulosum)	GO:0007623;GO:0005737;GO:0006355;GO:0005634
unitig_71:2862	-0.04567	0.009597	0.999575	4.80219e-05	0.000425301	4.70461e-05	0.000377279	4.09379e-05	-0.0323746	0.0069196	downstream	CRV2G00021992(dist=714)	CRV2G00021992	Protein of unknown function	GO:0055114;GO:0016491
unitig_200:31994	0.03834	0.008354	4.80755e-05	0.999532	0.000467607	4.82143e-05	0.000419532	4.39384e-05	0.0303035	0.00691534	upstream	CRV2G00019728(dist=312)	CRV2G00019728	Protein of unknown function	0
unitig_842:22299	0.03771	0.008254	4.97657e-05	0.999513	0.000487475	4.94311e-05	0.000437709	4.61026e-05	0.0300543	0.00698647	downstream	CRV2G00020026(dist=729)	CRV2G00020026	Protein of unknown function	0
unitig_595:33322	0.0705	0.01355	7.15839e-05	0.999495	0.000505215	5.06902e-05	0.000433631	4.50179e-05	0.046597	0.0168244	intergenic	CRV2G00019127(dist=3428),CRV2G00019128(dist=1529)	CRV2G00019127	Protein of unknown function	0
scf_003:419876	0.06492	0.0127	6.92331e-05	0.999491	0.000509103	5.19531e-05	0.00043987	4.71874e-05	0.0420379	0.0150149	intergenic	CRV2G00007051(dist=24111),CRV2G00007052(dist=40404)	CRV2G00007051	Protein of unknown function	0
unitig_693:1197	-0.03427	0.007609	0.999488	4.9131e-05	0.000511742	5.32162e-05	0.00046261	4.83287e-05	-0.0285678	0.00730753	downstream	CRV2G00019697,CRV2G00019698(dist=425)	CRV2G00019697	Protein of unknown function	0
unitig_821:2191025	0.03523	0.007807	5.12653e-05	0.999477	0.000522575	5.45021e-05	0.00047131	4.94875e-05	0.029008	0.00723515	intergenic	CRV2G00008612(dist=9264),CRV2G00008613(dist=3207)	CRV2G00008612	Similar to TP53I3 Quinone oxidoreductase PIG3 (Homo sapiens)	GO:0055114;GO:0016747;GO:0008270;GO:0016491
scf_003:2887343	0.03805	0.008357	5.53029e-05	0.999466	0.000534212	5.58128e-05	0.000478909	5.06608e-05	0.0300959	0.00702294	intergenic	CRV2G00007810(dist=1287),CRV2G00007811(dist=1297)	CRV2G00007810	Protein of unknown function	0
unitig_429:7187	-0.0295	0.006658	0.999448	4.76275e-05	0.000552472	5.71661e-05	0.000504844	5.3088e-05	-0.025328	0.00758327	intergenic	NONE(dist=NONE),NONE(dist=NONE)		#N/A	#N/A
scf_024:1034473	-0.0647	0.01273	0.999433	7.76643e-05	0.000567331	5.85524e-05	0.000489667	5.1857e-05	-0.0416192	0.0148896	intergenic	CRV2G00013428(dist=5965),CRV2G00013429(dist=10256)	CRV2G00013428	Similar to Ache Acetylcholinesterase (Mus musculus)	0
unitig_659:31034	0.03887	0.008539	6.02533e-05	0.999429	0.000570818	5.99407e-05	0.000510565	5.43277e-05	0.0303105	0.00701675	intergenic	CRV2G00019287(dist=1797),CRV2G00019288(dist=11192)	CRV2G00019287	Similar to hsp30 30 kDa heat shock protein (Emericella nidulans (strain FGSC A4 / ATCC 38163 / CBS 112.46 / NRRL 194 / M139))	0
unitig_659:31170	0.05019	0.01053	7.6749e-05	0.999373	0.000627272	6.1474e-05	0.000550523	5.56688e-05	0.0333251	0.00806816	intergenic	CRV2G00019287(dist=1933),CRV2G00019288(dist=11056)	CRV2G00019287	Similar to hsp30 30 kDa heat shock protein (Emericella nidulans (strain FGSC A4 / ATCC 38163 / CBS 112.46 / NRRL 194 / M139))	0
unitig_336:12836	0.04092	0.008969	7.08427e-05	0.999356	0.000643592	6.30431e-05	0.00057275	5.70626e-05	0.0308166	0.00701977	intronic	CRV2G00020642	CRV2G00020642	Protein of unknown function	0
unitig_320:1245	-0.02408	0.005561	0.999354	4.81449e-05	0.000646421	6.46113e-05	0.000598276	6.13548e-05	-0.0198247	0.00644573	intergenic	NONE(dist=NONE),CRV2G00021711(dist=2895)	CRV2G00021711	Protein of unknown function	0
unitig_354:9850	0.02025	0.004763	4.27062e-05	0.999348	0.000652031	6.61861e-05	0.000609325	6.56835e-05	0.0163811	0.00470747	intergenic	NONE(dist=NONE),NONE(dist=NONE)		#N/A	#N/A
unitig_785:14577	-0.0395	0.008718	0.999345	7.07398e-05	0.000655357	6.77614e-05	0.000584617	5.84807e-05	-0.0303875	0.00708112	intergenic	NONE(dist=NONE),CRV2G00019352(dist=8672)	CRV2G00019352	Protein of unknown function	0
scf_003:2818081	0.03637	0.008129	6.77571e-05	0.999339	0.000661335	6.93443e-05	0.000593578	5.99153e-05	0.0292876	0.00728956	exonic	CRV2G00007784	CRV2G00007784	Similar to PSD2 Phosphatidylserine decarboxylase proenzyme 2 (Oryza sativa subsp. japonica)	GO:0004609;GO:0008654
unitig_818:49455	-0.05375	0.01115	0.999309	8.81115e-05	0.000691444	7.09988e-05	0.000603332	6.28e-05	-0.0345241	0.00940634	exonic	CRV2G00017597	CRV2G00017597	Similar to NPHP3 Nephrocystin-3 (Homo sapiens)	GO:0005515
unitig_818:53101	-0.05375	0.01115	0.999309	8.81115e-05	0.000691444	7.26446e-05	0.000603332	6.42376e-05	-0.0345241	0.00940634	upstream	CRV2G00017597(dist=581)	CRV2G00017597	Similar to NPHP3 Nephrocystin-3 (Homo sapiens)	GO:0005515
unitig_633:14719	0.04493	0.009721	8.28774e-05	0.999291	0.000708635	7.43271e-05	0.000625758	6.71651e-05	0.0317744	0.00719339	intergenic	NONE(dist=NONE),NONE(dist=NONE)		#N/A	#N/A
unitig_626:409566	0.0435	0.0095	8.62922e-05	0.999253	0.000747236	7.61026e-05	0.000660944	7.02899e-05	0.0313668	0.00714789	intergenic	CRV2G00017143(dist=36172),CRV2G00017144(dist=12647)	CRV2G00017143	Protein of unknown function	0
scf_003:433768	0.05217	0.01095	9.58159e-05	0.999243	0.000756618	7.78934e-05	0.000660802	6.87315e-05	0.0338185	0.00881267	intergenic	CRV2G00007051(dist=38003),CRV2G00007052(dist=26512)	CRV2G00007051	Protein of unknown function	0
scf_014:996838	-0.018	0.00433	0.999243	4.6238e-05	0.000757236	7.96765e-05	0.000710998	7.68968e-05	-0.0148236	0.00393625	intergenic	CRV2G00012293(dist=28835),CRV2G00012294(dist=1655)	CRV2G00012293	Protein of unknown function	GO:0005975;GO:0003824
scf_014:996880	-0.018	0.00433	0.999243	4.6238e-05	0.000757236	8.14502e-05	0.000710998	7.85438e-05	-0.0148236	0.00393625	intergenic	CRV2G00012293(dist=28877),CRV2G00012294(dist=1613)	CRV2G00012293	Protein of unknown function	GO:0005975;GO:0003824
unitig_659:102829	0.03318	0.007565	7.66497e-05	0.999215	0.000785117	8.32874e-05	0.000708467	7.52412e-05	0.0276038	0.00764406	intergenic	CRV2G00019300(dist=1865),NONE(dist=NONE)	CRV2G00019300	Similar to HET-E1 Vegetative incompatibility protein HET-E-1 (Podospora anserina)	GO:0005515
unitig_818:285271	0.03962	0.008825	8.63867e-05	0.999214	0.00078576	8.51168e-05	0.000699373	7.19411e-05	0.0302598	0.00720739	intergenic	CRV2G00017649(dist=2610),CRV2G00017650(dist=2828)	CRV2G00017649	Protein of unknown function	0
unitig_818:285303	0.03962	0.008825	8.63867e-05	0.999214	0.00078576	8.69366e-05	0.000699373	7.35835e-05	0.0302598	0.00720739	intergenic	CRV2G00017649(dist=2642),CRV2G00017650(dist=2796)	CRV2G00017649	Protein of unknown function	0
unitig_242:8469	0.03362	0.007662	7.87648e-05	0.999202	0.000797855	8.87784e-05	0.00071909	8.02033e-05	0.0278317	0.00762324	upstream	CRV2G00019058(dist=765)	CRV2G00019058	Protein of unknown function	GO:0046872
scf_003:434291	0.05192	0.01096	0.000105249	0.999173	0.000826639	9.0685e-05	0.00072139	8.18601e-05	0.0336397	0.00876457	intergenic	CRV2G00007051(dist=38526),CRV2G00007052(dist=25989)	CRV2G00007051	Protein of unknown function	0
unitig_327:8706	0.014	0.003464	4.2462e-05	0.999162	0.000838059	9.26112e-05	0.000795597	8.89484e-05	0.01241	0.0030417	downstream	CRV2G00020889,CRV2G00020890(dist=259)	CRV2G00020889	Protein of unknown function	GO:0003677;GO:0046872
unitig_64:6303	0.026	0.006062	6.83041e-05	0.99916	0.000840184	9.4533e-05	0.00077188	8.71365e-05	0.0216685	0.00721288	intergenic	CRV2G00020976(dist=4869),CRV2G00020977(dist=8078)	CRV2G00020976	Similar to mug14 Meiotically up-regulated gene 14 protein (Schizosaccharomyces pombe (strain 972 / ATCC 24843))	0
unitig_659:104005	0.03373	0.00771	8.42439e-05	0.999154	0.00084649	9.64611e-05	0.000762246	8.36137e-05	0.0278342	0.00765135	intergenic	CRV2G00019300(dist=3041),NONE(dist=NONE)	CRV2G00019300	Similar to HET-E1 Vegetative incompatibility protein HET-E-1 (Podospora anserina)	GO:0005515
scf_003:2818144	0.03571	0.008115	8.90011e-05	0.999142	0.000858239	9.84094e-05	0.000769238	8.53762e-05	0.028769	0.00751395	intronic	CRV2G00007784	CRV2G00007784	Similar to PSD2 Phosphatidylserine decarboxylase proenzyme 2 (Oryza sativa subsp. japonica)	GO:0004609;GO:0008654
unitig_673:165007	-0.047	0.01021	0.999081	0.000112625	0.000919405	0.000100504	0.000806779	9.07796e-05	-0.0320664	0.00761904	intergenic	CRV2G00018936(dist=1198),NONE(dist=NONE)	CRV2G00018936	Protein of unknown function	GO:0005524;GO:0016772;GO:0006468;GO:0004672
unitig_673:136555	-0.043	0.009526	0.999064	0.000109564	0.000935555	0.000102629	0.000825991	9.26504e-05	-0.0310312	0.00730428	upstream	CRV2G00018929(dist=714)	CRV2G00018929	Protein of unknown function	0
unitig_673:136619	-0.043	0.009526	0.999064	0.000109564	0.000935555	0.000104743	0.000825991	9.45116e-05	-0.0310312	0.00730428	upstream	CRV2G00018929(dist=778)	CRV2G00018929	Protein of unknown function	0
unitig_673:136633	-0.043	0.009526	0.999064	0.000109564	0.000935555	0.000106846	0.000825991	9.63635e-05	-0.0310312	0.00730428	upstream	CRV2G00018929(dist=792)	CRV2G00018929	Protein of unknown function	0
unitig_673:136647	-0.043	0.009526	0.999064	0.000109564	0.000935555	0.000108939	0.000825991	9.8206e-05	-0.0310312	0.00730428	upstream	CRV2G00018929(dist=806)	CRV2G00018929	Protein of unknown function	0
unitig_673:136657	-0.043	0.009526	0.999064	0.000109564	0.000935555	0.000111021	0.000825991	0.000100039	-0.0310312	0.00730428	upstream	CRV2G00018929(dist=816)	CRV2G00018929	Protein of unknown function	0
unitig_673:136944	-0.043	0.009526	0.999064	0.000109564	0.000935555	0.000113092	0.000825991	0.000101863	-0.0310312	0.00730428	intergenic	CRV2G00018929(dist=1103),CRV2G00018930(dist=1774)	CRV2G00018929	Protein of unknown function	0
unitig_673:136970	-0.043	0.009526	0.999064	0.000109564	0.000935555	0.000115154	0.000825991	0.000103678	-0.0310312	0.00730428	intergenic	CRV2G00018929(dist=1129),CRV2G00018930(dist=1748)	CRV2G00018929	Protein of unknown function	0
scf_022:3435934	-0.043	0.009526	0.999064	0.000109564	0.000935555	0.000117205	0.000825991	0.000105484	-0.0310312	0.00730428	intergenic	CRV2G00005838(dist=12787),CRV2G00005839(dist=24662)	CRV2G00005838	Protein of unknown function	GO:0016772
unitig_785:9331	0.0387	0.008745	0.00010522	0.999046	0.000953574	0.00011929	0.000848354	0.000107336	0.0297844	0.00739443	intergenic	NONE(dist=NONE),CRV2G00019352(dist=13918)	CRV2G00019352	Protein of unknown function	0
unitig_628:5411	0.03333	0.007688	9.71383e-05	0.999029	0.000971284	0.00012141	0.000874146	0.000109244	0.0274825	0.00776127	intergenic	NONE(dist=NONE),CRV2G00022104(dist=3504)	CRV2G00022104	Similar to SPCC736.13 Uncharacterized oxidoreductase C736.13 (Schizosaccharomyces pombe (strain 972 / ATCC 24843))	GO:0008152;GO:0016491
unitig_628:5615	0.03333	0.007688	9.71383e-05	0.999029	0.000971284	0.000123519	0.000874146	0.000111142	0.0274825	0.00776127	intergenic	NONE(dist=NONE),CRV2G00022104(dist=3300)	CRV2G00022104	Similar to SPCC736.13 Uncharacterized oxidoreductase C736.13 (Schizosaccharomyces pombe (strain 972 / ATCC 24843))	GO:0008152;GO:0016491
unitig_793:492782	0.0527	0.01122	0.000136191	0.998959	0.00104103	0.00012579	0.000904835	0.000113106	0.0336719	0.00915218	intergenic	CRV2G00016659(dist=15929),NONE(dist=NONE)	CRV2G00016659	Protein of unknown function	GO:0005515
scf_022:863001	-0.03079	0.00719	0.998942	0.000100612	0.00105788	0.000128091	0.000957272	0.000119272	-0.0257794	0.00790116	upstream	CRV2G00004935(dist=721)	CRV2G00004935	Protein of unknown function	0
unitig_105:233971	0.04312	0.009613	0.000125838	0.998939	0.00106053	0.000130388	0.000934692	0.000115135	0.0309396	0.00740717	intergenic	CRV2G00018099(dist=19485),CRV2G00018100(dist=11964)	CRV2G00018099	Similar to TIC32 Short-chain dehydrogenase TIC 32, chloroplastic (Arabidopsis thaliana)	GO:0008152;GO:0016491
unitig_114:734808	0.03575	0.008227	0.00011406	0.998925	0.00107534	0.00013271	0.000961284	0.000121335	0.0285601	0.00766523	intergenic	CRV2G00014625(dist=8860),NONE(dist=NONE)	CRV2G00014625	Protein of unknown function	0
unitig_114:734822	0.03575	0.008227	0.00011406	0.998925	0.00107534	0.00013502	0.000961284	0.000123389	0.0285601	0.00766523	intergenic	CRV2G00014625(dist=8874),NONE(dist=NONE)	CRV2G00014625	Protein of unknown function	0
unitig_199:9473	-0.04385	0.009756	0.998913	0.000130445	0.00108698	0.000137348	0.000956535	0.000117207	-0.0311017	0.00745393	exonic	CRV2G00022137	CRV2G00022137	Similar to At5g05130 Putative SWI/SNF-related matrix-associated actin-dependent regulator of chromatin subfamily A member 3-like 1 (Arabidopsis thaliana)	GO:0005515;GO:0003677;GO:0005524;GO:0003676;GO:0004386;GO:0008270;GO:0016818
scf_003:400619	0.0515	0.01107	0.000146169	0.998878	0.00112174	0.000139749	0.000975571	0.000125467	0.0331738	0.00878614	intergenic	CRV2G00007051(dist=4854),CRV2G00007052(dist=59661)	CRV2G00007051	Protein of unknown function	0
unitig_6:2955	0.0245	0.005847	9.09348e-05	0.998866	0.00113395	0.000142168	0.00104301	0.000129867	0.0199501	0.00678297	exonic	CRV2G00021544	CRV2G00021544	Similar to abc1 Protein ABC1 homolog, mitochondrial (Schizosaccharomyces pombe (strain 972 / ATCC 24843))	GO:0016772
scf_025:778734	0.03545	0.008195	0.000121114	0.998858	0.0011416	0.000144593	0.00102049	0.000127645	0.0283671	0.00772698	intronic	CRV2G00012743	CRV2G00012743	Similar to codA Choline oxidase (Arthrobacter globiformis)	GO:0055114;GO:0050660;GO:0016614
scf_003:2804398	0.03039	0.007141	0.000109568	0.998847	0.00115325	0.000147036	0.00104369	0.000132079	0.0254005	0.00794144	upstream;downstream	CRV2G00007777(dist=373);CRV2G00007776,CRV2G00007778(dist=373)	CRV2G00007777	Protein of unknown function	GO:0005515
scf_003:2804408	0.03039	0.007141	0.000109568	0.998847	0.00115325	0.000149466	0.00104369	0.000134281	0.0254005	0.00794144	upstream;downstream	CRV2G00007777(dist=363);CRV2G00007776,CRV2G00007778(dist=363)	CRV2G00007777	Protein of unknown function	GO:0005515
unitig_333:207287	-0.03692	0.008501	0.998828	0.000128106	0.00117248	0.000151931	0.00104438	0.000136474	-0.0289433	0.0076507	intergenic	CRV2G00018666(dist=28223),CRV2G00018668(dist=4429)	CRV2G00018666	Protein of unknown function	GO:0003676;GO:0046872
unitig_152:18426	-0.04388	0.00983	0.998767	0.000149797	0.00123316	0.00015453	0.00108336	0.000138751	-0.0309804	0.00755868	upstream;downstream	CRV2G00019469(dist=235);CRV2G00019468(dist=969)	CRV2G00019469	Similar to ydcJ Uncharacterized protein YdcJ (Escherichia coli (strain K12))	0
unitig_152:18431	-0.04388	0.00983	0.998767	0.000149797	0.00123316	0.000157117	0.00108336	0.000141016	-0.0309804	0.00755868	upstream;downstream	CRV2G00019469(dist=230);CRV2G00019468(dist=974)	CRV2G00019469	Similar to ydcJ Uncharacterized protein YdcJ (Escherichia coli (strain K12))	0
unitig_152:18454	-0.04388	0.00983	0.998767	0.000149797	0.00123316	0.000159691	0.00108336	0.00014327	-0.0309804	0.00755868	upstream;downstream	CRV2G00019469(dist=207);CRV2G00019468(dist=997)	CRV2G00019469	Similar to ydcJ Uncharacterized protein YdcJ (Escherichia coli (strain K12))	0
unitig_882:15581	0.03011	0.007113	0.000118245	0.998756	0.00124353	0.000162278	0.00112529	0.000147915	0.0251142	0.00797162	intergenic	NONE(dist=NONE),NONE(dist=NONE)		#N/A	#N/A
unitig_170:18979	0.03485	0.008114	0.000131549	0.998756	0.00124373	0.000164853	0.00111219	0.000145583	0.0280026	0.00782487	upstream	CRV2G00019607,CRV2G00019608(dist=514)	CRV2G00019607	Protein of unknown function	GO:0016772
unitig_105:149410	0.02754	0.006557	0.000112441	0.998735	0.00126497	0.000167466	0.00115253	0.000152635	0.0228894	0.00771856	intergenic	CRV2G00018084(dist=8725),CRV2G00018085(dist=7847)	CRV2G00018084	Protein of unknown function	GO:0004601
unitig_793:7002	-0.04467	0.009997	0.998706	0.000159439	0.00129438	0.000170136	0.00113494	0.00015026	-0.0311295	0.00764367	intergenic	CRV2G00016485(dist=6319),CRV2G00016486(dist=4842)	CRV2G00016485	Protein of unknown function	0
unitig_766:8240	-0.01925	0.004763	0.998681	9.01583e-05	0.00131872	0.000172852	0.00122856	0.000167324	-0.015451	0.00448711	downstream	CRV2G00020077(dist=713)	CRV2G00020077	Protein of unknown function	0
scf_003:2804811	0.02979	0.007077	0.000127733	0.998657	0.00134327	0.000175612	0.00121554	0.000164839	0.0247894	0.00799569	intronic	CRV2G00007777	CRV2G00007777	Protein of unknown function	GO:0005515
unitig_51:6893	0.04771	0.01055	0.000173058	0.998646	0.00135358	0.000178384	0.00118052	0.000155065	0.0318601	0.0080223	UTR3	CRV2G00020982(CRV2T00020982_1:c.*869T>C)	CRV2G00020982	Protein of unknown function	GO:0016772
scf_014:998342	-0.04383	0.009877	0.998636	0.000167134	0.00136366	0.000181166	0.00119652	0.000162372	-0.030861	0.00764083	downstream	CRV2G00012294(dist=151)	CRV2G00012294	Protein of unknown function	0
unitig_624:26170	-0.0594	0.01247	0.998613	0.000196448	0.00138722	0.000183991	0.00119077	0.000157508	-0.0363104	0.0121703	intergenic	NONE(dist=NONE),CRV2G00019544(dist=18577)	CRV2G00019544	Protein of unknown function	0
unitig_624:26309	-0.0594	0.01247	0.998613	0.000196448	0.00138722	0.000186802	0.00119077	0.000159939	-0.0363104	0.0121703	intergenic	NONE(dist=NONE),CRV2G00019544(dist=18438)	CRV2G00019544	Protein of unknown function	0
unitig_41:266212	0.04067	0.009312	0.000164767	0.998602	0.00139758	0.000189624	0.00123282	0.000172274	0.0299878	0.00762777	intergenic	CRV2G00016399(dist=10008),CRV2G00016400(dist=16582)	CRV2G00016399	Protein of unknown function	0
unitig_296:1291	-0.02642	0.006353	0.998593	0.000122489	0.0014067	0.000192455	0.00128421	0.000182471	-0.021726	0.00750403	exonic	CRV2G00022260	CRV2G00022260	Similar to fluG Protein fluG (Emericella nidulans (strain FGSC A4 / ATCC 38163 / CBS 112.46 / NRRL 194 / M139))	GO:0008152;GO:0006807;GO:0004356;GO:0003824
unitig_693:31225	0.05533	0.01184	0.000196261	0.998573	0.00142671	0.000195318	0.00123045	0.000169802	0.0343102	0.0103157	exonic	CRV2G00019705	CRV2G00019705	Similar to yhdF Uncharacterized oxidoreductase YhdF (Bacillus subtilis (strain 168))	GO:0008152;GO:0016491
unitig_187:4577	0.03631	0.008477	0.000157268	0.998573	0.00142688	0.000198169	0.00126961	0.00017482	0.0284887	0.00783297	intergenic	CRV2G00021680(dist=1145),CRV2G00021681(dist=5785)	CRV2G00021680	Protein of unknown function	0
unitig_394:10425	0.02275	0.005551	0.000111191	0.998572	0.00142779	0.000201009	0.0013166	0.000190217	0.018147	0.0060733	intergenic	CRV2G00021055(dist=9143),CRV2G00021056(dist=4173)	CRV2G00021055	Protein of unknown function	0
scf_003:2821616	0.02758	0.006621	0.00013034	0.998556	0.00144352	0.000203872	0.00131318	0.000187634	0.0228152	0.00777687	UTR3	CRV2G00007786(CRV2T00007786_1:c.*448T>C)	CRV2G00007786	Protein of unknown function	0
unitig_31:8535	0.03383	0.007979	0.000153313	0.998544	0.00145597	0.00020675	0.00130266	0.000185046	0.0273252	0.0079892	intronic	CRV2G00020286	CRV2G00020286	Similar to SPBC8E4.05c Uncharacterized protein C8E4.05c (Schizosaccharomyces pombe (strain 972 / ATCC 24843))	GO:0003824
unitig_71:6495	-0.05217	0.01135	0.998521	0.000198848	0.00147928	0.000209669	0.00128043	0.000177379	-0.0330768	0.00915855	exonic	CRV2G00021993	CRV2G00021993	Similar to GRC3 Polynucleotide 5'-hydroxyl-kinase GRC3 (Gibberella zeae (strain PH-1 / ATCC MYA-4620 / FGSC 9075 / NRRL 31084))	0
unitig_71:6507	-0.05217	0.01135	0.998521	0.000198848	0.00147928	0.000212574	0.00128043	0.000179927	-0.0330768	0.00915855	exonic	CRV2G00021993	CRV2G00021993	Similar to GRC3 Polynucleotide 5'-hydroxyl-kinase GRC3 (Gibberella zeae (strain PH-1 / ATCC MYA-4620 / FGSC 9075 / NRRL 31084))	0
unitig_1016:14615	-0.045	0.01015	0.998473	0.00019181	0.00152709	0.000215575	0.00133528	0.000192832	-0.031033	0.00780733	intergenic	NONE(dist=NONE),CRV2G00013765(dist=5098)	CRV2G00013765	Similar to ANK2 Ankyrin-2 (Homo sapiens)	GO:0005515
unitig_818:53850	0.062	0.01299	0.000237855	0.998375	0.00162518	0.000218786	0.00138732	0.000195553	0.0374826	0.0133926	intergenic	CRV2G00017597(dist=1330),CRV2G00017598(dist=2098)	CRV2G00017597	Similar to NPHP3 Nephrocystin-3 (Homo sapiens)	GO:0005515
unitig_818:53884	0.062	0.01299	0.000237855	0.998375	0.00162518	0.000221983	0.00138732	0.000198261	0.0374826	0.0133926	intergenic	CRV2G00017597(dist=1364),CRV2G00017598(dist=2064)	CRV2G00017597	Similar to NPHP3 Nephrocystin-3 (Homo sapiens)	GO:0005515
unitig_818:53991	0.062	0.01299	0.000237855	0.998375	0.00162518	0.000225164	0.00138732	0.000200957	0.0374826	0.0133926	intergenic	CRV2G00017597(dist=1471),CRV2G00017598(dist=1957)	CRV2G00017597	Similar to NPHP3 Nephrocystin-3 (Homo sapiens)	GO:0005515
unitig_818:54043	0.062	0.01299	0.000237855	0.998375	0.00162518	0.000228332	0.00138732	0.000203642	0.0374826	0.0133926	intergenic	CRV2G00017597(dist=1523),CRV2G00017598(dist=1905)	CRV2G00017597	Similar to NPHP3 Nephrocystin-3 (Homo sapiens)	GO:0005515
unitig_629:239207	0.03059	0.00734	0.000161756	0.998367	0.00163252	0.000231502	0.00147077	0.000212027	0.0251956	0.00812305	intergenic	CRV2G00017230(dist=1967),CRV2G00017231(dist=2723)	CRV2G00017230	Protein of unknown function	0
unitig_228:154819	0.04133	0.009521	0.000197281	0.998367	0.00163306	0.000234658	0.00143578	0.000206423	0.029999	0.00775223	upstream	CRV2G00018572(dist=691)	CRV2G00018572	Similar to isp4 Sexual differentiation process protein isp4 (Schizosaccharomyces pombe (strain 972 / ATCC 24843))	GO:0055085
unitig_228:154838	0.04133	0.009521	0.000197281	0.998367	0.00163306	0.000237801	0.00143578	0.000209192	0.029999	0.00775223	upstream	CRV2G00018572(dist=672)	CRV2G00018572	Similar to isp4 Sexual differentiation process protein isp4 (Schizosaccharomyces pombe (strain 972 / ATCC 24843))	GO:0055085
unitig_152:1469	-0.02858	0.006921	0.998276	0.000163249	0.00172434	0.000241134	0.00156109	0.000220895	-0.0235472	0.00800456	intergenic	NONE(dist=NONE),CRV2G00019467(dist=12238)	CRV2G00019467	Similar to NMRAL1 NmrA-like family domain-containing protein 1 (Gallus gallus)	0
scf_014:997378	-0.04583	0.01038	0.998243	0.000225743	0.00175683	0.000244525	0.00153109	0.000217897	-0.031082	0.00800045	intergenic	CRV2G00012293(dist=29375),CRV2G00012294(dist=1115)	CRV2G00012293	Protein of unknown function	GO:0005975;GO:0003824
unitig_821:2188763	0.05606	0.0121	0.000249196	0.998234	0.00176629	0.000247921	0.00151709	0.000214953	0.0343107	0.0106931	intergenic	CRV2G00008612(dist=7002),CRV2G00008613(dist=5469)	CRV2G00008612	Similar to TP53I3 Quinone oxidoreductase PIG3 (Homo sapiens)	GO:0055114;GO:0016747;GO:0008270;GO:0016491
unitig_1018:560127	-0.03325	0.007956	0.998218	0.000189354	0.00178189	0.000251338	0.00159254	0.00022395	-0.0267838	0.00814689	intergenic	CRV2G00015919(dist=25823),NONE(dist=NONE)	CRV2G00015919	Similar to ANK1 Ankyrin-1 (Homo sapiens)	GO:0005515
unitig_196:65041	0.041	0.009526	0.000223718	0.998162	0.00183844	0.000254865	0.00161472	0.000230092	0.0297669	0.00785848	intergenic	CRV2G00019387(dist=2024),CRV2G00019388(dist=2099)	CRV2G00019387	Protein of unknown function	GO:0003676;GO:0003677
unitig_821:1882011	-0.0284	0.006911	0.998157	0.000174971	0.0018432	0.000258387	0.00166822	0.000233274	-0.0233274	0.00800949	intergenic	CRV2G00008512(dist=15146),CRV2G00008513(dist=11103)	CRV2G00008512	Similar to CHS8 Chitin synthase 8 (Ustilago maydis (strain 521 / FGSC 9021))	GO:0016758
unitig_821:1882025	-0.0284	0.006911	0.998157	0.000174971	0.0018432	0.000261893	0.00166822	0.000236442	-0.0233274	0.00800949	intergenic	CRV2G00008512(dist=15160),CRV2G00008513(dist=11089)	CRV2G00008512	Similar to CHS8 Chitin synthase 8 (Ustilago maydis (strain 521 / FGSC 9021))	GO:0016758
scf_003:433737	0.05564	0.01207	0.000263899	0.998133	0.00186705	0.000265436	0.00160315	0.000227015	0.0340524	0.0105404	intergenic	CRV2G00007051(dist=37972),CRV2G00007052(dist=26543)	CRV2G00007051	Protein of unknown function	0
unitig_625:14562	0.03512	0.008384	0.000212334	0.998089	0.00191067	0.00026906	0.00169834	0.000242849	0.0276359	0.00811349	UTR3	CRV2G00017676(CRV2T00017676_1:c.*199C>T)	CRV2G00017676	Similar to BQ2027_MB1310 Uncharacterized GMC-type oxidoreductase Mb1310 (Mycobacterium bovis (strain ATCC BAA-935 / AF2122/97))	GO:0055114;GO:0050660;GO:0006066;GO:0016614;GO:0008812
unitig_611:5633	-0.04758	0.01075	0.998053	0.000257408	0.00194733	0.000272749	0.00168992	0.000239643	-0.0314065	0.00830306	intergenic	NONE(dist=NONE),NONE(dist=NONE)		#N/A	#N/A
scf_024:101813	-0.04692	0.01064	0.998037	0.000257939	0.00196299	0.000276455	0.00170505	0.000246055	-0.0312262	0.00821983	intergenic	CRV2G00013097(dist=12689),CRV2G00013098(dist=24247)	CRV2G00013097	Similar to RTA1 Protein RTA1 (Saccharomyces cerevisiae (strain ATCC 204508 / S288c))	GO:0006950;GO:0016021
unitig_199:9414	-0.03575	0.008533	0.998019	0.000223548	0.00198068	0.000280184	0.00175713	0.000252562	-0.0278692	0.00810976	intronic	CRV2G00022137	CRV2G00022137	Similar to At5g05130 Putative SWI/SNF-related matrix-associated actin-dependent regulator of chromatin subfamily A member 3-like 1 (Arabidopsis thaliana)	GO:0005515;GO:0003677;GO:0005524;GO:0003676;GO:0004386;GO:0008270;GO:0016818
unitig_793:505604	0.05197	0.01151	0.000274488	0.998011	0.00198943	0.000283916	0.00171494	0.00024927	0.0326343	0.00928443	intergenic	CRV2G00016659(dist=28751),NONE(dist=NONE)	CRV2G00016659	Protein of unknown function	GO:0005515
unitig_821:2185702	0.03853	0.009101	0.000238442	0.997987	0.0020127	0.000287683	0.00177426	0.000255877	0.0288982	0.00799826	intergenic	CRV2G00008612(dist=3941),CRV2G00008613(dist=8530)	CRV2G00008612	Similar to TP53I3 Quinone oxidoreductase PIG3 (Homo sapiens)	GO:0055114;GO:0016747;GO:0008270;GO:0016491
unitig_593:12261	0.03721	0.008842	0.000235112	0.997974	0.00202592	0.000291461	0.00179081	0.000259214	0.0284238	0.00805836	downstream	CRV2G00021416(dist=24)	CRV2G00021416	Protein of unknown function	0
unitig_399:12871	-0.00825	0.002165	0.997948	6.97274e-05	0.00205232	0.000295281	0.00198259	0.000324208	-0.00819678	0.00215655	exonic	CRV2G00020470	CRV2G00020470	Similar to MM_0045 Putative ankyrin repeat protein MM_0045 (Methanosarcina mazei (strain ATCC BAA-159 / DSM 3647 / Goe1 / Go1 / JCM 11833 / OCM 88))	GO:0005515
unitig_182:5276	0.04775	0.01083	0.000281201	0.997893	0.00210736	0.000299203	0.00182616	0.000262613	0.0313526	0.0083974	exonic	CRV2G00021295	CRV2G00021295	Protein of unknown function	0
unitig_601:21435	0.02857	0.007013	0.000204988	0.997884	0.00211589	0.000303127	0.00191091	0.000310488	0.0233353	0.00809323	intergenic	CRV2G00019330(dist=2334),CRV2G00019331(dist=10713)	CRV2G00019330	Protein of unknown function	0
scf_003:2850532	-0.03738	0.008902	0.997877	0.000248281	0.00212293	0.000307049	0.00187465	0.000266102	-0.028428	0.0080891	intronic	CRV2G00007797	CRV2G00007797	Protein of unknown function	0
unitig_821:1881994	-0.03075	0.007505	0.99786	0.000219382	0.00214041	0.000310992	0.00192103	0.000313872	-0.02501	0.00827268	intergenic	CRV2G00008512(dist=15129),CRV2G00008513(dist=11120)	CRV2G00008512	Similar to CHS8 Chitin synthase 8 (Ustilago maydis (strain 521 / FGSC 9021))	GO:0016758
scf_014:989225	-0.04093	0.009604	0.997848	0.000265806	0.00215178	0.000314942	0.00188597	0.000269601	-0.0295531	0.00799995	intergenic	CRV2G00012293(dist=21222),CRV2G00012294(dist=9268)	CRV2G00012293	Protein of unknown function	GO:0005975;GO:0003824
scf_014:989249	-0.04093	0.009604	0.997848	0.000265806	0.00215178	0.000318875	0.00188597	0.000273084	-0.0295531	0.00799995	intergenic	CRV2G00012293(dist=21246),CRV2G00012294(dist=9244)	CRV2G00012293	Protein of unknown function	GO:0005975;GO:0003824
scf_014:989435	-0.04093	0.009604	0.997848	0.000265806	0.00215178	0.000322792	0.00188597	0.000276553	-0.0295531	0.00799995	intergenic	CRV2G00012293(dist=21432),CRV2G00012294(dist=9058)	CRV2G00012293	Protein of unknown function	GO:0005975;GO:0003824
scf_014:989450	-0.04093	0.009604	0.997848	0.000265806	0.00215178	0.000326691	0.00188597	0.000280007	-0.0295531	0.00799995	intergenic	CRV2G00012293(dist=21447),CRV2G00012294(dist=9043)	CRV2G00012293	Protein of unknown function	GO:0005975;GO:0003824
scf_014:989527	-0.04093	0.009604	0.997848	0.000265806	0.00215178	0.000330575	0.00188597	0.000283446	-0.0295531	0.00799995	intergenic	CRV2G00012293(dist=21524),CRV2G00012294(dist=8966)	CRV2G00012293	Protein of unknown function	GO:0005975;GO:0003824
scf_014:989564	-0.04093	0.009604	0.997848	0.000265806	0.00215178	0.000334441	0.00188597	0.00028687	-0.0295531	0.00799995	intergenic	CRV2G00012293(dist=21561),CRV2G00012294(dist=8929)	CRV2G00012293	Protein of unknown function	GO:0005975;GO:0003824
scf_014:989570	-0.04093	0.009604	0.997848	0.000265806	0.00215178	0.000338292	0.00188597	0.000290279	-0.0295531	0.00799995	intergenic	CRV2G00012293(dist=21567),CRV2G00012294(dist=8923)	CRV2G00012293	Protein of unknown function	GO:0005975;GO:0003824
scf_014:989577	-0.04093	0.009604	0.997848	0.000265806	0.00215178	0.000342126	0.00188597	0.000293675	-0.0295531	0.00799995	intergenic	CRV2G00012293(dist=21574),CRV2G00012294(dist=8916)	CRV2G00012293	Protein of unknown function	GO:0005975;GO:0003824
scf_014:989586	-0.04093	0.009604	0.997848	0.000265806	0.00215178	0.000345943	0.00188597	0.000297055	-0.0295531	0.00799995	intergenic	CRV2G00012293(dist=21583),CRV2G00012294(dist=8907)	CRV2G00012293	Protein of unknown function	GO:0005975;GO:0003824
scf_014:989704	-0.04093	0.009604	0.997848	0.000265806	0.00215178	0.000349745	0.00188597	0.000300422	-0.0295531	0.00799995	intergenic	CRV2G00012293(dist=21701),CRV2G00012294(dist=8789)	CRV2G00012293	Protein of unknown function	GO:0005975;GO:0003824
scf_014:989730	-0.04093	0.009604	0.997848	0.000265806	0.00215178	0.000353531	0.00188597	0.000303774	-0.0295531	0.00799995	intergenic	CRV2G00012293(dist=21727),CRV2G00012294(dist=8763)	CRV2G00012293	Protein of unknown function	GO:0005975;GO:0003824
scf_014:989764	-0.04093	0.009604	0.997848	0.000265806	0.00215178	0.000357301	0.00188597	0.000307112	-0.0295531	0.00799995	intergenic	CRV2G00012293(dist=21761),CRV2G00012294(dist=8729)	CRV2G00012293	Protein of unknown function	GO:0005975;GO:0003824
unitig_793:499717	0.03889	0.009229	0.000267963	0.997774	0.002226	0.00036121	0.00195804	0.000320739	0.0288896	0.0080725	intergenic	CRV2G00016659(dist=22864),NONE(dist=NONE)	CRV2G00016659	Protein of unknown function	GO:0005515
scf_002:15329	0.05233	0.01166	0.00031824	0.99773	0.00227043	0.000365196	0.00195219	0.000317306	0.0325695	0.00948027	upstream	CRV2G00005851(dist=863)	CRV2G00005851	Similar to argx Probable argininosuccinate lyase (Schizosaccharomyces pombe (strain 972 / ATCC 24843))	GO:0042450;GO:0003824;GO:0004056
unitig_601:20480	0.02619	0.006514	0.000211072	0.997696	0.00230431	0.000369236	0.00209324	0.000331542	0.0211077	0.00761537	intergenic	CRV2G00019330(dist=1379),CRV2G00019331(dist=11668)	CRV2G00019330	Protein of unknown function	0
unitig_8:12547	0.0305	0.00749	0.000238713	0.997678	0.00232156	0.000373295	0.00208284	0.000327872	0.0247392	0.00830698	upstream	CRV2G00021467(dist=918)	CRV2G00021467	Similar to ZEB1 FAD-linked oxidoreductase ZEB1 (Gibberella zeae (strain PH-1 / ATCC MYA-4620 / FGSC 9075 / NRRL 31084))	GO:0055114;GO:0050660;GO:0016614;GO:0003824
unitig_129:9047	0.0165	0.00433	0.000156017	0.997626	0.00237407	0.000377446	0.00221806	0.000342869	0.0136316	0.00380073	exonic	CRV2G00021710	CRV2G00021710	Similar to ARB_02369 Probable secreted lipase ARB_02369 (Arthroderma benhamiae (strain ATCC MYA-4681 / CBS 112371))	0
unitig_743:125892	0.03296	0.008042	0.000259245	0.997622	0.00237848	0.000381589	0.00211923	0.000335251	0.0262719	0.00834435	exonic	CRV2G00019117	CRV2G00019117	Similar to RF_0381 Putative ankyrin repeat protein RF_0381 (Rickettsia felis (strain ATCC VR-1525 / URRWXCal2))	GO:0009116;GO:0005515;GO:0003824
unitig_818:61541	-0.03975	0.009451	0.99756	0.000300318	0.00243973	0.000385841	0.00213941	0.000338986	-0.0290419	0.00813143	exonic	CRV2G00017600	CRV2G00017600	Protein of unknown function	0
unitig_821:2368015	0.0273	0.006797	0.000234529	0.997538	0.00246153	0.000390121	0.002227	0.000346753	0.0220744	0.0079305	intergenic	CRV2G00008665(dist=10053),CRV2G00008666(dist=4397)	CRV2G00008665	Protein of unknown function	0
unitig_601:26071	0.02845	0.007067	0.000246842	0.997494	0.00250594	0.000394474	0.0022591	0.000354579	0.0230587	0.00815147	intergenic	CRV2G00019330(dist=6970),CRV2G00019331(dist=6077)	CRV2G00019330	Protein of unknown function	0
unitig_601:26290	0.02845	0.007067	0.000246842	0.997494	0.00250594	0.00039881	0.0022591	0.000358482	0.0230587	0.00815147	intergenic	CRV2G00019330(dist=7189),CRV2G00019331(dist=5858)	CRV2G00019330	Protein of unknown function	0
unitig_601:26401	0.02845	0.007067	0.000246842	0.997494	0.00250594	0.000403128	0.0022591	0.000362368	0.0230587	0.00815147	intergenic	CRV2G00019330(dist=7300),CRV2G00019331(dist=5747)	CRV2G00019330	Protein of unknown function	0
unitig_601:24511	0.02729	0.006811	0.000243638	0.997453	0.00254733	0.000407513	0.00230369	0.000374075	0.0220325	0.00794205	intergenic	CRV2G00019330(dist=5410),CRV2G00019331(dist=7637)	CRV2G00019330	Protein of unknown function	0
unitig_333:186858	0.03508	0.008533	0.000293063	0.997443	0.00255742	0.0004119	0.00226435	0.00036625	0.0272471	0.00833308	intergenic	CRV2G00018666(dist=7794),CRV2G00018668(dist=24858)	CRV2G00018666	Protein of unknown function	GO:0003676;GO:0046872
unitig_785:43056	-0.039	0.009332	0.997442	0.000313038	0.00255837	0.000416272	0.00224533	0.00035066	-0.0287425	0.00819205	intergenic	CRV2G00019355(dist=6151),CRV2G00019356(dist=12544)	CRV2G00019355	Protein of unknown function	0
unitig_152:20803	-0.06142	0.01327	0.997311	0.000410349	0.0026893	0.000420892	0.00227896	0.000370145	-0.0360743	0.0130959	intergenic	CRV2G00019469(dist=1086),CRV2G00019470(dist=3860)	CRV2G00019469	Similar to ydcJ Uncharacterized protein YdcJ (Escherichia coli (strain K12))	0
unitig_821:2366200	0.02839	0.007089	0.000267269	0.997306	0.00269428	0.000425503	0.00242701	0.000382376	0.0229313	0.00817469	intergenic	CRV2G00008665(dist=8238),CRV2G00008666(dist=6212)	CRV2G00008665	Protein of unknown function	0
unitig_138:10956	0.0355	0.00866	0.000318889	0.99726	0.00274044	0.000430189	0.00242155	0.000378228	0.0273405	0.00837132	UTR3	CRV2G00021160(CRV2T00021160_1:c.*268C>T)	CRV2G00021160	Similar to hus1 Checkpoint protein hus1 (Schizosaccharomyces pombe (strain 972 / ATCC 24843))	GO:0030896;GO:0005730;GO:0000077;GO:0006281
unitig_697:157499	0.03142	0.007783	0.000295473	0.997243	0.00275726	0.000434891	0.00246179	0.000386577	0.0251563	0.00843585	intergenic	CRV2G00018410(dist=5214),CRV2G00018412(dist=13622)	CRV2G00018410	Protein of unknown function	0
unitig_821:2368251	0.02898	0.007238	0.000280539	0.997225	0.00277511	0.000439609	0.00249457	0.000390827	0.0233822	0.00827097	intergenic	CRV2G00008665(dist=10289),CRV2G00008666(dist=4161)	CRV2G00008665	Protein of unknown function	0
unitig_723:91247	-0.0277	0.006956	0.997169	0.0002774	0.00283146	0.000444421	0.00255406	0.000399433	-0.0222897	0.00807303	upstream;downstream	CRV2G00016688(dist=963);CRV2G00016689,CRV2G00016690(dist=930)	CRV2G00016688	Protein of unknown function	0
unitig_333:186747	0.03	0.007485	0.000298028	0.997137	0.00286312	0.000449278	0.00256509	0.000408095	0.0241291	0.00838812	intergenic	CRV2G00018666(dist=7683),CRV2G00018668(dist=24969)	CRV2G00018666	Protein of unknown function	GO:0003676;GO:0046872
unitig_333:186778	0.03	0.007485	0.000298028	0.997137	0.00286312	0.000454116	0.00256509	0.0004124	0.0241291	0.00838812	intergenic	CRV2G00018666(dist=7714),CRV2G00018668(dist=24938)	CRV2G00018666	Protein of unknown function	GO:0003676;GO:0046872
unitig_643:77321	0.04012	0.009623	0.000362116	0.997124	0.00287579	0.000458959	0.00251368	0.000395098	0.0289309	0.00827672	intergenic	CRV2G00019327(dist=18373),NONE(dist=NONE)	CRV2G00019327	Similar to betA Oxygen-dependent choline dehydrogenase (Burkholderia multivorans (strain ATCC 17616 / 249))	GO:0055114;GO:0050660;GO:0006066;GO:0016614;GO:0008812
unitig_821:2367940	0.03337	0.008236	0.000324616	0.997111	0.00288908	0.000463809	0.00256446	0.000403772	0.0262427	0.00846927	intergenic	CRV2G00008665(dist=9978),CRV2G00008666(dist=4472)	CRV2G00008665	Protein of unknown function	0
unitig_105:149298	0.03384	0.008347	0.000333948	0.997061	0.00293852	0.000468739	0.00260457	0.000429696	0.0264645	0.0084727	intergenic	CRV2G00018084(dist=8613),CRV2G00018085(dist=7959)	CRV2G00018084	Protein of unknown function	GO:0004601
unitig_585:102704	0.03744	0.009104	0.000357916	0.997049	0.00295116	0.000473674	0.00259324	0.000416744	0.0280104	0.00836496	intergenic	CRV2G00018139(dist=4343),CRV2G00018140(dist=27532)	CRV2G00018139	Protein of unknown function	0
unitig_585:112659	0.03744	0.009104	0.000357916	0.997049	0.00295116	0.00047859	0.00259324	0.000421071	0.0280104	0.00836496	intergenic	CRV2G00018139(dist=14298),CRV2G00018140(dist=17577)	CRV2G00018139	Protein of unknown function	0
unitig_585:127718	0.03744	0.009104	0.000357916	0.997049	0.00295116	0.000483486	0.00259324	0.000425381	0.0280104	0.00836496	intergenic	CRV2G00018139(dist=29357),CRV2G00018140(dist=2518)	CRV2G00018139	Protein of unknown function	0
unitig_242:8546	0.03912	0.009452	0.000374009	0.997	0.00299957	0.000488459	0.00262556	0.000434036	0.0285617	0.0083334	upstream	CRV2G00019058(dist=688)	CRV2G00019058	Protein of unknown function	GO:0046872
unitig_257:13005	0.03704	0.009038	0.000366195	0.99697	0.00303037	0.000493472	0.00266418	0.000438435	0.0278245	0.00840066	upstream	CRV2G00019823(dist=480)	CRV2G00019823	Similar to TOXG Alanine racemase TOXG (Cochliobolus carbonum)	GO:0006520;GO:0003824;GO:0016829;GO:0030170
unitig_334:5731	-0.0335	0.008292	0.996964	0.000344023	0.00303644	0.000498478	0.00269242	0.000442872	-0.026244	0.00850217	exonic	CRV2G00022029	CRV2G00022029	Protein of unknown function	0
scf_003:2835074	0.02755	0.006967	0.000306062	0.996898	0.00310186	0.000503593	0.00279579	0.000447494	0.0220649	0.00808034	exonic	CRV2G00007790	CRV2G00007790	Protein of unknown function	0
scf_001:12280	0.03223	0.008043	0.000354975	0.996802	0.00319797	0.000508876	0.00284299	0.000470685	0.0254644	0.00854138	intergenic	NONE(dist=NONE),CRV2G00003338(dist=8464)	CRV2G00003338	Protein of unknown function	0
unitig_464:3211	0.03758	0.009186	0.000395707	0.996776	0.00322385	0.000514189	0.00282814	0.000456769	0.0279352	0.008438	upstream;downstream	CRV2G00021613(dist=708);CRV2G00021614(dist=595)	CRV2G00021613	Protein of unknown function	0
scf_003:396865	0.04169	0.01	0.000420015	0.996774	0.00322615	0.000519486	0.00280614	0.000452119	0.0292179	0.00838401	intergenic	CRV2G00007051(dist=1100),CRV2G00007052(dist=63415)	CRV2G00007051	Protein of unknown function	0
unitig_821:2370528	0.02882	0.007279	0.000330866	0.996773	0.00322705	0.000524764	0.00289618	0.000475395	0.0230821	0.00832157	intergenic	CRV2G00008665(dist=12566),CRV2G00008666(dist=1884)	CRV2G00008665	Protein of unknown function	0
unitig_785:52617	-0.05645	0.01263	0.996655	0.000503132	0.00334487	0.00053025	0.00284174	0.000466061	-0.0334076	0.0111024	intergenic	CRV2G00019355(dist=15712),CRV2G00019356(dist=2983)	CRV2G00019355	Protein of unknown function	0
unitig_624:18351	0.06125	0.01342	0.000523409	0.996638	0.00336208	0.000535749	0.00283868	0.000461421	0.035484	0.0130312	intergenic	NONE(dist=NONE),CRV2G00019544(dist=26396)	CRV2G00019544	Protein of unknown function	0
unitig_676:670	0.0185	0.004933	0.000260908	0.996529	0.00347064	0.000541437	0.00320974	0.00052028	0.0146299	0.00450254	upstream	CRV2G00021965(dist=165)	CRV2G00021965	Protein of unknown function	0
scf_003:2835096	0.02495	0.006424	0.000324649	0.996511	0.00348923	0.000547139	0.00316459	0.000509996	0.0196067	0.00733784	exonic	CRV2G00007790	CRV2G00007790	Protein of unknown function	0
scf_024:1038354	-0.04983	0.01154	0.996509	0.000499868	0.00349102	0.000552822	0.00299116	0.000485071	-0.0312026	0.00921738	intergenic	CRV2G00013428(dist=9846),CRV2G00013429(dist=6375)	CRV2G00013428	Similar to Ache Acetylcholinesterase (Mus musculus)	0
unitig_595:40201	0.06275	0.0137	0.000555525	0.996482	0.00351759	0.000558534	0.00296207	0.000480214	0.0361153	0.0136547	upstream	CRV2G00019129(dist=270)	CRV2G00019129	Protein of unknown function	GO:0003677
unitig_821:2369106	0.02506	0.006455	0.000329893	0.996471	0.00352896	0.000564247	0.00319907	0.000515138	0.0196979	0.00738447	intergenic	CRV2G00008665(dist=11144),CRV2G00008666(dist=3306)	CRV2G00008665	Protein of unknown function	0
unitig_629:398517	-0.01775	0.004763	0.996471	0.000258179	0.00352923	0.000569938	0.00327106	0.000530683	-0.014192	0.00426143	intergenic	CRV2G00017284(dist=18242),NONE(dist=NONE)	CRV2G00017284	Protein of unknown function	GO:0006810;GO:0005215;GO:0016020
scf_001:3858823	0.04925	0.01145	0.000505914	0.996454	0.00354607	0.000575639	0.00304016	0.000490004	0.0310224	0.00912332	intergenic	CRV2G00004612(dist=19154),CRV2G00004613(dist=4637)	CRV2G00004612	Protein of unknown function	GO:0055085;GO:0016021
scf_001:3858830	0.04925	0.01145	0.000505914	0.996454	0.00354607	0.000581319	0.00304016	0.000494917	0.0310224	0.00912332	intergenic	CRV2G00004612(dist=19161),CRV2G00004613(dist=4630)	CRV2G00004612	Protein of unknown function	GO:0055085;GO:0016021
unitig_821:240007	0.04825	0.01128	0.000506197	0.996422	0.00357791	0.000587037	0.00307171	0.000499873	0.0307468	0.00896731	intergenic	CRV2G00007970(dist=26037),CRV2G00007971(dist=30465)	CRV2G00007970	Protein of unknown function	GO:0016758;GO:0005975;GO:0016020
unitig_601:20677	0.0281	0.007172	0.000368284	0.996391	0.00360933	0.000592794	0.00324104	0.000525463	0.0223674	0.00825635	intergenic	CRV2G00019330(dist=1576),CRV2G00019331(dist=11471)	CRV2G00019330	Protein of unknown function	0
unitig_821:264632	0.04965	0.01154	0.00052307	0.996357	0.00364283	0.000598593	0.00311976	0.000504901	0.0310877	0.00922262	intergenic	CRV2G00007970(dist=50662),CRV2G00007971(dist=5840)	CRV2G00007970	Protein of unknown function	GO:0016758;GO:0005975;GO:0016020
unitig_114:733683	0.027	0.006928	0.000366324	0.996312	0.00368768	0.000604454	0.00332135	0.000535978	0.0214052	0.00802297	intergenic	CRV2G00014625(dist=7735),NONE(dist=NONE)	CRV2G00014625	Protein of unknown function	0
unitig_192:8416	0.0195	0.005196	0.000294811	0.99626	0.00374022	0.000610393	0.0034454	0.000557643	0.0152103	0.0049049	upstream	CRV2G00022109,CRV2G00022110(dist=778)	CRV2G00022109	Protein of unknown function	0
unitig_821:2368042	0.02866	0.00733	0.000396728	0.996193	0.00380658	0.000616435	0.00340985	0.00054678	0.0227601	0.00837661	intergenic	CRV2G00008665(dist=10080),CRV2G00008666(dist=4370)	CRV2G00008665	Protein of unknown function	0
unitig_643:71494	0.03354	0.008441	0.000451067	0.996132	0.00386752	0.000622569	0.00341645	0.000552194	0.0259217	0.00867538	intergenic	CRV2G00019327(dist=12546),NONE(dist=NONE)	CRV2G00019327	Similar to betA Oxygen-dependent choline dehydrogenase (Burkholderia multivorans (strain ATCC 17616 / 249))	GO:0055114;GO:0050660;GO:0006066;GO:0016614;GO:0008812
unitig_295:1332	0.04044	0.009879	0.000507599	0.996116	0.00388401	0.000628711	0.00337641	0.000541358	0.0285845	0.0085646	intergenic	NONE(dist=NONE),NONE(dist=NONE)		#N/A	#N/A
scf_014:1001099	-0.03415	0.008588	0.996042	0.000468383	0.0039578	0.000634969	0.00348941	0.000568577	-0.0261934	0.00868834	intergenic	CRV2G00012294(dist=2216),CRV2G00012295(dist=11551)	CRV2G00012294	Protein of unknown function	0
unitig_41:280638	-0.0355	0.008888	0.995981	0.000488431	0.0040188	0.000641318	0.00353037	0.000574123	-0.0267878	0.00867982	intergenic	CRV2G00016399(dist=24434),CRV2G00016400(dist=2156)	CRV2G00016399	Protein of unknown function	0
unitig_41:280646	-0.0355	0.008888	0.995981	0.000488431	0.0040188	0.000647642	0.00353037	0.000579649	-0.0267878	0.00867982	intergenic	CRV2G00016399(dist=24442),CRV2G00016400(dist=2148)	CRV2G00016399	Protein of unknown function	0
unitig_114:261345	0.05622	0.01275	0.000624789	0.995922	0.00407846	0.000654055	0.00345367	0.000563087	0.0329489	0.0111209	upstream	CRV2G00014448(dist=476)	CRV2G00014448	Protein of unknown function	0
unitig_380:8336	0.0458	0.01095	0.000586267	0.995824	0.00417649	0.000660627	0.00359022	0.000585266	0.0298875	0.00883925	intergenic	NONE(dist=NONE),CRV2G00019856(dist=8560)	CRV2G00019856	Protein of unknown function	0
unitig_821:2368025	0.0291	0.007491	0.00045264	0.995763	0.00423739	0.000667288	0.00378475	0.000591224	0.02297	0.00849376	intergenic	CRV2G00008665(dist=10063),CRV2G00008666(dist=4387)	CRV2G00008665	Protein of unknown function	0
unitig_624:69130	0.02542	0.006644	0.00042222	0.995652	0.00434847	0.00067413	0.00392625	0.000603474	0.0198408	0.00759805	intergenic	CRV2G00019545(dist=17025),NONE(dist=NONE)	CRV2G00019545	Protein of unknown function	GO:0005515
unitig_19:10636	0.03225	0.008227	0.000502652	0.995639	0.00436137	0.000680971	0.00385871	0.000597297	0.0250382	0.00874613	intergenic	CRV2G00021946(dist=9750),CRV2G00021947(dist=1753)	CRV2G00021946	Protein of unknown function	0
unitig_244:3471	0.0185	0.005033	0.000347107	0.995542	0.00445832	0.000687966	0.00411121	0.000659884	0.0145253	0.00459003	UTR5	CRV2G00021727(CRV2T00021727_1:c.-23G>A)	CRV2G00021727	Protein of unknown function	0
scf_022:3162986	-0.0425	0.01039	0.995451	0.000621278	0.00454937	0.000695103	0.00392809	0.00060963	-0.0289078	0.00875104	intergenic	CRV2G00005747(dist=3552),CRV2G00005748(dist=6918)	CRV2G00005747	Similar to MUP1 High-affinity methionine permease (Saccharomyces cerevisiae (strain ATCC 204508 / S288c))	GO:0016020;GO:0015171;GO:0003333
unitig_41:225301	-0.03417	0.008686	0.995395	0.000555139	0.00460499	0.000702317	0.00404985	0.00063479	-0.0259709	0.00880459	intergenic	CRV2G00016392(dist=18809),CRV2G00016393(dist=17098)	CRV2G00016392	Similar to ARB_01230 Kelch repeat-containing protein ARB_01230 (Arthroderma benhamiae (strain ATCC MYA-4681 / CBS 112371))	GO:0005515
unitig_41:225330	-0.03417	0.008686	0.995395	0.000555139	0.00460499	0.000709504	0.00404985	0.000641056	-0.0259709	0.00880459	intergenic	CRV2G00016392(dist=18838),CRV2G00016393(dist=17069)	CRV2G00016392	Similar to ARB_01230 Kelch repeat-containing protein ARB_01230 (Arthroderma benhamiae (strain ATCC MYA-4681 / CBS 112371))	GO:0005515
unitig_41:277175	-0.03417	0.008686	0.995395	0.000555139	0.00460499	0.000716665	0.00404985	0.000647299	-0.0259709	0.00880459	intergenic	CRV2G00016399(dist=20971),CRV2G00016400(dist=5619)	CRV2G00016399	Protein of unknown function	0
unitig_723:503043	-0.03433	0.008726	0.995358	0.000561787	0.00464169	0.000723867	0.0040799	0.000653574	-0.0260349	0.00881026	upstream	CRV2G00016833(dist=110)	CRV2G00016833	Protein of unknown function	0
unitig_624:27704	-0.05389	0.01248	0.995256	0.00072537	0.00474366	0.000731229	0.00401829	0.000615931	-0.0318709	0.0104767	intergenic	NONE(dist=NONE),CRV2G00019544(dist=17043)	CRV2G00019544	Protein of unknown function	0
scf_014:984850	-0.03025	0.007823	0.995248	0.00052949	0.00475168	0.000738579	0.00422219	0.000666373	-0.0236495	0.00868614	intergenic	CRV2G00012293(dist=16847),CRV2G00012294(dist=13643)	CRV2G00012293	Protein of unknown function	GO:0005975;GO:0003824
unitig_1:432606	0.05758	0.01311	0.000751617	0.99522	0.00478015	0.000745954	0.00402853	0.000622227	0.0331329	0.0116856	intergenic	CRV2G00013600(dist=3324),CRV2G00013601(dist=37279)	CRV2G00013600	Similar to paxP Cytochrome P450 monooxygenase paxP (Penicillium paxilli)	GO:0016705;GO:0055114;GO:0020037;GO:0004497;GO:0005506
unitig_1:432638	0.05758	0.01311	0.000751617	0.99522	0.00478015	0.000753303	0.00402853	0.0006285	0.0331329	0.0116856	intergenic	CRV2G00013600(dist=3356),CRV2G00013601(dist=37247)	CRV2G00013600	Similar to paxP Cytochrome P450 monooxygenase paxP (Penicillium paxilli)	GO:0016705;GO:0055114;GO:0020037;GO:0004497;GO:0005506
scf_022:2302536	0.03119	0.008043	0.000545288	0.995214	0.0047856	0.000760634	0.00424031	0.000672871	0.0242594	0.0087612	intergenic	CRV2G00005444(dist=13454),CRV2G00005445(dist=41017)	CRV2G00005444	Protein of unknown function	0
unitig_723:92	-0.0155	0.00433	0.995169	0.000334367	0.00483088	0.000768021	0.00449651	0.00071969	-0.0128691	0.00376955	intergenic	NONE(dist=NONE),CRV2G00016660(dist=1395)	CRV2G00016660	Protein of unknown function	0
unitig_601:19893	0.02732	0.007151	0.00050427	0.995144	0.00485556	0.000775426	0.00435129	0.000692708	0.0213783	0.00822029	upstream	CRV2G00019330(dist=792)	CRV2G00019330	Protein of unknown function	0
unitig_643:95979	0.04064	0.01009	0.000671505	0.995018	0.00498208	0.000783033	0.00431058	0.000679473	0.0282407	0.00881809	intergenic	CRV2G00019327(dist=37031),NONE(dist=NONE)	CRV2G00019327	Similar to betA Oxygen-dependent choline dehydrogenase (Burkholderia multivorans (strain ATCC 17616 / 249))	GO:0055114;GO:0050660;GO:0006066;GO:0016614;GO:0008812
unitig_105:184565	0.03639	0.009221	0.000636109	0.994979	0.00502088	0.000790683	0.00438477	0.000699372	0.0267988	0.0088566	intergenic	CRV2G00018092(dist=3137),CRV2G00018093(dist=3672)	CRV2G00018092	Protein of unknown function	0
unitig_105:143143	0.03625	0.009205	0.000649472	0.994874	0.00512559	0.000798493	0.00447611	0.000712897	0.0267089	0.00887655	intergenic	CRV2G00018084(dist=2458),CRV2G00018085(dist=14114)	CRV2G00018084	Protein of unknown function	GO:0004601
unitig_821:1846643	0.0565	0.01299	0.000807077	0.994866	0.0051339	0.000806291	0.00432683	0.00068608	0.0325871	0.0113491	intergenic	CRV2G00008510(dist=14670),CRV2G00008511(dist=16302)	CRV2G00008510	Protein of unknown function	0
unitig_908:4894	-0.046	0.01115	0.99481	0.00074771	0.00519006	0.000814161	0.00444235	0.000706116	-0.0295756	0.00909327	intergenic	NONE(dist=NONE),NONE(dist=NONE)		#N/A	#N/A
unitig_333:186840	0.02618	0.006929	0.000538901	0.994709	0.00529058	0.000822183	0.00475168	0.000754956	0.0203143	0.00793592	intergenic	CRV2G00018666(dist=7776),CRV2G00018668(dist=24876)	CRV2G00018666	Protein of unknown function	GO:0003676;GO:0046872
scf_014:978058	-0.03372	0.008679	0.994681	0.0006471	0.00531917	0.000830228	0.00467207	0.000733735	-0.0255198	0.00891398	intergenic	CRV2G00012293(dist=10055),CRV2G00012294(dist=20435)	CRV2G00012293	Protein of unknown function	GO:0005975;GO:0003824
unitig_625:14570	0.03443	0.008839	0.000659468	0.994654	0.00534571	0.000838291	0.00468625	0.000740793	0.025854	0.00892222	UTR3	CRV2G00017676(CRV2T00017676_1:c.*207A>G)	CRV2G00017676	Similar to BQ2027_MB1310 Uncharacterized GMC-type oxidoreductase Mb1310 (Mycobacterium bovis (strain ATCC BAA-935 / AF2122/97))	GO:0055114;GO:0050660;GO:0006066;GO:0016614;GO:0008812
unitig_448:9649	0.0425	0.01051	0.000746495	0.994635	0.00536495	0.00084636	0.00461845	0.000726677	0.0286295	0.00892885	intergenic	CRV2G00021720(dist=3167),NONE(dist=NONE)	CRV2G00021720	#N/A	#N/A
unitig_629:404394	-0.02325	0.00625	0.994536	0.000513513	0.00546389	0.000854577	0.00495037	0.000806177	-0.0177656	0.00677552	intergenic	CRV2G00017284(dist=24119),NONE(dist=NONE)	CRV2G00017284	Protein of unknown function	GO:0006810;GO:0005215;GO:0016020
unitig_821:2367998	0.03198	0.008307	0.000646208	0.99452	0.00548031	0.000862793	0.0048341	0.000762202	0.0245336	0.00888984	intergenic	CRV2G00008665(dist=10036),CRV2G00008666(dist=4414)	CRV2G00008665	Protein of unknown function	0
unitig_821:2368718	0.02716	0.007185	0.000579638	0.994489	0.0055106	0.000871034	0.00493096	0.000784261	0.0210977	0.00823591	intergenic	CRV2G00008665(dist=10756),CRV2G00008666(dist=3694)	CRV2G00008665	Protein of unknown function	0
unitig_821:2370674	0.02716	0.007185	0.000579638	0.994489	0.0055106	0.000879245	0.00493096	0.000791575	0.0210977	0.00823591	intergenic	CRV2G00008665(dist=12712),CRV2G00008666(dist=1738)	CRV2G00008665	Protein of unknown function	0
unitig_152:35919	0.05353	0.01255	0.000860699	0.99445	0.00555043	0.000887498	0.00468973	0.000747832	0.0314578	0.0105048	upstream	CRV2G00019474(dist=52)	CRV2G00019474	Protein of unknown function	0
unitig_126:11811	-0.041	0.01026	0.994294	0.0007849	0.00570561	0.000895996	0.00492071	0.000769575	-0.0281095	0.00896455	upstream	CRV2G00021344(dist=410)	CRV2G00021344	Similar to FUS6 Efflux pump FUS6 (Gibberella moniliformis (strain M3125 / FGSC 7600))	GO:0055085;GO:0016021
unitig_126:11819	-0.041	0.01026	0.994294	0.0007849	0.00570561	0.000904463	0.00492071	0.000776922	-0.0281095	0.00896455	upstream	CRV2G00021344(dist=402)	CRV2G00021344	Similar to FUS6 Efflux pump FUS6 (Gibberella moniliformis (strain M3125 / FGSC 7600))	GO:0055085;GO:0016021
scf_001:3910370	0.02711	0.007196	0.000605459	0.994267	0.00573275	0.000912949	0.0051273	0.000843472	0.0210096	0.00824042	downstream	CRV2G00004623(dist=205)	CRV2G00004623	Protein of unknown function	0
unitig_821:2370018	0.03138	0.008204	0.000678029	0.994216	0.0057841	0.000921495	0.00510607	0.000821012	0.0240912	0.00889255	intergenic	CRV2G00008665(dist=12056),CRV2G00008666(dist=2394)	CRV2G00008665	Protein of unknown function	0
unitig_196:17027	0.05022	0.01201	0.000884154	0.994174	0.00582554	0.000930083	0.00494138	0.000798881	0.0304336	0.00979752	downstream	CRV2G00019377,CRV2G00019378(dist=857)	CRV2G00019377	Protein of unknown function	0
unitig_114:737096	-0.04712	0.01145	0.994161	0.000861856	0.00583876	0.000938665	0.0049769	0.000813494	-0.029643	0.00933882	intergenic	CRV2G00014625(dist=11148),NONE(dist=NONE)	CRV2G00014625	Protein of unknown function	0
unitig_393:1002	-0.012	0.003464	0.994123	0.000339077	0.00587658	0.000947283	0.00553751	0.00101109	-0.0108635	0.00308975	exonic	CRV2G00020448	CRV2G00020448	Protein of unknown function	0
scf_024:1037373	0.04808	0.01165	0.00089855	0.993987	0.0060126	0.000956107	0.00511405	0.000828517	0.0298273	0.00949028	intergenic	CRV2G00013428(dist=8865),CRV2G00013429(dist=7356)	CRV2G00013428	Similar to Ache Acetylcholinesterase (Mus musculus)	0
scf_024:1037424	0.04808	0.01165	0.00089855	0.993987	0.0060126	0.000964901	0.00511405	0.000835996	0.0298273	0.00949028	intergenic	CRV2G00013428(dist=8916),CRV2G00013429(dist=7305)	CRV2G00013428	Similar to Ache Acetylcholinesterase (Mus musculus)	0
unitig_823:635238	-0.0287	0.007603	0.993979	0.000666768	0.00602075	0.000973679	0.00535398	0.000866366	-0.0222039	0.00860874	intergenic	CRV2G00015724(dist=9941),NONE(dist=NONE)	CRV2G00015724	Similar to FUS6 Efflux pump FUS6 (Gibberella moniliformis (strain M3125 / FGSC 7600))	GO:0055085;GO:0016021
unitig_821:2370109	0.02772	0.007375	0.000656374	0.993931	0.00606885	0.000982509	0.00541248	0.000965617	0.0214344	0.00841595	intergenic	CRV2G00008665(dist=12147),CRV2G00008666(dist=2303)	CRV2G00008665	Protein of unknown function	0
unitig_821:2370118	0.02772	0.007375	0.000656374	0.993931	0.00606885	0.000991309	0.00541248	0.000973141	0.0214344	0.00841595	intergenic	CRV2G00008665(dist=12156),CRV2G00008666(dist=2294)	CRV2G00008665	Protein of unknown function	0
unitig_106:7275	0.04727	0.01151	0.000902317	0.993923	0.00607658	0.00100009	0.00517426	0.000851004	0.0296065	0.00940112	intergenic	CRV2G00021918(dist=4877),NONE(dist=NONE)	CRV2G00021918	Protein of unknown function	0
scf_001:3910240	-0.0341	0.008861	0.993838	0.00076909	0.00616202	0.00100899	0.00539293	0.000950525	-0.0254588	0.0090334	downstream	CRV2G00004623(dist=75)	CRV2G00004623	Protein of unknown function	0
scf_001:3910271	-0.0341	0.008861	0.993838	0.00076909	0.00616202	0.00101786	0.00539293	0.000958067	-0.0254588	0.0090334	downstream	CRV2G00004623(dist=106)	CRV2G00004623	Protein of unknown function	0
unitig_659:30332	0.05512	0.01292	0.000983991	0.993804	0.00619607	0.00102676	0.00521208	0.000858575	0.0317264	0.011043	intergenic	CRV2G00019287(dist=1095),CRV2G00019288(dist=11894)	CRV2G00019287	Similar to hsp30 30 kDa heat shock protein (Emericella nidulans (strain FGSC A4 / ATCC 38163 / CBS 112.46 / NRRL 194 / M139))	0
scf_010:2104477	0.02865	0.00761	0.000689602	0.993791	0.00620872	0.00103565	0.00551912	0.00100348	0.0221241	0.00861551	intergenic	CRV2G00011325(dist=5087),CRV2G00011326(dist=20033)	CRV2G00011325	Protein of unknown function	GO:0000981;GO:0006355;GO:0005634;GO:0008270
unitig_697:11211	0.03969	0.01006	0.000850401	0.993775	0.00622496	0.00104453	0.00537456	0.000942957	0.0275665	0.00904578	intergenic	NONE(dist=NONE),CRV2G00018376(dist=4138)	CRV2G00018376	Protein of unknown function	0
unitig_105:231199	0.03832	0.009784	0.000842918	0.993716	0.00628365	0.00105349	0.00544073	0.000980688	0.0271103	0.00905375	intergenic	CRV2G00018099(dist=16713),CRV2G00018100(dist=14736)	CRV2G00018099	Similar to TIC32 Short-chain dehydrogenase TIC 32, chloroplastic (Arabidopsis thaliana)	GO:0008152;GO:0016491
scf_014:972386	-0.03	0.007937	0.993707	0.000723231	0.0062931	0.00106243	0.00556987	0.00103389	-0.0230709	0.00882033	intergenic	CRV2G00012293(dist=4383),CRV2G00012294(dist=26107)	CRV2G00012293	Protein of unknown function	GO:0005975;GO:0003824
scf_003:414379	0.0405	0.01024	0.000879675	0.993646	0.00635441	0.00107144	0.00547474	0.000988266	0.0277708	0.00907403	intergenic	CRV2G00007051(dist=18614),CRV2G00007052(dist=45901)	CRV2G00007051	Protein of unknown function	0
scf_003:424531	0.05642	0.01317	0.00102739	0.993612	0.00638823	0.00108049	0.00536084	0.000874142	0.0320854	0.0114623	intergenic	CRV2G00007051(dist=28766),CRV2G00007052(dist=35749)	CRV2G00007051	Protein of unknown function	0
scf_003:424624	0.05642	0.01317	0.00102739	0.993612	0.00638823	0.0010895	0.00536084	0.000881891	0.0320854	0.0114623	intergenic	CRV2G00007051(dist=28859),CRV2G00007052(dist=35656)	CRV2G00007051	Protein of unknown function	0
scf_003:426939	0.05642	0.01317	0.00102739	0.993612	0.00638823	0.00109848	0.00536084	0.000889614	0.0320854	0.0114623	intergenic	CRV2G00007051(dist=31174),CRV2G00007052(dist=33341)	CRV2G00007051	Protein of unknown function	0
scf_003:427041	0.05642	0.01317	0.00102739	0.993612	0.00638823	0.00110743	0.00536084	0.000897309	0.0320854	0.0114623	intergenic	CRV2G00007051(dist=31276),CRV2G00007052(dist=33239)	CRV2G00007051	Protein of unknown function	0
scf_003:428177	0.05642	0.01317	0.00102739	0.993612	0.00638823	0.00111635	0.00536084	0.000904979	0.0320854	0.0114623	intergenic	CRV2G00007051(dist=32412),CRV2G00007052(dist=32103)	CRV2G00007051	Protein of unknown function	0
scf_003:428617	0.05642	0.01317	0.00102739	0.993612	0.00638823	0.00112524	0.00536084	0.000912622	0.0320854	0.0114623	intergenic	CRV2G00007051(dist=32852),CRV2G00007052(dist=31663)	CRV2G00007051	Protein of unknown function	0
scf_003:429108	0.05642	0.01317	0.00102739	0.993612	0.00638823	0.0011341	0.00536084	0.000920238	0.0320854	0.0114623	intergenic	CRV2G00007051(dist=33343),CRV2G00007052(dist=31172)	CRV2G00007051	Protein of unknown function	0
scf_003:432973	0.05642	0.01317	0.00102739	0.993612	0.00638823	0.00114293	0.00536084	0.000927829	0.0320854	0.0114623	intergenic	CRV2G00007051(dist=37208),CRV2G00007052(dist=27307)	CRV2G00007051	Protein of unknown function	0
scf_003:433190	0.05642	0.01317	0.00102739	0.993612	0.00638823	0.00115173	0.00536084	0.000935394	0.0320854	0.0114623	intergenic	CRV2G00007051(dist=37425),CRV2G00007052(dist=27090)	CRV2G00007051	Protein of unknown function	0
scf_001:3840691	0.03621	0.00935	0.00083347	0.993595	0.00640495	0.00116053	0.00557148	0.00104145	0.026307	0.00907667	intergenic	CRV2G00004612(dist=1022),CRV2G00004613(dist=22769)	CRV2G00004612	Protein of unknown function	GO:0055085;GO:0016021
unitig_105:86657	0.03328	0.008708	0.000796735	0.993554	0.00644626	0.00116937	0.00564953	0.00105675	0.0249768	0.00905196	UTR5	CRV2G00018066(CRV2T00018066_1:c.-120A>G)	CRV2G00018066	Protein of unknown function	0
unitig_105:232902	0.04446	0.01103	0.000937017	0.993552	0.00644792	0.00117818	0.0055109	0.00099588	0.0288018	0.00922398	intergenic	CRV2G00018099(dist=18416),CRV2G00018100(dist=13033)	CRV2G00018099	Similar to TIC32 Short-chain dehydrogenase TIC 32, chloroplastic (Arabidopsis thaliana)	GO:0008152;GO:0016491
scf_003:457786	0.03493	0.009078	0.000824625	0.993531	0.00646861	0.001187	0.00564398	0.00104911	0.0257545	0.00908169	intergenic	CRV2G00007051(dist=62021),CRV2G00007052(dist=2494)	CRV2G00007051	Protein of unknown function	0
unitig_821:2189873	0.04216	0.01061	0.000949291	0.993323	0.0066771	0.00119613	0.00572781	0.00112514	0.0281423	0.00916164	intergenic	CRV2G00008612(dist=8112),CRV2G00008613(dist=4359)	CRV2G00008612	Similar to TP53I3 Quinone oxidoreductase PIG3 (Homo sapiens)	GO:0055114;GO:0016747;GO:0008270;GO:0016491
unitig_821:2158042	0.03992	0.01016	0.000923352	0.993319	0.00668079	0.00120525	0.00575744	0.00113271	0.0275058	0.00912182	downstream	CRV2G00008602(dist=459)	CRV2G00008602	Protein of unknown function	0
unitig_196:17793	0.06489	0.01463	0.00114421	0.993295	0.00670463	0.00121437	0.00556042	0.00101871	0.0353046	0.0144684	downstream	CRV2G00019378(dist=91)	CRV2G00019378	Protein of unknown function	0
unitig_196:17846	0.06489	0.01463	0.00114421	0.993295	0.00670463	0.00122346	0.00556042	0.0010263	0.0353046	0.0144684	downstream	CRV2G00019378(dist=38)	CRV2G00019378	Protein of unknown function	0
unitig_821:1875554	-0.04735	0.01161	0.993263	0.00101298	0.00673675	0.00123257	0.00572378	0.0011176	-0.0294309	0.00952853	intergenic	CRV2G00008512(dist=8689),CRV2G00008513(dist=17560)	CRV2G00008512	Similar to CHS8 Chitin synthase 8 (Ustilago maydis (strain 521 / FGSC 9021))	GO:0016758
unitig_697:148801	0.05014	0.01212	0.00103966	0.993257	0.00674335	0.00124166	0.00570369	0.00111003	0.0301297	0.00993899	intergenic	CRV2G00018409(dist=30296),CRV2G00018410(dist=2261)	CRV2G00018409	Protein of unknown function	0
scf_022:2341415	0.03204	0.008458	0.000820474	0.993237	0.00676264	0.00125076	0.00594217	0.00117099	0.0242272	0.00903613	intergenic	CRV2G00005444(dist=52333),CRV2G00005445(dist=2138)	CRV2G00005444	Protein of unknown function	0
unitig_585:98672	0.04495	0.01117	0.00100423	0.993171	0.00682872	0.00125993	0.00582449	0.00114799	0.0288151	0.00932281	downstream	CRV2G00018139(dist=311)	CRV2G00018139	Protein of unknown function	0
unitig_200:31404	0.04605	0.01138	0.0010176	0.993159	0.00684105	0.0012691	0.00582345	0.00114036	0.0290824	0.00941277	intronic	CRV2G00019728	CRV2G00019728	Protein of unknown function	0
unitig_105:233948	0.04552	0.01128	0.00101235	0.993158	0.00684202	0.00127823	0.00582968	0.00115561	0.028952	0.00936788	intergenic	CRV2G00018099(dist=19462),CRV2G00018100(dist=11987)	CRV2G00018099	Similar to TIC32 Short-chain dehydrogenase TIC 32, chloroplastic (Arabidopsis thaliana)	GO:0008152;GO:0016491
unitig_601:20740	0.02488	0.006768	0.000702945	0.993105	0.00689533	0.00128743	0.00619238	0.00121085	0.0189331	0.00757935	intergenic	CRV2G00019330(dist=1639),CRV2G00019331(dist=11408)	CRV2G00019330	Protein of unknown function	0
scf_024:1035508	-0.06883	0.0153	0.993102	0.00120731	0.0068977	0.00129659	0.00569039	0.00106444	-0.0370172	0.0158225	intergenic	CRV2G00013428(dist=7000),CRV2G00013429(dist=9221)	CRV2G00013428	Similar to Ache Acetylcholinesterase (Mus musculus)	0
scf_024:1035539	-0.06883	0.0153	0.993102	0.00120731	0.0068977	0.00130573	0.00569039	0.0010721	-0.0370172	0.0158225	intergenic	CRV2G00013428(dist=7031),CRV2G00013429(dist=9190)	CRV2G00013428	Similar to Ache Acetylcholinesterase (Mus musculus)	0
scf_024:1036235	-0.06883	0.0153	0.993102	0.00120731	0.0068977	0.00131484	0.00569039	0.00107973	-0.0370172	0.0158225	intergenic	CRV2G00013428(dist=7727),CRV2G00013429(dist=8494)	CRV2G00013428	Similar to Ache Acetylcholinesterase (Mus musculus)	0
scf_024:1037224	-0.06883	0.0153	0.993102	0.00120731	0.0068977	0.00132392	0.00569039	0.00108734	-0.0370172	0.0158225	intergenic	CRV2G00013428(dist=8716),CRV2G00013429(dist=7505)	CRV2G00013428	Similar to Ache Acetylcholinesterase (Mus musculus)	0
scf_024:1037305	-0.06883	0.0153	0.993102	0.00120731	0.0068977	0.00133296	0.00569039	0.00109492	-0.0370172	0.0158225	intergenic	CRV2G00013428(dist=8797),CRV2G00013429(dist=7424)	CRV2G00013428	Similar to Ache Acetylcholinesterase (Mus musculus)	0
scf_024:1037509	-0.06883	0.0153	0.993102	0.00120731	0.0068977	0.00134198	0.00569039	0.00110248	-0.0370172	0.0158225	intergenic	CRV2G00013428(dist=9001),CRV2G00013429(dist=7220)	CRV2G00013428	Similar to Ache Acetylcholinesterase (Mus musculus)	0
unitig_15:2145	0.02567	0.00696	0.000720278	0.993092	0.00690846	0.00135099	0.00618818	0.00120283	0.0195951	0.00787701	intergenic	NONE(dist=NONE),NONE(dist=NONE)		#N/A	#N/A
unitig_643:94224	0.04886	0.01191	0.00105771	0.993083	0.00691682	0.00135998	0.00585911	0.00116324	0.0297535	0.00975824	intergenic	CRV2G00019327(dist=35276),NONE(dist=NONE)	CRV2G00019327	Similar to betA Oxygen-dependent choline dehydrogenase (Burkholderia multivorans (strain ATCC 17616 / 249))	GO:0055114;GO:0050660;GO:0006066;GO:0016614;GO:0008812
unitig_122:1713	-0.03812	0.009815	0.993063	0.000939126	0.00693667	0.00136898	0.00599754	0.0011788	-0.02686	0.00915255	upstream	CRV2G00022199,CRV2G00022200(dist=990)	CRV2G00022199	Protein of unknown function	0
unitig_655:18578	-0.03538	0.009235	0.992978	0.000911666	0.00702208	0.00137808	0.00611041	0.00118676	-0.0258007	0.00915587	intergenic	NONE(dist=NONE),CRV2G00020162(dist=4954)	CRV2G00020162	Protein of unknown function	0
scf_014:989678	-0.04142	0.01052	0.992816	0.00102115	0.00718389	0.00138741	0.00616274	0.00119479	-0.0278008	0.00922441	intergenic	CRV2G00012293(dist=21675),CRV2G00012294(dist=8815)	CRV2G00012293	Protein of unknown function	GO:0005975;GO:0003824
unitig_473:11248	0.025	0.006822	0.000740746	0.992803	0.00719651	0.00139674	0.00645576	0.0012596	0.0189908	0.00764489	intergenic	CRV2G00021106(dist=3447),NONE(dist=NONE)	CRV2G00021106	Protein of unknown function	0
unitig_821:2183645	0.03906	0.01004	0.00099296	0.992797	0.00720268	0.00140604	0.00620972	0.00121888	0.0270973	0.0091948	intergenic	CRV2G00008612(dist=1884),CRV2G00008613(dist=10587)	CRV2G00008612	Similar to TP53I3 Quinone oxidoreductase PIG3 (Homo sapiens)	GO:0055114;GO:0016747;GO:0008270;GO:0016491
unitig_196:36839	0.03488	0.009145	0.000933062	0.992777	0.00722315	0.00141535	0.00629009	0.00124308	0.0255334	0.0091749	upstream	CRV2G00019382(dist=340)	CRV2G00019382	Similar to FMP42 Protein FMP42 (Saccharomyces cerevisiae (strain ATCC 204508 / S288c))	GO:0005515
unitig_314:7062	0.038	0.009823	0.000985461	0.992748	0.00725161	0.00142467	0.00626615	0.001235	0.0267351	0.00919672	intergenic	NONE(dist=NONE),NONE(dist=NONE)		#N/A	#N/A
unitig_760:7985	0.04893	0.01198	0.00113923	0.992611	0.00738895	0.00143418	0.00624972	0.00122694	0.0296385	0.00984394	UTR5	CRV2G00020684(CRV2T00020684_1:c.-248T>C)	CRV2G00020684	Similar to FRQ Frequency clock protein (Trichoderma spinulosum)	GO:0005737;GO:0006355;GO:0005634;GO:0007623
unitig_511:12115	0.0388	0.01001	0.0010251	0.992566	0.00743377	0.00144374	0.00640867	0.00125132	0.0269532	0.00922597	intergenic	NONE(dist=NONE),NONE(dist=NONE)		#N/A	#N/A
unitig_339:3564	0.04317	0.01091	0.00110597	0.992427	0.00757335	0.00145348	0.00646739	0.00126788	0.0281643	0.00934319	intergenic	NONE(dist=NONE),NONE(dist=NONE)		#N/A	#N/A
unitig_1018:552110	0.03925	0.01012	0.00105615	0.992409	0.00759132	0.00146323	0.00653516	0.00127624	0.0270555	0.0092515	intergenic	CRV2G00015919(dist=17806),NONE(dist=NONE)	CRV2G00015919	Similar to ANK1 Ankyrin-1 (Homo sapiens)	GO:0005515
unitig_673:57630	0.02826	0.007645	0.000860825	0.992392	0.00760803	0.00147296	0.00674721	0.00131016	0.0215471	0.00864316	intergenic	CRV2G00018922(dist=2614),CRV2G00018923(dist=40044)	CRV2G00018922	Protein of unknown function	0
unitig_122:7436	0.0215	0.006007	0.000714637	0.992359	0.00764124	0.00148272	0.0069266	0.00136242	0.0161696	0.00608875	upstream	CRV2G00022201(dist=369)	CRV2G00022201	Protein of unknown function	0
unitig_643:77497	0.02658	0.007245	0.000833712	0.992317	0.00768264	0.00149252	0.00684892	0.00132752	0.0202221	0.008222	intergenic	CRV2G00019327(dist=18549),NONE(dist=NONE)	CRV2G00019327	Similar to betA Oxygen-dependent choline dehydrogenase (Burkholderia multivorans (strain ATCC 17616 / 249))	GO:0055114;GO:0050660;GO:0006066;GO:0016614;GO:0008812
unitig_170:25036	0.037	0.009654	0.00103695	0.99231	0.0076896	0.00150229	0.00665265	0.00130157	0.0262679	0.00924993	downstream	CRV2G00019610(dist=429)	CRV2G00019610	Similar to bcsl1b Probable mitochondrial chaperone BCS1-B (Dictyostelium discoideum)	GO:0034551;GO:0017111;GO:0005524;GO:0000166
unitig_818:331854	0.04342	0.01098	0.00114108	0.992232	0.00776815	0.00151216	0.00662707	0.00129311	0.0281778	0.0093845	upstream	CRV2G00017660(dist=879)	CRV2G00017660	Similar to mug138 Putative zinc protease mug138 (Schizosaccharomyces pombe (strain 972 / ATCC 24843))	GO:0003824;GO:0046872
unitig_31:16361	0.02033	0.005731	0.000701517	0.992228	0.00777244	0.001522	0.00707092	0.00147513	0.0153601	0.00555675	downstream	CRV2G00020291(dist=688)	CRV2G00020291	Protein of unknown function	0
scf_003:423596	0.05393	0.01293	0.00126917	0.992148	0.00785247	0.00153194	0.0065833	0.00128465	0.0308445	0.0109184	intergenic	CRV2G00007051(dist=27831),CRV2G00007052(dist=36684)	CRV2G00007051	Protein of unknown function	0
scf_022:3436002	-0.03633	0.009533	0.992061	0.00106363	0.0079387	0.00154198	0.00687507	0.00133623	-0.0259534	0.00927518	intergenic	CRV2G00005838(dist=12855),CRV2G00005839(dist=24594)	CRV2G00005838	Protein of unknown function	GO:0016772
scf_022:3428219	-0.04275	0.01087	0.992022	0.00116688	0.00797811	0.00155206	0.00681123	0.00131883	-0.027951	0.00938623	intergenic	CRV2G00005838(dist=5072),CRV2G00005839(dist=32377)	CRV2G00005838	Protein of unknown function	GO:0016772
unitig_295:1329	0.03989	0.0103	0.00113991	0.991938	0.0080622	0.00156223	0.00692229	0.00135371	0.0271326	0.00932374	intergenic	NONE(dist=NONE),NONE(dist=NONE)		#N/A	#N/A
unitig_170:10518	0.03574	0.009419	0.00107766	0.9919	0.00810002	0.00157243	0.00702236	0.00138	0.0256806	0.00928716	intergenic	NONE(dist=NONE),CRV2G00019604(dist=2815)	CRV2G00019604	Protein of unknown function	0
unitig_41:283804	0.04155	0.01065	0.00118225	0.991826	0.00817388	0.00158271	0.00699163	0.0013712	0.0275808	0.00937374	upstream	CRV2G00016400(dist=227)	CRV2G00016400	Protein of unknown function	0
unitig_284:6805	0.03043	0.008215	0.000989168	0.991781	0.00821878	0.00159303	0.00722961	0.00152742	0.0229311	0.00902851	upstream	CRV2G00020536(dist=579)	CRV2G00020536	Protein of unknown function	0
scf_025:750403	0.05394	0.01298	0.00134365	0.991736	0.00826438	0.00160339	0.00692074	0.00134498	0.0307307	0.0109688	downstream	CRV2G00012734(dist=157)	CRV2G00012734	Similar to PGC Gastricsin (Callithrix jacchus)	GO:0004190;GO:0006508
unitig_723:19873	0.02975	0.008062	0.00098832	0.991676	0.00832367	0.00161381	0.00733535	0.00153622	0.0224669	0.00894911	exonic	CRV2G00016665	CRV2G00016665	Protein of unknown function	0
unitig_114:261107	0.05207	0.01266	0.00134291	0.991634	0.00836567	0.00162426	0.00702277	0.00138878	0.0301842	0.0105483	upstream	CRV2G00014448(dist=238)	CRV2G00014448	Protein of unknown function	0
unitig_114:261114	0.05207	0.01266	0.00134291	0.991634	0.00836567	0.00163468	0.00702277	0.00139753	0.0301842	0.0105483	upstream	CRV2G00014448(dist=245)	CRV2G00014448	Protein of unknown function	0
unitig_114:261125	0.05207	0.01266	0.00134291	0.991634	0.00836567	0.00164507	0.00702277	0.00140625	0.0301842	0.0105483	upstream	CRV2G00014448(dist=256)	CRV2G00014448	Protein of unknown function	0
unitig_114:261191	0.05207	0.01266	0.00134291	0.991634	0.00836567	0.00165542	0.00702277	0.00141494	0.0301842	0.0105483	upstream	CRV2G00014448(dist=322)	CRV2G00014448	Protein of unknown function	0
unitig_114:261201	0.05207	0.01266	0.00134291	0.991634	0.00836567	0.00166575	0.00702277	0.00142361	0.0301842	0.0105483	upstream	CRV2G00014448(dist=332)	CRV2G00014448	Protein of unknown function	0
unitig_114:261248	0.05207	0.01266	0.00134291	0.991634	0.00836567	0.00167604	0.00702277	0.00143225	0.0301842	0.0105483	upstream	CRV2G00014448(dist=379)	CRV2G00014448	Protein of unknown function	0
unitig_114:261259	0.05207	0.01266	0.00134291	0.991634	0.00836567	0.0016863	0.00702277	0.00144086	0.0301842	0.0105483	upstream	CRV2G00014448(dist=390)	CRV2G00014448	Protein of unknown function	0
unitig_114:261298	0.05207	0.01266	0.00134291	0.991634	0.00836567	0.00169653	0.00702277	0.00144945	0.0301842	0.0105483	upstream	CRV2G00014448(dist=429)	CRV2G00014448	Protein of unknown function	0
unitig_114:261312	0.05207	0.01266	0.00134291	0.991634	0.00836567	0.00170672	0.00702277	0.00145801	0.0301842	0.0105483	upstream	CRV2G00014448(dist=443)	CRV2G00014448	Protein of unknown function	0
unitig_114:261318	0.05207	0.01266	0.00134291	0.991634	0.00836567	0.00171689	0.00702277	0.00146655	0.0301842	0.0105483	upstream	CRV2G00014448(dist=449)	CRV2G00014448	Protein of unknown function	0
unitig_141:13047	-0.018	0.005196	0.99155	0.000710835	0.00845003	0.00172715	0.0077392	0.00166027	-0.0139414	0.00467729	upstream	CRV2G00021748(dist=740)	CRV2G00021748	Protein of unknown function	0
unitig_697:243702	0.02785	0.007615	0.000961517	0.991544	0.0084562	0.0017374	0.00749468	0.00159804	0.0210885	0.008606	exonic	CRV2G00018430	CRV2G00018430	Protein of unknown function	GO:0003676;GO:0004523
scf_003:2818187	0.03538	0.009383	0.00114336	0.99142	0.00858049	0.0017478	0.00743713	0.00156272	0.0254204	0.00933344	exonic	CRV2G00007784	CRV2G00007784	Similar to PSD2 Phosphatidylserine decarboxylase proenzyme 2 (Oryza sativa subsp. japonica)	GO:0004609;GO:0008654
scf_003:2818204	0.03538	0.009383	0.00114336	0.99142	0.00858049	0.00175816	0.00743713	0.00157157	0.0254204	0.00933344	exonic	CRV2G00007784	CRV2G00007784	Similar to PSD2 Phosphatidylserine decarboxylase proenzyme 2 (Oryza sativa subsp. japonica)	GO:0004609;GO:0008654
scf_003:2818211	0.03538	0.009383	0.00114336	0.99142	0.00858049	0.0017685	0.00743713	0.00158039	0.0254204	0.00933344	exonic	CRV2G00007784	CRV2G00007784	Similar to PSD2 Phosphatidylserine decarboxylase proenzyme 2 (Oryza sativa subsp. japonica)	GO:0004609;GO:0008654
scf_003:2818246	0.03538	0.009383	0.00114336	0.99142	0.00858049	0.00177881	0.00743713	0.00158918	0.0254204	0.00933344	exonic	CRV2G00007784	CRV2G00007784	Similar to PSD2 Phosphatidylserine decarboxylase proenzyme 2 (Oryza sativa subsp. japonica)	GO:0004609;GO:0008654
unitig_793:118	-0.05625	0.01342	0.991414	0.00142521	0.00858608	0.00178909	0.00716087	0.00148382	-0.0313326	0.0116267	exonic	CRV2G00016485	CRV2G00016485	Protein of unknown function	0
unitig_170:19308	0.03869	0.0101	0.00120432	0.991411	0.00858897	0.00179935	0.00738465	0.00155385	0.0266309	0.00937585	upstream	CRV2G00019608(dist=185)	CRV2G00019608	Protein of unknown function	0
scf_025:778307	0.03338	0.008935	0.00110751	0.991391	0.00860864	0.0018096	0.00750113	0.00161568	0.0245073	0.00927844	intronic	CRV2G00012743	CRV2G00012743	Similar to codA Choline oxidase (Arthrobacter globiformis)	GO:0055114;GO:0050660;GO:0016614
unitig_643:70948	0.04317	0.01102	0.00128214	0.99136	0.00863986	0.00181987	0.00735772	0.00154503	0.0278961	0.00949842	intergenic	CRV2G00019327(dist=12000),NONE(dist=NONE)	CRV2G00019327	Similar to betA Oxygen-dependent choline dehydrogenase (Burkholderia multivorans (strain ATCC 17616 / 249))	GO:0055114;GO:0050660;GO:0006066;GO:0016614;GO:0008812
unitig_259:5511	-0.02167	0.006119	0.991313	0.000833125	0.00868658	0.00183018	0.00785345	0.00170558	-0.0161998	0.00622926	upstream	CRV2G00021379(dist=930)	CRV2G00021379	Protein of unknown function	0
unitig_170:22169	0.03772	0.009904	0.00120507	0.991299	0.00870052	0.00184048	0.00749546	0.00160686	0.0262802	0.00937811	upstream	CRV2G00019609,CRV2G00019610(dist=906)	CRV2G00019609	Protein of unknown function	GO:0046872
unitig_486:3770	-0.02633	0.007265	0.991271	0.000958746	0.00872863	0.00185079	0.00776988	0.00166932	-0.0198625	0.00820279	intergenic	NONE(dist=NONE),NONE(dist=NONE)		#N/A	#N/A
unitig_818:47069	-0.06125	0.01429	0.991271	0.00149919	0.00872878	0.00186108	0.00722959	0.0014926	-0.0330069	0.0132293	downstream	CRV2G00017597(dist=256)	CRV2G00017597	Similar to NPHP3 Nephrocystin-3 (Homo sapiens)	GO:0005515
unitig_818:47130	-0.06125	0.01429	0.991271	0.00149919	0.00872878	0.00187133	0.00722959	0.00150134	-0.0330069	0.0132293	downstream	CRV2G00017597(dist=195)	CRV2G00017597	Similar to NPHP3 Nephrocystin-3 (Homo sapiens)	GO:0005515
unitig_818:47607	-0.06125	0.01429	0.991271	0.00149919	0.00872878	0.00188155	0.00722959	0.00151006	-0.0330069	0.0132293	exonic	CRV2G00017597	CRV2G00017597	Similar to NPHP3 Nephrocystin-3 (Homo sapiens)	GO:0005515
unitig_818:47741	-0.06125	0.01429	0.991271	0.00149919	0.00872878	0.00189174	0.00722959	0.00151875	-0.0330069	0.0132293	exonic	CRV2G00017597	CRV2G00017597	Similar to NPHP3 Nephrocystin-3 (Homo sapiens)	GO:0005515
unitig_170:19266	0.03801	0.00997	0.00121709	0.991256	0.00874444	0.00190192	0.00752736	0.0016245	0.0263693	0.00938653	upstream	CRV2G00019608(dist=227)	CRV2G00019608	Protein of unknown function	0
unitig_277:1635	0.03933	0.01026	0.00125909	0.991135	0.00886504	0.00191225	0.00760594	0.00163341	0.0267685	0.00941834	exonic	CRV2G00021485	CRV2G00021485	Protein of unknown function	GO:0003824
unitig_676:7414	-0.02777	0.007628	0.991121	0.00101477	0.00887903	0.00192257	0.00786427	0.00171464	-0.0209584	0.00861146	intergenic	CRV2G00021966(dist=3205),CRV2G00021967(dist=1087)	CRV2G00021966	Protein of unknown function	0
unitig_658:706786	0.03783	0.009944	0.0012356	0.991117	0.00888272	0.00193287	0.00764712	0.00165123	0.0262759	0.00940043	intergenic	CRV2G00014350(dist=5509),CRV2G00014351(dist=12916)	CRV2G00014350	Protein of unknown function	GO:0000981;GO:0006355;GO:0005634;GO:0008270
unitig_601:20048	0.02798	0.007692	0.0010427	0.99095	0.00905047	0.00194338	0.00800778	0.00176023	0.0210873	0.00867008	upstream	CRV2G00019330(dist=947)	CRV2G00019330	Protein of unknown function	0
unitig_821:225554	0.0311	0.008442	0.00112131	0.990942	0.00905836	0.00195387	0.00793705	0.00173284	0.0231759	0.00916143	intergenic	CRV2G00007970(dist=11584),CRV2G00007971(dist=44918)	CRV2G00007970	Protein of unknown function	GO:0016758;GO:0005975;GO:0016020
unitig_133:6853	0.02067	0.005897	0.000848356	0.990929	0.00907149	0.00196436	0.00822313	0.00178818	0.0154825	0.0057835	intergenic	CRV2G00020497(dist=1165),CRV2G00020498(dist=10207)	CRV2G00020497	Similar to SAT4 Serine/threonine-protein kinase HAL4/SAT4 (Saccharomyces cerevisiae (strain ATCC 204508 / S288c))	GO:0016772;GO:0005524;GO:0004674;GO:0006468;GO:0004672
unitig_225:42189	0.03932	0.01028	0.00129796	0.990892	0.00910832	0.00197486	0.00781036	0.0016784	0.026709	0.00944748	intergenic	NONE(dist=NONE),CRV2G00018752(dist=4392)	CRV2G00018752	Protein of unknown function	0
unitig_225:42215	0.03932	0.01028	0.00129796	0.990892	0.00910832	0.00198534	0.00781036	0.00168746	0.026709	0.00944748	intergenic	NONE(dist=NONE),CRV2G00018752(dist=4366)	CRV2G00018752	Protein of unknown function	0
unitig_785:52243	-0.03475	0.009293	0.99083	0.00121957	0.00916975	0.00199587	0.00795018	0.00174194	-0.0250207	0.00937749	intergenic	CRV2G00019355(dist=15338),CRV2G00019356(dist=3357)	CRV2G00019355	Protein of unknown function	0
unitig_432:16	-0.03267	0.008819	0.990821	0.00117517	0.00917863	0.00200639	0.00800345	0.0017511	-0.0240264	0.00929186	intergenic	NONE(dist=NONE),NONE(dist=NONE)		#N/A	#N/A
unitig_290:14598	0.03794	0.009995	0.00128644	0.990808	0.0091924	0.00201689	0.00790596	0.00172373	0.0262428	0.0094369	exonic	CRV2G00020911	CRV2G00020911	Similar to Has2 Hyaluronan synthase 2 (Heterocephalus glaber)	0
unitig_595:34963	0.06712	0.01533	0.00165765	0.990729	0.00927065	0.00202748	0.007613	0.00164231	0.0351537	0.0152235	exonic	CRV2G00019128	CRV2G00019128	Protein of unknown function	GO:0006355;GO:0000981;GO:0005634;GO:0008270
unitig_673:89613	0.02796	0.00771	0.00108321	0.99064	0.00936033	0.00203817	0.00827713	0.0017976	0.0210228	0.00868262	intergenic	CRV2G00018922(dist=34597),CRV2G00018923(dist=8061)	CRV2G00018922	Protein of unknown function	0
unitig_624:26992	-0.05642	0.01354	0.990596	0.00157918	0.00940438	0.00204889	0.00782519	0.00169651	-0.0311555	0.0117475	intergenic	NONE(dist=NONE),CRV2G00019544(dist=17755)	CRV2G00019544	Protein of unknown function	0
unitig_640:12278	-0.03362	0.009059	0.990558	0.00123561	0.00944201	0.00205964	0.0082064	0.00177881	-0.0244465	0.00936222	exonic	CRV2G00022020	CRV2G00022020	Protein of unknown function	GO:0000981;GO:0006351;GO:0006355;GO:0005634;GO:0003677;GO:0008270
unitig_624:67677	0.02928	0.008039	0.0011337	0.990525	0.00947492	0.0020704	0.00834122	0.00181645	0.0219397	0.0089506	intergenic	CRV2G00019545(dist=15572),NONE(dist=NONE)	CRV2G00019545	Protein of unknown function	GO:0005515
scf_024:101678	-0.04492	0.01145	0.990457	0.00146057	0.00954262	0.00208123	0.00808205	0.00176945	-0.0281215	0.00972237	intergenic	CRV2G00013097(dist=12554),CRV2G00013098(dist=24382)	CRV2G00013097	Similar to RTA1 Protein RTA1 (Saccharomyces cerevisiae (strain ATCC 204508 / S288c))	GO:0006950;GO:0016021
scf_014:981638	-0.02754	0.007633	0.990281	0.00111928	0.00971932	0.00209229	0.00860004	0.00185475	-0.0206552	0.00859995	intergenic	CRV2G00012293(dist=13635),CRV2G00012294(dist=16855)	CRV2G00012293	Protein of unknown function	GO:0005975;GO:0003824
scf_014:981696	-0.02754	0.007633	0.990281	0.00111928	0.00971932	0.00210331	0.00860004	0.00186445	-0.0206552	0.00859995	intergenic	CRV2G00012293(dist=13693),CRV2G00012294(dist=16797)	CRV2G00012293	Protein of unknown function	GO:0005975;GO:0003824
unitig_114:261371	0.0442	0.01133	0.00148818	0.990233	0.0097674	0.00211437	0.00827921	0.00180699	0.027893	0.00970277	upstream	CRV2G00014448(dist=502)	CRV2G00014448	Protein of unknown function	0
unitig_1016:738504	0.03006	0.008255	0.00120714	0.990145	0.00985522	0.00212552	0.00864808	0.00187418	0.0223868	0.00909258	intergenic	CRV2G00014036(dist=1738),CRV2G00014037(dist=6716)	CRV2G00014036	Protein of unknown function	0
scf_010:25249	0.03087	0.008452	0.00123493	0.9901	0.00989958	0.00213671	0.00866465	0.00188391	0.0228797	0.0091956	intergenic	NONE(dist=NONE),CRV2G00010618(dist=8178)	CRV2G00010618	Protein of unknown function	0
unitig_785:52020	-0.0475	0.01198	0.99008	0.00156391	0.00991998	0.00214789	0.00835607	0.0018259	-0.0286577	0.0100095	intergenic	CRV2G00019355(dist=15115),CRV2G00019356(dist=3580)	CRV2G00019355	Protein of unknown function	0
scf_005:4717812	0.04168	0.01084	0.00147326	0.990075	0.00992504	0.00215905	0.00845177	0.00183546	0.0272069	0.00960282	intergenic	CRV2G00003316(dist=22549),CRV2G00003317(dist=14573)	CRV2G00003316	Similar to MexAM1_META1p0182 Uncharacterized oxidoreductase MexAM1_META1p0182 (Methylobacterium extorquens (strain ATCC 14718 / DSM 1338 / JCM 2805 / NCIMB 9133 / AM1))	GO:0008152;GO:0016491
unitig_105:231658	0.02546	0.007136	0.00108901	0.99005	0.00995018	0.00217021	0.00886118	0.00196174	0.0190082	0.0079642	intergenic	CRV2G00018099(dist=17172),CRV2G00018100(dist=14277)	CRV2G00018099	Similar to TIC32 Short-chain dehydrogenase TIC 32, chloroplastic (Arabidopsis thaliana)	GO:0008152;GO:0016491
unitig_213:1882	0.01225	0.003717	0.000644961	0.989957	0.0100426	0.00218147	0.00939766	0.00224957	0.0108767	0.00333641	intergenic	NONE(dist=NONE),NONE(dist=NONE)		#N/A	#N/A
unitig_57:469	0.02192	0.006266	0.000996321	0.989931	0.0100693	0.00219274	0.00907299	0.00217243	0.0162651	0.00641984	downstream	CRV2G00021042(dist=336)	CRV2G00021042	Protein of unknown function	GO:0006470;GO:0008138
unitig_643:92848	0.04811	0.01211	0.00160106	0.98992	0.0100804	0.00220399	0.00847934	0.00184503	0.0287678	0.0101025	intergenic	CRV2G00019327(dist=33900),NONE(dist=NONE)	CRV2G00019327	Similar to betA Oxygen-dependent choline dehydrogenase (Burkholderia multivorans (strain ATCC 17616 / 249))	GO:0055114;GO:0050660;GO:0006066;GO:0016614;GO:0008812
unitig_690:12334	0.03631	0.009716	0.00139528	0.989907	0.010093	0.00221523	0.00869776	0.00190334	0.0254608	0.00950233	intergenic	CRV2G00019731(dist=8104),CRV2G00019732(dist=6453)	CRV2G00019731	Protein of unknown function	0
unitig_586:8217	0.0355	0.009539	0.00138284	0.989871	0.0101293	0.00222649	0.00874647	0.00192283	0.0251343	0.00948641	intergenic	NONE(dist=NONE),NONE(dist=NONE)		#N/A	#N/A
unitig_586:8274	0.0355	0.009539	0.00138284	0.989871	0.0101293	0.00223771	0.00874647	0.00193254	0.0251343	0.00948641	intergenic	NONE(dist=NONE),NONE(dist=NONE)		#N/A	#N/A
unitig_586:8295	0.0355	0.009539	0.00138284	0.989871	0.0101293	0.00224891	0.00874647	0.00194222	0.0251343	0.00948641	intergenic	NONE(dist=NONE),NONE(dist=NONE)		#N/A	#N/A
unitig_394:8614	0.04181	0.01089	0.00152114	0.989803	0.0101966	0.00226016	0.00867548	0.00189362	0.0271826	0.00963927	intergenic	CRV2G00021055(dist=7332),CRV2G00021056(dist=5984)	CRV2G00021055	Protein of unknown function	0
unitig_170:22514	0.03836	0.01017	0.00145526	0.989803	0.010197	0.00227139	0.00874169	0.0019131	0.0261632	0.00955177	upstream	CRV2G00019610(dist=561)	CRV2G00019610	Similar to bcsl1b Probable mitochondrial chaperone BCS1-B (Dictyostelium discoideum)	GO:0034551;GO:0017111;GO:0005524;GO:0000166
unitig_114:733651	0.0305	0.008386	0.00126848	0.989795	0.0102049	0.0022826	0.00893639	0.00213458	0.0226007	0.00917179	intergenic	CRV2G00014625(dist=7703),NONE(dist=NONE)	CRV2G00014625	Protein of unknown function	0
scf_014:981177	-0.03162	0.008653	0.989788	0.00129973	0.010212	0.00229378	0.00891229	0.00197158	-0.0232572	0.00929129	intergenic	CRV2G00012293(dist=13174),CRV2G00012294(dist=17316)	CRV2G00012293	Protein of unknown function	GO:0005975;GO:0003824
scf_014:981392	-0.03162	0.008653	0.989788	0.00129973	0.010212	0.00230493	0.00891229	0.00198138	-0.0232572	0.00929129	intergenic	CRV2G00012293(dist=13389),CRV2G00012294(dist=17101)	CRV2G00012293	Protein of unknown function	GO:0005975;GO:0003824
scf_014:981404	-0.03162	0.008653	0.989788	0.00129973	0.010212	0.00231605	0.00891229	0.00199115	-0.0232572	0.00929129	intergenic	CRV2G00012293(dist=13401),CRV2G00012294(dist=17089)	CRV2G00012293	Protein of unknown function	GO:0005975;GO:0003824
scf_014:981426	-0.03162	0.008653	0.989788	0.00129973	0.010212	0.00232714	0.00891229	0.0020009	-0.0232572	0.00929129	intergenic	CRV2G00012293(dist=13423),CRV2G00012294(dist=17067)	CRV2G00012293	Protein of unknown function	GO:0005975;GO:0003824
scf_014:981748	-0.03162	0.008653	0.989788	0.00129973	0.010212	0.0023382	0.00891229	0.00201062	-0.0232572	0.00929129	intergenic	CRV2G00012293(dist=13745),CRV2G00012294(dist=16745)	CRV2G00012293	Protein of unknown function	GO:0005975;GO:0003824
scf_014:982016	-0.03162	0.008653	0.989788	0.00129973	0.010212	0.00234923	0.00891229	0.00202032	-0.0232572	0.00929129	intergenic	CRV2G00012293(dist=14013),CRV2G00012294(dist=16477)	CRV2G00012293	Protein of unknown function	GO:0005975;GO:0003824
scf_014:982149	-0.03162	0.008653	0.989788	0.00129973	0.010212	0.00236023	0.00891229	0.00202998	-0.0232572	0.00929129	intergenic	CRV2G00012293(dist=14146),CRV2G00012294(dist=16344)	CRV2G00012293	Protein of unknown function	GO:0005975;GO:0003824
scf_014:982795	-0.03162	0.008653	0.989788	0.00129973	0.010212	0.00237119	0.00891229	0.00203962	-0.0232572	0.00929129	intergenic	CRV2G00012293(dist=14792),CRV2G00012294(dist=15698)	CRV2G00012293	Protein of unknown function	GO:0005975;GO:0003824
scf_014:982808	-0.03162	0.008653	0.989788	0.00129973	0.010212	0.00238213	0.00891229	0.00204923	-0.0232572	0.00929129	intergenic	CRV2G00012293(dist=14805),CRV2G00012294(dist=15685)	CRV2G00012293	Protein of unknown function	GO:0005975;GO:0003824
scf_014:984703	-0.03162	0.008653	0.989788	0.00129973	0.010212	0.00239303	0.00891229	0.00205882	-0.0232572	0.00929129	intergenic	CRV2G00012293(dist=16700),CRV2G00012294(dist=13790)	CRV2G00012293	Protein of unknown function	GO:0005975;GO:0003824
scf_014:985392	-0.03162	0.008653	0.989788	0.00129973	0.010212	0.00240391	0.00891229	0.00206838	-0.0232572	0.00929129	intergenic	CRV2G00012293(dist=17389),CRV2G00012294(dist=13101)	CRV2G00012293	Protein of unknown function	GO:0005975;GO:0003824
scf_014:987148	-0.03162	0.008653	0.989788	0.00129973	0.010212	0.00241475	0.00891229	0.00207791	-0.0232572	0.00929129	intergenic	CRV2G00012293(dist=19145),CRV2G00012294(dist=11345)	CRV2G00012293	Protein of unknown function	GO:0005975;GO:0003824
scf_014:987180	-0.03162	0.008653	0.989788	0.00129973	0.010212	0.00242557	0.00891229	0.00208741	-0.0232572	0.00929129	intergenic	CRV2G00012293(dist=19177),CRV2G00012294(dist=11313)	CRV2G00012293	Protein of unknown function	GO:0005975;GO:0003824
scf_014:987186	-0.03162	0.008653	0.989788	0.00129973	0.010212	0.00243635	0.00891229	0.00209689	-0.0232572	0.00929129	intergenic	CRV2G00012293(dist=19183),CRV2G00012294(dist=11307)	CRV2G00012293	Protein of unknown function	GO:0005975;GO:0003824
scf_014:987222	-0.03162	0.008653	0.989788	0.00129973	0.010212	0.00244711	0.00891229	0.00210635	-0.0232572	0.00929129	intergenic	CRV2G00012293(dist=19219),CRV2G00012294(dist=11271)	CRV2G00012293	Protein of unknown function	GO:0005975;GO:0003824
scf_014:987342	-0.03162	0.008653	0.989788	0.00129973	0.010212	0.00245783	0.00891229	0.00211577	-0.0232572	0.00929129	intergenic	CRV2G00012293(dist=19339),CRV2G00012294(dist=11151)	CRV2G00012293	Protein of unknown function	GO:0005975;GO:0003824
scf_014:987411	-0.03162	0.008653	0.989788	0.00129973	0.010212	0.00246853	0.00891229	0.00212517	-0.0232572	0.00929129	intergenic	CRV2G00012293(dist=19408),CRV2G00012294(dist=11082)	CRV2G00012293	Protein of unknown function	GO:0005975;GO:0003824
scf_010:22912	0.02649	0.00741	0.00115702	0.98976	0.0102398	0.00247923	0.00908278	0.00218191	0.0197811	0.00832828	intergenic	NONE(dist=NONE),CRV2G00010618(dist=10515)	CRV2G00010618	Protein of unknown function	0
unitig_41:51629	0.03062	0.008421	0.00128418	0.989708	0.0102919	0.00248998	0.00900767	0.00215347	0.0226587	0.00919186	intergenic	CRV2G00016356(dist=18625),CRV2G00016357(dist=14713)	CRV2G00016356	Protein of unknown function	0
unitig_659:103814	0.03417	0.009262	0.00139793	0.989568	0.0104325	0.00250089	0.00903457	0.00216293	0.0245027	0.0094679	intergenic	CRV2G00019300(dist=2850),NONE(dist=NONE)	CRV2G00019300	Similar to HET-E1 Vegetative incompatibility protein HET-E-1 (Podospora anserina)	GO:0005515
unitig_595:57755	0.02275	0.006495	0.00106741	0.989544	0.0104557	0.0025118	0.00938831	0.0022301	0.0168405	0.00683081	exonic	CRV2G00019134	CRV2G00019134	Similar to hsp30 30 kDa heat shock protein (Emericella nidulans (strain FGSC A4 / ATCC 38163 / CBS 112.46 / NRRL 194 / M139))	0
unitig_727:2450	-0.021	0.006062	0.989494	0.00101678	0.0105057	0.00252275	0.00948887	0.00233665	-0.0155972	0.00600875	intergenic	NONE(dist=NONE),CRV2G00020351(dist=6799)	CRV2G00020351	Protein of unknown function	GO:0055085;GO:0022857;GO:0016021
unitig_697:243870	0.02903	0.008056	0.00127685	0.989437	0.0105633	0.00253375	0.00928644	0.00222033	0.0215905	0.00896798	exonic	CRV2G00018430	CRV2G00018430	Protein of unknown function	GO:0003676;GO:0004523
unitig_41:266231	0.03616	0.00972	0.00146619	0.989435	0.0105655	0.00254472	0.00909929	0.00219138	0.0253063	0.00954263	intergenic	CRV2G00016399(dist=10027),CRV2G00016400(dist=16563)	CRV2G00016399	Protein of unknown function	0
unitig_1018:564354	0.05822	0.01398	0.00183466	0.989356	0.010644	0.00255577	0.00880938	0.00195196	0.0313865	0.0123642	intergenic	CRV2G00015919(dist=30050),NONE(dist=NONE)	CRV2G00015919	Similar to ANK1 Ankyrin-1 (Homo sapiens)	GO:0005515
unitig_842:20276	0.02829	0.007882	0.00126866	0.989334	0.0106656	0.00256682	0.0093969	0.00223985	0.0210612	0.00882466	intronic	CRV2G00020025	CRV2G00020025	Protein of unknown function	0
unitig_818:22207	0.02743	0.007671	0.00124342	0.989325	0.010675	0.00257785	0.00943158	0.00226899	0.0204355	0.0086186	intergenic	NONE(dist=NONE),CRV2G00017594(dist=16117)	CRV2G00017594	Protein of unknown function	0
scf_014:972435	-0.03288	0.008983	0.989319	0.00140249	0.0106813	0.00258886	0.0092788	0.00221068	-0.0238396	0.00941997	intergenic	CRV2G00012293(dist=4432),CRV2G00012294(dist=26058)	CRV2G00012293	Protein of unknown function	GO:0005975;GO:0003824
scf_001:3852946	-0.03192	0.008766	0.989206	0.00139314	0.0107939	0.00259999	0.00940078	0.00225927	-0.0233169	0.00935668	intergenic	CRV2G00004612(dist=13277),CRV2G00004613(dist=10514)	CRV2G00004612	Protein of unknown function	GO:0055085;GO:0016021
unitig_200:26840	0.05617	0.01364	0.00184316	0.989183	0.0108173	0.00261113	0.00897413	0.00214401	0.0307114	0.0117947	intergenic	CRV2G00019727(dist=1327),CRV2G00019728(dist=4089)	CRV2G00019727	Protein of unknown function	0
unitig_114:736612	0.04125	0.01083	0.00162071	0.989151	0.0108493	0.00262228	0.00922855	0.00220101	0.0268914	0.0096928	intergenic	CRV2G00014625(dist=10664),NONE(dist=NONE)	CRV2G00014625	Protein of unknown function	0
unitig_170:19368	0.03809	0.01018	0.00158844	0.988947	0.0110532	0.00263367	0.00946476	0.00228843	0.0258972	0.00963136	upstream;downstream	CRV2G00019608(dist=125);CRV2G00019609(dist=125)	CRV2G00019608	Protein of unknown function	0
unitig_170:19373	0.03809	0.01018	0.00158844	0.988947	0.0110532	0.00264503	0.00946476	0.00229812	0.0258972	0.00963136	upstream;downstream	CRV2G00019608(dist=120);CRV2G00019609(dist=120)	CRV2G00019608	Protein of unknown function	0
unitig_170:19389	0.03809	0.01018	0.00158844	0.988947	0.0110532	0.00265636	0.00946476	0.00230778	0.0258972	0.00963136	upstream;downstream	CRV2G00019608(dist=104);CRV2G00019609(dist=104)	CRV2G00019608	Protein of unknown function	0
unitig_170:19425	0.03809	0.01018	0.00158844	0.988947	0.0110532	0.00266767	0.00946476	0.00231741	0.0258972	0.00963136	upstream;downstream	CRV2G00019608(dist=68);CRV2G00019609(dist=68)	CRV2G00019608	Protein of unknown function	0
unitig_170:22713	0.03953	0.01049	0.00162498	0.988916	0.0110839	0.00267898	0.0094589	0.00227872	0.0263472	0.0096677	upstream	CRV2G00019610(dist=362)	CRV2G00019610	Similar to bcsl1b Probable mitochondrial chaperone BCS1-B (Dictyostelium discoideum)	GO:0034551;GO:0017111;GO:0005524;GO:0000166
scf_024:37531	-0.04412	0.01144	0.988785	0.00173748	0.0112154	0.00269044	0.00947792	0.00232703	-0.0275603	0.00986892	intergenic	CRV2G00013074(dist=8680),CRV2G00013075(dist=3341)	CRV2G00013074	Similar to ANKRD50 Ankyrin repeat domain-containing protein 50 (Homo sapiens)	GO:0005515
unitig_170:22094	0.03689	0.009931	0.00158734	0.988782	0.0112184	0.00270187	0.00963103	0.00235603	0.0254484	0.00961898	upstream	CRV2G00019609,CRV2G00019610(dist=981)	CRV2G00019609	Protein of unknown function	GO:0046872
unitig_170:22235	0.03689	0.009931	0.00158734	0.988782	0.0112184	0.00271327	0.00963103	0.00236576	0.0254484	0.00961898	upstream	CRV2G00019609,CRV2G00019610(dist=840)	CRV2G00019609	Protein of unknown function	GO:0046872
unitig_170:22262	0.03689	0.009931	0.00158734	0.988782	0.0112184	0.00272464	0.00963103	0.00237546	0.0254484	0.00961898	upstream	CRV2G00019609,CRV2G00019610(dist=813)	CRV2G00019609	Protein of unknown function	GO:0046872
unitig_170:39074	0.03008	0.008359	0.00140867	0.988729	0.0112715	0.00273605	0.00986283	0.00242434	0.0221615	0.00917761	intergenic	CRV2G00019612(dist=1350),CRV2G00019613(dist=1204)	CRV2G00019612	Protein of unknown function	GO:0016772;GO:0005524;GO:0006468;GO:0004672
unitig_170:39101	0.03008	0.008359	0.00140867	0.988729	0.0112715	0.00274743	0.00986283	0.00243419	0.0221615	0.00917761	intergenic	CRV2G00019612(dist=1377),CRV2G00019613(dist=1177)	CRV2G00019612	Protein of unknown function	GO:0016772;GO:0005524;GO:0006468;GO:0004672
unitig_170:39112	0.03008	0.008359	0.00140867	0.988729	0.0112715	0.00275878	0.00986283	0.00244402	0.0221615	0.00917761	intergenic	CRV2G00019612(dist=1388),CRV2G00019613(dist=1166)	CRV2G00019612	Protein of unknown function	GO:0016772;GO:0005524;GO:0006468;GO:0004672
unitig_170:39136	0.03008	0.008359	0.00140867	0.988729	0.0112715	0.0027701	0.00986283	0.00245382	0.0221615	0.00917761	intergenic	CRV2G00019612(dist=1412),CRV2G00019613(dist=1142)	CRV2G00019612	Protein of unknown function	GO:0016772;GO:0005524;GO:0006468;GO:0004672
unitig_170:39153	0.03008	0.008359	0.00140867	0.988729	0.0112715	0.00278139	0.00986283	0.00246359	0.0221615	0.00917761	intergenic	CRV2G00019612(dist=1429),CRV2G00019613(dist=1125)	CRV2G00019612	Protein of unknown function	GO:0016772;GO:0005524;GO:0006468;GO:0004672
unitig_170:39182	0.03008	0.008359	0.00140867	0.988729	0.0112715	0.00279265	0.00986283	0.00247334	0.0221615	0.00917761	intergenic	CRV2G00019612(dist=1458),CRV2G00019613(dist=1096)	CRV2G00019612	Protein of unknown function	GO:0016772;GO:0005524;GO:0006468;GO:0004672
unitig_723:51649	0.036	0.009742	0.00158324	0.988671	0.0113291	0.00280396	0.00974587	0.00240466	0.0250938	0.00960484	upstream	CRV2G00016677(dist=315)	CRV2G00016677	Protein of unknown function	0
unitig_821:2192487	0.04183	0.01099	0.00171836	0.988643	0.0113566	0.00281527	0.00963819	0.00238514	0.0269444	0.0097683	intergenic	CRV2G00008612(dist=10726),CRV2G00008613(dist=1745)	CRV2G00008612	Similar to TP53I3 Quinone oxidoreductase PIG3 (Homo sapiens)	GO:0055114;GO:0016747;GO:0008270;GO:0016491
scf_003:132009	-0.03208	0.008847	0.988589	0.00148941	0.0114114	0.00282663	0.00992195	0.00248314	-0.0232937	0.00941049	downstream	CRV2G00006980(dist=980)	CRV2G00006980	Protein of unknown function	0
unitig_41:257443	0.04436	0.01151	0.00178968	0.988512	0.0114883	0.00283805	0.00969859	0.00239488	0.0275632	0.0099146	intergenic	CRV2G00016399(dist=1239),CRV2G00016400(dist=25351)	CRV2G00016399	Protein of unknown function	0
unitig_676:5045	-0.04372	0.01139	0.988422	0.00179351	0.0115783	0.00284957	0.00978481	0.00241446	-0.0273865	0.00988425	downstream	CRV2G00021966(dist=836)	CRV2G00021966	Protein of unknown function	0
unitig_659:88380	0.06194	0.01471	0.00206315	0.988412	0.0115878	0.00286107	0.00952463	0.00234628	0.0323754	0.0135622	intergenic	CRV2G00019298(dist=8698),CRV2G00019299(dist=4863)	CRV2G00019298	Protein of unknown function	0
unitig_772:8842	0.0342	0.009366	0.00160502	0.988229	0.0117707	0.00287277	0.0101657	0.00253246	0.0242635	0.00957178	exonic	CRV2G00022193	CRV2G00022193	Protein of unknown function	0
unitig_785:37217	-0.04367	0.0114	0.988171	0.00183637	0.0118285	0.00288453	0.00999217	0.00249301	-0.0273236	0.00990798	downstream	CRV2G00019354,CRV2G00019355(dist=312)	CRV2G00019354	Protein of unknown function	0
unitig_785:37243	-0.04367	0.0114	0.988171	0.00183637	0.0118285	0.00289625	0.00999217	0.00250285	-0.0273236	0.00990798	downstream	CRV2G00019354,CRV2G00019355(dist=338)	CRV2G00019354	Protein of unknown function	0
unitig_785:37305	-0.04367	0.0114	0.988171	0.00183637	0.0118285	0.00290794	0.00999217	0.00251266	-0.0273236	0.00990798	downstream	CRV2G00019355(dist=400)	CRV2G00019355	Protein of unknown function	0
unitig_821:246247	0.04461	0.01159	0.00186094	0.988134	0.0118658	0.00291965	0.0100049	0.00252247	0.0275476	0.00997245	intergenic	CRV2G00007970(dist=32277),CRV2G00007971(dist=24225)	CRV2G00007970	Protein of unknown function	GO:0016758;GO:0005975;GO:0016020
unitig_674:13557	0.03305	0.00912	0.00161824	0.987928	0.012072	0.0029316	0.0104538	0.00260291	0.0236736	0.00952665	exonic	CRV2G00019010	CRV2G00019010	Similar to bcsl1b Probable mitochondrial chaperone BCS1-B (Dictyostelium discoideum)	GO:0034551;GO:0017111;GO:0005524;GO:0000166
unitig_624:1200	0.04075	0.01083	0.00183568	0.987824	0.0121763	0.00294365	0.0103406	0.00257242	0.0264859	0.00981122	intergenic	NONE(dist=NONE),CRV2G00019544(dist=43547)	CRV2G00019544	Protein of unknown function	0
scf_010:24029	0.02477	0.007107	0.00136714	0.987691	0.012309	0.00295585	0.0109419	0.00273809	0.0182141	0.00779982	intergenic	NONE(dist=NONE),CRV2G00010618(dist=9398)	CRV2G00010618	Protein of unknown function	0
scf_010:24054	0.02477	0.007107	0.00136714	0.987691	0.012309	0.00296801	0.0109419	0.00274853	0.0182141	0.00779982	intergenic	NONE(dist=NONE),CRV2G00010618(dist=9373)	CRV2G00010618	Protein of unknown function	0
unitig_659:35476	0.05931	0.01433	0.00218041	0.987652	0.0123477	0.00298019	0.0101673	0.00254243	0.0312949	0.0127863	intergenic	CRV2G00019287(dist=6239),CRV2G00019288(dist=6750)	CRV2G00019287	Similar to hsp30 30 kDa heat shock protein (Emericella nidulans (strain FGSC A4 / ATCC 38163 / CBS 112.46 / NRRL 194 / M139))	0
unitig_659:35488	0.05931	0.01433	0.00218041	0.987652	0.0123477	0.00299234	0.0101673	0.00255237	0.0312949	0.0127863	intergenic	CRV2G00019287(dist=6251),CRV2G00019288(dist=6738)	CRV2G00019287	Similar to hsp30 30 kDa heat shock protein (Emericella nidulans (strain FGSC A4 / ATCC 38163 / CBS 112.46 / NRRL 194 / M139))	0
unitig_170:19049	0.0401	0.01071	0.00185859	0.987602	0.0123978	0.00300452	0.0105392	0.00261318	0.0262577	0.00981074	upstream	CRV2G00019607,CRV2G00019608(dist=444)	CRV2G00019607	Protein of unknown function	GO:0016772
scf_003:420256	0.06178	0.01476	0.00222492	0.987591	0.0124093	0.00301669	0.0101844	0.00256231	0.0320932	0.01354	intergenic	CRV2G00007051(dist=24491),CRV2G00007052(dist=40024)	CRV2G00007051	Protein of unknown function	0
scf_014:988566	-0.03725	0.0101	0.987544	0.00179757	0.0124559	0.00302889	0.0106583	0.00264423	-0.0253408	0.0097343	intergenic	CRV2G00012293(dist=20563),CRV2G00012294(dist=9927)	CRV2G00012293	Protein of unknown function	GO:0005975;GO:0003824
unitig_114:737071	-0.05025	0.01272	0.987526	0.00207109	0.0124741	0.00304107	0.010403	0.00259273	-0.0287687	0.0106717	intergenic	CRV2G00014625(dist=11123),NONE(dist=NONE)	CRV2G00014625	Protein of unknown function	0
unitig_41:231909	0.03565	0.009745	0.00175772	0.987521	0.0124785	0.00305323	0.0107208	0.00265462	0.024743	0.00968476	intergenic	CRV2G00016392(dist=25417),CRV2G00016393(dist=10490)	CRV2G00016392	Similar to ARB_01230 Kelch repeat-containing protein ARB_01230 (Arthroderma benhamiae (strain ATCC MYA-4681 / CBS 112371))	GO:0005515
unitig_639:35077	0.031	0.00866	0.00161513	0.987518	0.0124817	0.00306537	0.0108665	0.00270676	0.0225195	0.00936399	upstream;downstream	CRV2G00019787(dist=469);CRV2G00019788(dist=435)	CRV2G00019787	Similar to Phenol hydroxylase (Trichosporon cutaneum)	GO:0008152;GO:0016491
unitig_1016:868783	0.02932	0.008253	0.00156123	0.987492	0.0125076	0.00307751	0.0109464	0.00275895	0.0214904	0.0091177	intergenic	CRV2G00014077(dist=12354),NONE(dist=NONE)	CRV2G00014077	Similar to tsaC1 4-formylbenzenesulfonate dehydrogenase TsaC1/TsaC2 (Comamonas testosteroni)	GO:0008152;GO:0016491
unitig_626:409613	0.04034	0.01077	0.00188622	0.987473	0.012527	0.00308964	0.0106407	0.00263389	0.0263024	0.0098305	intergenic	CRV2G00017143(dist=36219),CRV2G00017144(dist=12600)	CRV2G00017143	Protein of unknown function	0
unitig_659:57169	0.05361	0.01334	0.00213509	0.987469	0.0125308	0.00310174	0.0103957	0.00258258	0.0296023	0.0113132	intergenic	CRV2G00019292(dist=1732),CRV2G00019293(dist=5771)	CRV2G00019292	Similar to chit42 Endochitinase 42 (Trichoderma harzianum)	GO:0004568;GO:0004553;GO:0005975;GO:0003824;GO:0006032
unitig_105:229817	0.04225	0.01117	0.00193784	0.987424	0.0125758	0.00311387	0.010638	0.00262354	0.0268149	0.00990981	intergenic	CRV2G00018099(dist=15331),CRV2G00018100(dist=16118)	CRV2G00018099	Similar to TIC32 Short-chain dehydrogenase TIC 32, chloroplastic (Arabidopsis thaliana)	GO:0008152;GO:0016491
unitig_821:1862037	0.0307	0.008597	0.00162716	0.987369	0.012631	0.00312604	0.0110038	0.00276941	0.0223226	0.00933474	downstream	CRV2G00008511(dist=908)	CRV2G00008511	Similar to hexa1 Beta-hexosaminidase subunit A1 (Dictyostelium discoideum)	GO:0004563;GO:0004553;GO:0005975;GO:0003824
unitig_595:20742	-0.02763	0.007845	0.987324	0.00152373	0.0126757	0.00313824	0.011152	0.00282203	-0.0203164	0.00875898	exonic	CRV2G00019124	CRV2G00019124	Protein of unknown function	GO:0008152;GO:0016846
unitig_595:20751	-0.02763	0.007845	0.987324	0.00152373	0.0126757	0.0031504	0.011152	0.00283252	-0.0203164	0.00875898	exonic	CRV2G00019124	CRV2G00019124	Protein of unknown function	GO:0008152;GO:0016846
unitig_595:20827	-0.02763	0.007845	0.987324	0.00152373	0.0126757	0.00316254	0.011152	0.00284299	-0.0203164	0.00875898	exonic	CRV2G00019124	CRV2G00019124	Protein of unknown function	GO:0008152;GO:0016846
unitig_595:20843	-0.02763	0.007845	0.987324	0.00152373	0.0126757	0.00317464	0.011152	0.00285342	-0.0203164	0.00875898	exonic	CRV2G00019124	CRV2G00019124	Protein of unknown function	GO:0008152;GO:0016846
unitig_651:7011	-0.02225	0.006495	0.98725	0.0013246	0.0127499	0.00318681	0.0114253	0.00289604	-0.0162982	0.00669748	intergenic	NONE(dist=NONE),NONE(dist=NONE)		#N/A	#N/A
unitig_333:189316	0.02417	0.006983	0.00140773	0.987195	0.0128048	0.00319901	0.0113971	0.00288537	0.0177097	0.00757085	intergenic	CRV2G00018666(dist=10252),CRV2G00018668(dist=22400)	CRV2G00018666	Protein of unknown function	GO:0003676;GO:0046872
unitig_595:17257	0.03256	0.009054	0.00171814	0.987178	0.0128223	0.00321121	0.0111041	0.00279044	0.023304	0.00953721	upstream	CRV2G00019121,CRV2G00019122(dist=555)	CRV2G00019121	Similar to Wwox WW domain-containing oxidoreductase (Mus musculus)	GO:0008152;GO:0016491
unitig_284:9652	0.04438	0.01162	0.00202947	0.987161	0.0128386	0.0032234	0.0108092	0.00268592	0.0273006	0.0100565	UTR3	CRV2G00020539(CRV2T00020539_1:c.*228T>C)	CRV2G00020539	Protein of unknown function	0
unitig_284:9677	0.04438	0.01162	0.00202947	0.987161	0.0128386	0.00323555	0.0108092	0.00269632	0.0273006	0.0100565	UTR3	CRV2G00020539(CRV2T00020539_1:c.*203A>G)	CRV2G00020539	Protein of unknown function	0
unitig_785:52561	-0.04508	0.01176	0.987147	0.00204636	0.0128532	0.00324769	0.0108069	0.00267549	-0.0274671	0.0101089	intergenic	CRV2G00019355(dist=15656),CRV2G00019356(dist=3039)	CRV2G00019355	Protein of unknown function	0
unitig_105:84252	0.03629	0.009917	0.00184289	0.987107	0.012893	0.00325986	0.0110501	0.0027799	0.0249144	0.00973875	intergenic	CRV2G00018065(dist=7766),CRV2G00018066(dist=2037)	CRV2G00018065	Protein of unknown function	0
unitig_200:26925	0.05275	0.01322	0.00220351	0.987041	0.012959	0.00327207	0.0107555	0.00266504	0.029289	0.0111697	intergenic	CRV2G00019727(dist=1412),CRV2G00019728(dist=4004)	CRV2G00019727	Protein of unknown function	0
unitig_41:51622	0.03123	0.008748	0.00170073	0.986998	0.0130015	0.00328431	0.0113008	0.00286402	0.0225687	0.00941862	intergenic	CRV2G00016356(dist=18618),CRV2G00016357(dist=14720)	CRV2G00016356	Protein of unknown function	0
unitig_196:16259	0.04894	0.01252	0.00215396	0.98696	0.0130397	0.00329657	0.0108858	0.00271721	0.0283421	0.0105339	intronic	CRV2G00019377	CRV2G00019377	Protein of unknown function	0
unitig_196:16337	0.04894	0.01252	0.00215396	0.98696	0.0130397	0.00330879	0.0108858	0.00272763	0.0283421	0.0105339	intronic	CRV2G00019377	CRV2G00019377	Protein of unknown function	0
unitig_821:1867832	-0.02877	0.008157	0.986834	0.00163582	0.0131661	0.00332114	0.0115303	0.00290682	-0.0210383	0.009042	upstream	CRV2G00008512(dist=967)	CRV2G00008512	Similar to CHS8 Chitin synthase 8 (Ustilago maydis (strain 521 / FGSC 9021))	GO:0016758
unitig_821:1868559	-0.02877	0.008157	0.986834	0.00163582	0.0131661	0.00333347	0.0115303	0.00291758	-0.0210383	0.009042	intergenic	CRV2G00008512(dist=1694),CRV2G00008513(dist=24555)	CRV2G00008512	Similar to CHS8 Chitin synthase 8 (Ustilago maydis (strain 521 / FGSC 9021))	GO:0016758
unitig_821:1868565	-0.02877	0.008157	0.986834	0.00163582	0.0131661	0.00334576	0.0115303	0.0029283	-0.0210383	0.009042	intergenic	CRV2G00008512(dist=1700),CRV2G00008513(dist=24549)	CRV2G00008512	Similar to CHS8 Chitin synthase 8 (Ustilago maydis (strain 521 / FGSC 9021))	GO:0016758
scf_005:4825858	0.02989	0.008438	0.00169047	0.986746	0.0132545	0.00335813	0.011564	0.00294973	0.0217435	0.009249	intergenic	CRV2G00003334(dist=5181),CRV2G00003335(dist=14178)	CRV2G00003334	Protein of unknown function	0
scf_004:615157	0.04767	0.0123	0.00218266	0.986679	0.0133215	0.00337055	0.0111388	0.00281151	0.0279888	0.0104024	exonic	CRV2G00009988	CRV2G00009988	Protein of unknown function	0
unitig_796:15880	0.03743	0.0102	0.00194789	0.986665	0.0133349	0.00338296	0.011387	0.0028747	0.025244	0.00981006	UTR5	CRV2G00020794(CRV2T00020794_1:c.-193G>A)	CRV2G00020794	Similar to lepG Trans-enoyl reductase lepG (Aspergillus flavus (strain ATCC 200026 / FGSC A1120 / NRRL 3357 / JCM 12722 / SRRC 167))	GO:0055114;GO:0016747;GO:0008270;GO:0016491
unitig_391:6246	-0.01667	0.005087	0.98651	0.00116347	0.0134897	0.00339553	0.0123262	0.00320192	-0.013006	0.00449323	intergenic	CRV2G00021626(dist=1304),CRV2G00021627(dist=1680)	CRV2G00021626	Protein of unknown function	0
unitig_170:22492	0.03855	0.01046	0.00201647	0.986441	0.0135587	0.00340815	0.0115423	0.00293902	0.0255736	0.00986299	upstream	CRV2G00019610(dist=583)	CRV2G00019610	Similar to bcsl1b Probable mitochondrial chaperone BCS1-B (Dictyostelium discoideum)	GO:0034551;GO:0017111;GO:0005524;GO:0000166
unitig_289:9003	0.06175	0.01486	0.00246279	0.986408	0.0135925	0.00342079	0.0111297	0.00280098	0.0317747	0.0135712	downstream	CRV2G00018834(dist=567)	CRV2G00018834	Similar to FUS6 Efflux pump FUS6 (Gibberella fujikuroi (strain CBS 195.34 / IMI 58289 / NRRL A-6831))	GO:0055085;GO:0016021
scf_022:2337166	0.03559	0.009806	0.00193758	0.986399	0.0136009	0.0034334	0.0116633	0.00296054	0.0245228	0.00976349	intergenic	CRV2G00005444(dist=48084),CRV2G00005445(dist=6387)	CRV2G00005444	Protein of unknown function	0
unitig_821:2159805	0.03569	0.009833	0.00195161	0.986332	0.013668	0.00344607	0.0117164	0.00297139	0.0245505	0.00977231	intergenic	CRV2G00008602(dist=2222),CRV2G00008603(dist=1798)	CRV2G00008602	Protein of unknown function	0
scf_022:878397	0.0304	0.008597	0.00179564	0.986166	0.0138344	0.00345891	0.0120387	0.00310315	0.0219682	0.00935332	intergenic	CRV2G00004935(dist=16117),CRV2G00004936(dist=12643)	CRV2G00004935	Protein of unknown function	0
scf_003:457816	0.03478	0.009638	0.00195526	0.986132	0.0138679	0.00347176	0.0119127	0.00298246	0.0241502	0.0097441	intergenic	CRV2G00007051(dist=62051),CRV2G00007052(dist=2464)	CRV2G00007051	Protein of unknown function	0
unitig_821:1849976	-0.0356	0.009832	0.986028	0.00199849	0.013972	0.00348471	0.0119735	0.0030813	-0.0244641	0.00978933	intergenic	CRV2G00008510(dist=18003),CRV2G00008511(dist=12969)	CRV2G00008510	Protein of unknown function	0
unitig_464:3830	0.03467	0.00962	0.00197052	0.986015	0.0139847	0.00349764	0.0120142	0.00309222	0.0240849	0.00974595	exonic	CRV2G00021614	CRV2G00021614	Protein of unknown function	GO:0055114;GO:0008703;GO:0009231
unitig_697:241729	0.0326	0.009137	0.00190283	0.985995	0.0140053	0.00351057	0.0121024	0.00314679	0.0231354	0.00960834	intronic	CRV2G00018429	CRV2G00018429	Protein of unknown function	0
unitig_673:80565	0.0288	0.008216	0.00176664	0.985937	0.0140631	0.00352353	0.0122965	0.00319089	0.0209404	0.00908586	intergenic	CRV2G00018922(dist=25549),CRV2G00018923(dist=17109)	CRV2G00018922	Protein of unknown function	0
unitig_170:22139	0.03719	0.0102	0.00207587	0.985857	0.0141426	0.00353656	0.0120667	0.00311408	0.0250208	0.00986284	upstream	CRV2G00019609,CRV2G00019610(dist=936)	CRV2G00019609	Protein of unknown function	GO:0046872
unitig_821:2369391	0.02537	0.007358	0.00163469	0.985847	0.0141533	0.00354957	0.0125186	0.00324632	0.0184919	0.00810204	intergenic	CRV2G00008665(dist=11429),CRV2G00008666(dist=3021)	CRV2G00008665	Protein of unknown function	0
unitig_723:51604	0.02529	0.007339	0.00163459	0.985821	0.0141785	0.00356258	0.0125439	0.00325749	0.0184297	0.00807295	upstream	CRV2G00016677(dist=270)	CRV2G00016677	Protein of unknown function	0
unitig_659:54351	0.03298	0.009238	0.00194495	0.985813	0.0141874	0.00357557	0.0122424	0.00315783	0.0232926	0.00964949	exonic	CRV2G00019292	CRV2G00019292	Similar to chit42 Endochitinase 42 (Trichoderma harzianum)	GO:0004568;GO:0004553;GO:0005975;GO:0003824;GO:0006032
unitig_659:54459	0.03298	0.009238	0.00194495	0.985813	0.0141874	0.00358853	0.0122424	0.00316884	0.0232926	0.00964949	exonic	CRV2G00019292	CRV2G00019292	Similar to chit42 Endochitinase 42 (Trichoderma harzianum)	GO:0004568;GO:0004553;GO:0005975;GO:0003824;GO:0006032
unitig_821:226769	0.04142	0.01112	0.00221865	0.985712	0.0142878	0.00360157	0.0120691	0.00312499	0.0262802	0.0100281	intergenic	CRV2G00007970(dist=12799),CRV2G00007971(dist=43703)	CRV2G00007970	Protein of unknown function	GO:0016758;GO:0005975;GO:0016020
unitig_823:320365	0.02997	0.008519	0.00184969	0.985692	0.0143075	0.00361461	0.0124579	0.00323517	0.0216454	0.00930951	upstream	CRV2G00015602(dist=722)	CRV2G00015602	Protein of unknown function	0
unitig_114:735616	-0.04712	0.01228	0.985517	0.00238718	0.0144826	0.00362783	0.0120954	0.0031359	-0.0276433	0.0104505	intergenic	CRV2G00014625(dist=9668),NONE(dist=NONE)	CRV2G00014625	Protein of unknown function	0
unitig_785:41687	-0.055	0.01375	0.985508	0.00253829	0.0144916	0.00364104	0.0119533	0.00299355	-0.029561	0.0117796	intergenic	CRV2G00019355(dist=4782),CRV2G00019356(dist=13913)	CRV2G00019355	Protein of unknown function	0
unitig_785:41708	-0.055	0.01375	0.985508	0.00253829	0.0144916	0.0036542	0.0119533	0.00300461	-0.029561	0.0117796	intergenic	CRV2G00019355(dist=4803),CRV2G00019356(dist=13892)	CRV2G00019355	Protein of unknown function	0
unitig_785:41722	-0.055	0.01375	0.985508	0.00253829	0.0144916	0.00366734	0.0119533	0.00301564	-0.029561	0.0117796	intergenic	CRV2G00019355(dist=4817),CRV2G00019356(dist=13878)	CRV2G00019355	Protein of unknown function	0
unitig_785:41754	-0.055	0.01375	0.985508	0.00253829	0.0144916	0.00368044	0.0119533	0.00302665	-0.029561	0.0117796	intergenic	CRV2G00019355(dist=4849),CRV2G00019356(dist=13846)	CRV2G00019355	Protein of unknown function	0
unitig_785:41767	-0.055	0.01375	0.985508	0.00253829	0.0144916	0.00369352	0.0119533	0.00303763	-0.029561	0.0117796	intergenic	CRV2G00019355(dist=4862),CRV2G00019356(dist=13833)	CRV2G00019355	Protein of unknown function	0
unitig_785:41773	-0.055	0.01375	0.985508	0.00253829	0.0144916	0.00370656	0.0119533	0.00304858	-0.029561	0.0117796	intergenic	CRV2G00019355(dist=4868),CRV2G00019356(dist=13827)	CRV2G00019355	Protein of unknown function	0
unitig_785:41783	-0.055	0.01375	0.985508	0.00253829	0.0144916	0.00371957	0.0119533	0.00305951	-0.029561	0.0117796	intergenic	CRV2G00019355(dist=4878),CRV2G00019356(dist=13817)	CRV2G00019355	Protein of unknown function	0
unitig_785:41791	-0.055	0.01375	0.985508	0.00253829	0.0144916	0.00373255	0.0119533	0.00307041	-0.029561	0.0117796	intergenic	CRV2G00019355(dist=4886),CRV2G00019356(dist=13809)	CRV2G00019355	Protein of unknown function	0
scf_010:2103991	0.03029	0.008615	0.00190879	0.985384	0.0146156	0.00374564	0.0127068	0.00329135	0.0217942	0.00937273	intergenic	CRV2G00011325(dist=4601),CRV2G00011326(dist=20519)	CRV2G00011325	Protein of unknown function	GO:0000981;GO:0006355;GO:0005634;GO:0008270
unitig_601:21236	0.02875	0.00824	0.00186064	0.985279	0.0147212	0.00375883	0.0128606	0.00332546	0.0208246	0.00910182	intergenic	CRV2G00019330(dist=2135),CRV2G00019331(dist=10912)	CRV2G00019330	Protein of unknown function	0
unitig_823:320125	-0.0305	0.008677	0.985197	0.00194569	0.0148031	0.00377209	0.0128574	0.00331408	-0.0218911	0.0094119	upstream	CRV2G00015602(dist=962)	CRV2G00015602	Protein of unknown function	0
scf_003:2837832	0.03308	0.009299	0.00204812	0.985184	0.0148161	0.00378533	0.012768	0.00330268	0.0232436	0.00969202	exonic	CRV2G00007791	CRV2G00007791	Protein of unknown function	GO:0008168;GO:0008152
unitig_286:8109	0.05483	0.01375	0.00261359	0.985112	0.0148882	0.00379863	0.0122746	0.00317987	0.0294364	0.0117687	downstream	CRV2G00021563(dist=274)	CRV2G00021563	Protein of unknown function	0
unitig_105:196485	0.0275	0.00794	0.00184253	0.985028	0.0149724	0.003812	0.0131299	0.00334875	0.0199522	0.00881348	intergenic	CRV2G00018095(dist=5745),CRV2G00018096(dist=1910)	CRV2G00018095	Protein of unknown function	0
unitig_200:28530	0.05417	0.01364	0.00262626	0.984988	0.015012	0.00382538	0.0123857	0.003213	0.02924	0.0116313	intergenic	CRV2G00019727(dist=3017),CRV2G00019728(dist=2399)	CRV2G00019727	Protein of unknown function	0
unitig_200:28544	0.05417	0.01364	0.00262626	0.984988	0.015012	0.00383873	0.0123857	0.00322405	0.02924	0.0116313	intergenic	CRV2G00019727(dist=3031),CRV2G00019728(dist=2385)	CRV2G00019727	Protein of unknown function	0
unitig_821:264593	0.04218	0.01133	0.00237678	0.984935	0.0150649	0.00385211	0.0126881	0.00326879	0.0263455	0.010129	intergenic	CRV2G00007970(dist=50623),CRV2G00007971(dist=5879)	CRV2G00007970	Protein of unknown function	GO:0016758;GO:0005975;GO:0016020
unitig_105:244350	0.02902	0.00833	0.00193405	0.984859	0.0151406	0.00386555	0.0132065	0.00337208	0.0209465	0.00917346	intergenic	CRV2G00018099(dist=29864),CRV2G00018100(dist=1585)	CRV2G00018099	Similar to TIC32 Short-chain dehydrogenase TIC 32, chloroplastic (Arabidopsis thaliana)	GO:0008152;GO:0016491
scf_001:13099	0.03061	0.008724	0.00200508	0.984837	0.0151631	0.00387898	0.013158	0.0033604	0.0219052	0.00944349	intergenic	NONE(dist=NONE),CRV2G00003338(dist=7645)	CRV2G00003338	Protein of unknown function	0
scf_010:2107900	0.02762	0.007984	0.00188562	0.984765	0.015235	0.00389247	0.0133494	0.00339559	0.0200058	0.0088547	intergenic	CRV2G00011325(dist=8510),CRV2G00011326(dist=16610)	CRV2G00011325	Protein of unknown function	GO:0000981;GO:0006355;GO:0005634;GO:0008270
unitig_821:1833026	0.02725	0.007894	0.00187828	0.984698	0.0153016	0.003906	0.0134233	0.00341923	0.0197417	0.00875663	intergenic	CRV2G00008510(dist=1053),CRV2G00008511(dist=29919)	CRV2G00008510	Protein of unknown function	0
unitig_821:1833029	0.02725	0.007894	0.00187828	0.984698	0.0153016	0.0039195	0.0134233	0.00343102	0.0197417	0.00875663	intergenic	CRV2G00008510(dist=1056),CRV2G00008511(dist=29916)	CRV2G00008510	Protein of unknown function	0
unitig_785:52579	-0.0525	0.01336	0.984646	0.00266222	0.0153535	0.00393303	0.0126913	0.00328008	-0.0287545	0.0113177	intergenic	CRV2G00019355(dist=15674),CRV2G00019356(dist=3021)	CRV2G00019355	Protein of unknown function	0
unitig_245:2368	0.02597	0.007572	0.00182696	0.984639	0.0153605	0.00394654	0.0135336	0.00345472	0.0188197	0.00835915	intronic	CRV2G00021447	CRV2G00021447	Protein of unknown function	GO:0003676
unitig_105:232169	0.02394	0.007055	0.00173501	0.984601	0.0153995	0.00396006	0.0136645	0.00350229	0.0173239	0.0075678	intergenic	CRV2G00018099(dist=17683),CRV2G00018100(dist=13766)	CRV2G00018099	Similar to TIC32 Short-chain dehydrogenase TIC 32, chloroplastic (Arabidopsis thaliana)	GO:0008152;GO:0016491
unitig_189:4056	0.0248	0.007286	0.00180687	0.984376	0.0156239	0.00397382	0.013817	0.00356193	0.0179375	0.00793303	upstream	CRV2G00021913,CRV2G00021914(dist=447)	CRV2G00021913	Protein of unknown function	0
scf_003:2789886	0.02272	0.006756	0.00171488	0.984292	0.0157076	0.00398764	0.0139927	0.00357406	0.0164256	0.00703112	downstream	CRV2G00007770(dist=826)	CRV2G00007770	Protein of unknown function	GO:0046872
unitig_697:148616	0.04102	0.01113	0.00246304	0.984274	0.0157258	0.00400145	0.0132627	0.0033838	0.0259258	0.0101263	intergenic	CRV2G00018409(dist=30111),CRV2G00018410(dist=2446)	CRV2G00018409	Protein of unknown function	0
scf_001:3858879	0.04955	0.01284	0.00268912	0.984199	0.0158014	0.00401531	0.0131123	0.00333711	0.0279701	0.0108651	intergenic	CRV2G00004612(dist=19210),CRV2G00004613(dist=4581)	CRV2G00004612	Protein of unknown function	GO:0055085;GO:0016021
scf_003:2877046	0.03372	0.009507	0.00223131	0.984196	0.0158042	0.00402915	0.0135728	0.00346661	0.0233895	0.00979344	exonic	CRV2G00007804	CRV2G00007804	Protein of unknown function	0
scf_003:2877090	0.03372	0.009507	0.00223131	0.984196	0.0158042	0.00404295	0.0135728	0.00347847	0.0233895	0.00979344	exonic	CRV2G00007804	CRV2G00007804	Protein of unknown function	0
unitig_624:46523	0.03219	0.009143	0.00217033	0.984195	0.0158049	0.00405673	0.0136345	0.00349038	0.0226643	0.00966254	intergenic	CRV2G00019544(dist=1345),CRV2G00019545(dist=5209)	CRV2G00019544	Protein of unknown function	0
unitig_227:53572	-0.02683	0.00782	0.984056	0.00195023	0.0159442	0.00407063	0.0139939	0.00358616	-0.0193792	0.00865631	intergenic	CRV2G00019646(dist=2614),NONE(dist=NONE)	CRV2G00019646	Protein of unknown function	GO:0005576
unitig_643:81423	0.04184	0.01132	0.00253703	0.983993	0.0160069	0.00408458	0.0134699	0.00344285	0.0260981	0.010187	intergenic	CRV2G00019327(dist=22475),NONE(dist=NONE)	CRV2G00019327	Similar to betA Oxygen-dependent choline dehydrogenase (Burkholderia multivorans (strain ATCC 17616 / 249))	GO:0055114;GO:0050660;GO:0006066;GO:0016614;GO:0008812
unitig_154:123527	0.04722	0.01241	0.00268878	0.983926	0.0160743	0.00409857	0.0133855	0.0034074	0.0273852	0.0105984	upstream	CRV2G00018960(dist=745)	CRV2G00018960	Similar to STE23 A-factor-processing enzyme (Saccharomyces cerevisiae (strain ATCC 204508 / S288c))	GO:0003824;GO:0046872
unitig_152:928	-0.0205	0.006203	0.983813	0.00165972	0.0161869	0.00411265	0.0145272	0.00382989	-0.0149365	0.00602206	intergenic	NONE(dist=NONE),CRV2G00019467(dist=12779)	CRV2G00019467	Similar to NMRAL1 NmrA-like family domain-containing protein 1 (Gallus gallus)	0
unitig_723:41229	0.02378	0.007054	0.00184166	0.983735	0.0162653	0.0041268	0.0144237	0.00378123	0.0171424	0.00752794	exonic	CRV2G00016669	CRV2G00016669	Protein of unknown function	0
unitig_105:234950	-0.02727	0.007949	0.98371	0.00202143	0.0162904	0.00414095	0.014269	0.00365943	-0.0196507	0.00879598	intergenic	CRV2G00018099(dist=20464),CRV2G00018100(dist=10985)	CRV2G00018099	Similar to TIC32 Short-chain dehydrogenase TIC 32, chloroplastic (Arabidopsis thaliana)	GO:0008152;GO:0016491
scf_005:1933504	0.0265	0.007753	0.00198346	0.983709	0.0162912	0.00415506	0.0143078	0.00370825	0.0191112	0.00856545	downstream	CRV2G00002344(dist=870)	CRV2G00002344	Protein of unknown function	0
unitig_277:12381	-0.02665	0.007795	0.983632	0.00200188	0.0163679	0.00416923	0.0143661	0.00374476	-0.0192098	0.00861513	upstream;downstream	CRV2G00021492(dist=60);CRV2G00021491(dist=148)	CRV2G00021492	Protein of unknown function	GO:0003824
unitig_842:19087	0.022	0.006603	0.00177287	0.983546	0.0164543	0.00418346	0.0146815	0.00387871	0.0158836	0.00672303	exonic	CRV2G00020024	CRV2G00020024	Protein of unknown function	0
unitig_669:39460	-0.03023	0.008701	0.983524	0.00219005	0.0164759	0.00419769	0.0142859	0.00369607	-0.0215149	0.00944124	intergenic	CRV2G00019597(dist=5367),CRV2G00019598(dist=3555)	CRV2G00019597	Protein of unknown function	GO:0000981;GO:0006355;GO:0005634;GO:0008270
unitig_697:242814	0.02953	0.008529	0.00216268	0.983491	0.0165094	0.00421192	0.0143467	0.00373259	0.0210958	0.00932326	upstream;downstream	CRV2G00018430(dist=432);CRV2G00018429(dist=228)	CRV2G00018430	Protein of unknown function	GO:0003676;GO:0004523
unitig_145:12008	0.03033	0.008728	0.00220144	0.98348	0.0165199	0.00422613	0.0143185	0.00372042	0.0215669	0.00945864	intergenic	NONE(dist=NONE),NONE(dist=NONE)		#N/A	#N/A
unitig_41:231829	0.03369	0.00954	0.00234707	0.983479	0.016521	0.00424031	0.0141739	0.00362269	0.0232714	0.00982868	intergenic	CRV2G00016392(dist=25337),CRV2G00016393(dist=10570)	CRV2G00016392	Similar to ARB_01230 Kelch repeat-containing protein ARB_01230 (Arthroderma benhamiae (strain ATCC MYA-4681 / CBS 112371))	GO:0005515
unitig_643:94315	0.04794	0.01258	0.00279123	0.983478	0.0165225	0.00425446	0.0137313	0.00351425	0.0274739	0.0107155	intergenic	CRV2G00019327(dist=35367),NONE(dist=NONE)	CRV2G00019327	Similar to betA Oxygen-dependent choline dehydrogenase (Burkholderia multivorans (strain ATCC 17616 / 249))	GO:0055114;GO:0050660;GO:0006066;GO:0016614;GO:0008812
unitig_643:96379	0.04794	0.01258	0.00279123	0.983478	0.0165225	0.00426858	0.0137313	0.00352619	0.0274739	0.0107155	intergenic	CRV2G00019327(dist=37431),NONE(dist=NONE)	CRV2G00019327	Similar to betA Oxygen-dependent choline dehydrogenase (Burkholderia multivorans (strain ATCC 17616 / 249))	GO:0055114;GO:0050660;GO:0006066;GO:0016614;GO:0008812
unitig_643:96440	0.04794	0.01258	0.00279123	0.983478	0.0165225	0.00428267	0.0137313	0.0035381	0.0274739	0.0107155	intergenic	CRV2G00019327(dist=37492),NONE(dist=NONE)	CRV2G00019327	Similar to betA Oxygen-dependent choline dehydrogenase (Burkholderia multivorans (strain ATCC 17616 / 249))	GO:0055114;GO:0050660;GO:0006066;GO:0016614;GO:0008812
unitig_643:96815	0.04794	0.01258	0.00279123	0.983478	0.0165225	0.00429672	0.0137313	0.00354998	0.0274739	0.0107155	intergenic	CRV2G00019327(dist=37867),NONE(dist=NONE)	CRV2G00019327	Similar to betA Oxygen-dependent choline dehydrogenase (Burkholderia multivorans (strain ATCC 17616 / 249))	GO:0055114;GO:0050660;GO:0006066;GO:0016614;GO:0008812
unitig_105:84842	0.03275	0.009317	0.00230938	0.983471	0.0165286	0.00431075	0.0142193	0.00363494	0.0228371	0.009751	intergenic	CRV2G00018065(dist=8356),CRV2G00018066(dist=1447)	CRV2G00018065	Protein of unknown function	0
unitig_793:505440	0.0391	0.01077	0.00255373	0.98343	0.0165703	0.00432479	0.0140166	0.00359826	0.0252395	0.0101063	intergenic	CRV2G00016659(dist=28587),NONE(dist=NONE)	CRV2G00016659	Protein of unknown function	GO:0005515
unitig_41:120180	0.03371	0.009549	0.00236063	0.983401	0.0165987	0.00433883	0.0142381	0.00364718	0.0232691	0.00983416	intergenic	CRV2G00016364(dist=14335),CRV2G00016365(dist=4764)	CRV2G00016364	Protein of unknown function	0
scf_001:3910318	-0.02557	0.00753	0.983395	0.00198052	0.0166053	0.00435285	0.0146248	0.00385426	-0.018415	0.00825851	downstream	CRV2G00004623(dist=153)	CRV2G00004623	Protein of unknown function	0
unitig_152:40623	0.03952	0.01087	0.00259358	0.983282	0.0167179	0.00436697	0.0141243	0.00361046	0.0253412	0.0101339	upstream	CRV2G00019476,CRV2G00019477(dist=828)	CRV2G00019476	Protein of unknown function	GO:0005515
scf_014:978020	-0.03529	0.009925	0.983271	0.00244506	0.0167289	0.00438106	0.0142839	0.00367167	-0.0239085	0.00994347	intergenic	CRV2G00012293(dist=10017),CRV2G00012294(dist=20473)	CRV2G00012293	Protein of unknown function	GO:0005975;GO:0003824
scf_014:978047	-0.03529	0.009925	0.983271	0.00244506	0.0167289	0.00439513	0.0142839	0.00368388	-0.0239085	0.00994347	intergenic	CRV2G00012293(dist=10044),CRV2G00012294(dist=20446)	CRV2G00012293	Protein of unknown function	GO:0005975;GO:0003824
scf_005:4701048	0.0326	0.009292	0.0023357	0.983269	0.0167314	0.00440916	0.0143957	0.00375693	0.0227368	0.00974654	intergenic	CRV2G00003316(dist=5785),CRV2G00003317(dist=31337)	CRV2G00003316	Similar to MexAM1_META1p0182 Uncharacterized oxidoreductase MexAM1_META1p0182 (Methylobacterium extorquens (strain ATCC 14718 / DSM 1338 / JCM 2805 / NCIMB 9133 / AM1))	GO:0008152;GO:0016491
unitig_593:8261	-0.0135	0.004306	0.983125	0.00129343	0.0168755	0.00442333	0.015582	0.00422117	-0.0113519	0.00384423	intergenic	CRV2G00021415(dist=6059),CRV2G00021416(dist=4024)	CRV2G00021415	Protein of unknown function	GO:0005515
unitig_207:10502	-0.0226	0.006779	0.98306	0.00186753	0.0169396	0.00443753	0.015072	0.00404907	-0.0162622	0.00701884	intergenic	NONE(dist=NONE),NONE(dist=NONE)		#N/A	#N/A
unitig_41:61735	0.03067	0.008834	0.00228358	0.983053	0.0169473	0.00445172	0.0146637	0.00386649	0.0217052	0.00952669	intergenic	CRV2G00016356(dist=28731),CRV2G00016357(dist=4607)	CRV2G00016356	Protein of unknown function	0
unitig_821:1875073	0.03783	0.01052	0.00259887	0.982924	0.0170756	0.00446601	0.0144768	0.00379342	0.0247631	0.0100863	intergenic	CRV2G00008512(dist=8208),CRV2G00008513(dist=18041)	CRV2G00008512	Similar to CHS8 Chitin synthase 8 (Ustilago maydis (strain 521 / FGSC 9021))	GO:0016758
unitig_697:156762	-0.03344	0.009514	0.982868	0.00243683	0.0171318	0.00448034	0.014695	0.00389092	-0.0230729	0.00983958	intergenic	CRV2G00018410(dist=4477),CRV2G00018412(dist=14359)	CRV2G00018410	Protein of unknown function	0
unitig_284:7171	-0.0314	0.009024	0.982841	0.00235072	0.0171589	0.00449467	0.0148081	0.00400012	-0.0220739	0.00963386	upstream;downstream	CRV2G00020536(dist=213);CRV2G00020537(dist=213)	CRV2G00020536	Protein of unknown function	0
unitig_658:730237	0.0424	0.01152	0.00279946	0.982644	0.0173561	0.00450918	0.0145567	0.00384205	0.0260242	0.010318	intergenic	CRV2G00014353(dist=3337),NONE(dist=NONE)	CRV2G00014353	Protein of unknown function	0
unitig_41:289207	0.04807	0.01266	0.00295553	0.98264	0.0173601	0.00452367	0.0144046	0.00376909	0.0273631	0.0107965	intergenic	CRV2G00016400(dist=5630),CRV2G00016401(dist=12144)	CRV2G00016400	Protein of unknown function	0
unitig_440:6692	0.01175	0.003785	0.00119462	0.982571	0.0174291	0.00453821	0.0162345	0.00451997	0.010407	0.00348206	exonic	CRV2G00021365	CRV2G00021365	Protein of unknown function	0
unitig_280:14803	-0.02217	0.006692	0.982474	0.00191941	0.0175257	0.00455282	0.0156063	0.00423363	-0.0159338	0.00683953	intergenic	NONE(dist=NONE),NONE(dist=NONE)		#N/A	#N/A
unitig_171:165185	0.03581	0.01009	0.00260425	0.982452	0.0175479	0.00456742	0.0149436	0.00402452	0.0239873	0.0100177	intergenic	CRV2G00015307(dist=2213),CRV2G00015308(dist=15086)	CRV2G00015307	Protein of unknown function	0
unitig_818:284215	0.04073	0.01118	0.00278461	0.982437	0.0175626	0.004582	0.014778	0.00396378	0.0255519	0.0102461	intergenic	CRV2G00017649(dist=1554),CRV2G00017650(dist=3884)	CRV2G00017649	Protein of unknown function	0
unitig_743:124341	0.0325	0.009313	0.00246944	0.982415	0.0175847	0.00459658	0.0151153	0.00406137	0.0225727	0.00977555	exonic	CRV2G00019117	CRV2G00019117	Similar to RF_0381 Putative ankyrin repeat protein RF_0381 (Rickettsia felis (strain ATCC VR-1525 / URRWXCal2))	GO:0009116;GO:0005515;GO:0003824
unitig_743:124542	0.0325	0.009313	0.00246944	0.982415	0.0175847	0.00461112	0.0151153	0.00407364	0.0225727	0.00977555	exonic	CRV2G00019117	CRV2G00019117	Similar to RF_0381 Putative ankyrin repeat protein RF_0381 (Rickettsia felis (strain ATCC VR-1525 / URRWXCal2))	GO:0009116;GO:0005515;GO:0003824
unitig_743:124547	0.0325	0.009313	0.00246944	0.982415	0.0175847	0.00462563	0.0151153	0.00408588	0.0225727	0.00977555	exonic	CRV2G00019117	CRV2G00019117	Similar to RF_0381 Putative ankyrin repeat protein RF_0381 (Rickettsia felis (strain ATCC VR-1525 / URRWXCal2))	GO:0009116;GO:0005515;GO:0003824
unitig_171:175571	0.04142	0.01133	0.00281743	0.98238	0.0176204	0.00464015	0.014803	0.00397592	0.0257287	0.0102842	intergenic	CRV2G00015307(dist=12599),CRV2G00015308(dist=4700)	CRV2G00015307	Protein of unknown function	0
unitig_171:175637	0.04142	0.01133	0.00281743	0.98238	0.0176204	0.00465464	0.014803	0.00398803	0.0257287	0.0102842	intergenic	CRV2G00015307(dist=12665),CRV2G00015308(dist=4634)	CRV2G00015307	Protein of unknown function	0
scf_022:2338006	0.03962	0.01095	0.00277518	0.982283	0.0177171	0.0046692	0.0149419	0.00401233	0.0252152	0.0102053	intergenic	CRV2G00005444(dist=48924),CRV2G00005445(dist=5547)	CRV2G00005444	Protein of unknown function	0
unitig_270:4649	-0.0135	0.00433	0.982272	0.00137181	0.0177282	0.00468375	0.0163564	0.0045576	-0.0113281	0.00387047	intergenic	NONE(dist=NONE),NONE(dist=NONE)		#N/A	#N/A
unitig_73:26266	0.04846	0.01276	0.00303897	0.98226	0.0177404	0.00469827	0.0147014	0.00390311	0.0273893	0.0108725	intergenic	CRV2G00018189(dist=3799),CRV2G00018190(dist=7758)	CRV2G00018189	Protein of unknown function	0
unitig_73:26277	0.04846	0.01276	0.00303897	0.98226	0.0177404	0.00471276	0.0147014	0.00391527	0.0273893	0.0108725	intergenic	CRV2G00018189(dist=3810),CRV2G00018190(dist=7747)	CRV2G00018189	Protein of unknown function	0
unitig_281:1992	0.03717	0.01041	0.00269113	0.982256	0.0177443	0.00472722	0.0150532	0.0040368	0.0244431	0.0100972	intergenic	NONE(dist=NONE),CRV2G00019685(dist=2913)	CRV2G00019685	Protein of unknown function	0
unitig_224:15981	0.0165	0.005196	0.00160914	0.982148	0.0178518	0.00474177	0.0162427	0.00453247	0.012752	0.00460152	exonic	CRV2G00020682	CRV2G00020682	Protein of unknown function	0
unitig_196:17828	0.06444	0.01566	0.00339996	0.982108	0.0178925	0.00475634	0.0144925	0.00380559	0.0316218	0.0144712	downstream	CRV2G00019378(dist=56)	CRV2G00019378	Protein of unknown function	0
unitig_196:17927	0.06444	0.01566	0.00339996	0.982108	0.0178925	0.00477087	0.0144925	0.00381773	0.0316218	0.0144712	intronic	CRV2G00019378	CRV2G00019378	Protein of unknown function	0
unitig_105:143149	0.03443	0.00979	0.00261127	0.982074	0.0179265	0.00478541	0.0153152	0.00417157	0.0233896	0.00995289	intergenic	CRV2G00018084(dist=2464),CRV2G00018085(dist=14108)	CRV2G00018084	Protein of unknown function	GO:0004601
unitig_105:143155	0.03443	0.00979	0.00261127	0.982074	0.0179265	0.00479991	0.0153152	0.00418381	0.0233896	0.00995289	intergenic	CRV2G00018084(dist=2470),CRV2G00018085(dist=14102)	CRV2G00018084	Protein of unknown function	GO:0004601
unitig_595:19634	-0.02968	0.008642	0.981979	0.00240237	0.018021	0.00481449	0.0156186	0.00424607	-0.0210067	0.00940538	upstream;downstream	CRV2G00019124(dist=118);CRV2G00019122,CRV2G00019123(dist=118)	CRV2G00019124	Protein of unknown function	GO:0008152;GO:0016846
unitig_595:19644	-0.02968	0.008642	0.981979	0.00240237	0.018021	0.00482903	0.0156186	0.00425848	-0.0210067	0.00940538	upstream;downstream	CRV2G00019124(dist=108);CRV2G00019122,CRV2G00019123(dist=108)	CRV2G00019124	Protein of unknown function	GO:0008152;GO:0016846
unitig_595:19660	-0.02968	0.008642	0.981979	0.00240237	0.018021	0.00484354	0.0156186	0.00427087	-0.0210067	0.00940538	upstream;downstream	CRV2G00019124(dist=92);CRV2G00019122,CRV2G00019123(dist=92)	CRV2G00019124	Protein of unknown function	GO:0008152;GO:0016846
unitig_595:19771	-0.02968	0.008642	0.981979	0.00240237	0.018021	0.00485802	0.0156186	0.00428323	-0.0210067	0.00940538	exonic	CRV2G00019123	CRV2G00019123	Protein of unknown function	GO:0008168;GO:0008152
unitig_595:19796	-0.02968	0.008642	0.981979	0.00240237	0.018021	0.00487247	0.0156186	0.00429557	-0.0210067	0.00940538	exonic	CRV2G00019123	CRV2G00019123	Protein of unknown function	GO:0008168;GO:0008152
unitig_595:20445	-0.02968	0.008642	0.981979	0.00240237	0.018021	0.00488689	0.0156186	0.00430788	-0.0210067	0.00940538	upstream	CRV2G00019123,CRV2G00019124(dist=77)	CRV2G00019123	Protein of unknown function	GO:0008168;GO:0008152
unitig_595:20450	-0.02968	0.008642	0.981979	0.00240237	0.018021	0.00490128	0.0156186	0.00432016	-0.0210067	0.00940538	upstream	CRV2G00019123,CRV2G00019124(dist=72)	CRV2G00019123	Protein of unknown function	GO:0008168;GO:0008152
unitig_595:20529	-0.02968	0.008642	0.981979	0.00240237	0.018021	0.00491563	0.0156186	0.00433241	-0.0210067	0.00940538	UTR5	CRV2G00019124(CRV2T00019124_1:c.-115C>A)	CRV2G00019124	Protein of unknown function	GO:0008152;GO:0016846
scf_003:434705	0.0578	0.01451	0.00330326	0.981977	0.0180225	0.00492996	0.0147193	0.00392742	0.0296257	0.0126642	intergenic	CRV2G00007051(dist=38940),CRV2G00007052(dist=25575)	CRV2G00007051	Protein of unknown function	0
scf_003:434715	0.0578	0.01451	0.00330326	0.981977	0.0180225	0.00494425	0.0147193	0.00393954	0.0296257	0.0126642	intergenic	CRV2G00007051(dist=38950),CRV2G00007052(dist=25565)	CRV2G00007051	Protein of unknown function	0
scf_003:434762	0.0578	0.01451	0.00330326	0.981977	0.0180225	0.00495851	0.0147193	0.00395164	0.0296257	0.0126642	intergenic	CRV2G00007051(dist=38997),CRV2G00007052(dist=25518)	CRV2G00007051	Protein of unknown function	0
unitig_659:103450	0.02703	0.007971	0.00226302	0.981967	0.0180328	0.00497275	0.0157698	0.0043571	0.0193121	0.00878243	intergenic	CRV2G00019300(dist=2486),NONE(dist=NONE)	CRV2G00019300	Similar to HET-E1 Vegetative incompatibility protein HET-E-1 (Podospora anserina)	GO:0005515
unitig_19:9614	0.02375	0.007132	0.00210363	0.981774	0.018226	0.00498717	0.0161224	0.00445722	0.0169818	0.00757827	intergenic	CRV2G00021946(dist=8728),CRV2G00021947(dist=2775)	CRV2G00021946	Protein of unknown function	0
unitig_659:56104	0.04531	0.01217	0.00305321	0.981747	0.0182529	0.00500159	0.0151997	0.00411044	0.0265868	0.0105858	upstream	CRV2G00019292(dist=667)	CRV2G00019292	Similar to chit42 Endochitinase 42 (Trichoderma harzianum)	GO:0004568;GO:0004553;GO:0005975;GO:0003824;GO:0006032
unitig_659:56760	0.04531	0.01217	0.00305321	0.981747	0.0182529	0.00501598	0.0151997	0.0041227	0.0265868	0.0105858	intergenic	CRV2G00019292(dist=1323),CRV2G00019293(dist=6180)	CRV2G00019292	Similar to chit42 Endochitinase 42 (Trichoderma harzianum)	GO:0004568;GO:0004553;GO:0005975;GO:0003824;GO:0006032
unitig_659:57206	0.04531	0.01217	0.00305321	0.981747	0.0182529	0.00503034	0.0151997	0.00413492	0.0265868	0.0105858	intergenic	CRV2G00019292(dist=1769),CRV2G00019293(dist=5734)	CRV2G00019292	Similar to chit42 Endochitinase 42 (Trichoderma harzianum)	GO:0004568;GO:0004553;GO:0005975;GO:0003824;GO:0006032
unitig_659:57584	0.04531	0.01217	0.00305321	0.981747	0.0182529	0.00504466	0.0151997	0.00414712	0.0265868	0.0105858	intergenic	CRV2G00019292(dist=2147),CRV2G00019293(dist=5356)	CRV2G00019292	Similar to chit42 Endochitinase 42 (Trichoderma harzianum)	GO:0004568;GO:0004553;GO:0005975;GO:0003824;GO:0006032
unitig_659:57779	0.04531	0.01217	0.00305321	0.981747	0.0182529	0.00505896	0.0151997	0.0041593	0.0265868	0.0105858	intergenic	CRV2G00019292(dist=2342),CRV2G00019293(dist=5161)	CRV2G00019292	Similar to chit42 Endochitinase 42 (Trichoderma harzianum)	GO:0004568;GO:0004553;GO:0005975;GO:0003824;GO:0006032
unitig_1:442082	-0.02338	0.00704	0.981672	0.00209558	0.0183275	0.0050733	0.0162319	0.00448234	-0.0167149	0.00741864	intergenic	CRV2G00013600(dist=12800),CRV2G00013601(dist=27803)	CRV2G00013600	Similar to paxP Cytochrome P450 monooxygenase paxP (Penicillium paxilli)	GO:0016705;GO:0055114;GO:0020037;GO:0004497;GO:0005506
unitig_1:442088	-0.02338	0.00704	0.981672	0.00209558	0.0183275	0.00508762	0.0162319	0.00449491	-0.0167149	0.00741864	intergenic	CRV2G00013600(dist=12806),CRV2G00013601(dist=27797)	CRV2G00013600	Similar to paxP Cytochrome P450 monooxygenase paxP (Penicillium paxilli)	GO:0016705;GO:0055114;GO:0020037;GO:0004497;GO:0005506
unitig_624:65763	-0.04919	0.01294	0.981643	0.00317797	0.0183571	0.00510193	0.0151792	0.00409816	-0.0274545	0.0110117	intergenic	CRV2G00019545(dist=13658),NONE(dist=NONE)	CRV2G00019545	Protein of unknown function	GO:0005515
unitig_511:11949	0.022	0.006683	0.0020225	0.981601	0.0183986	0.00511626	0.0163761	0.00457016	0.0157702	0.00678989	intergenic	NONE(dist=NONE),NONE(dist=NONE)		#N/A	#N/A
unitig_403:7071	-0.03633	0.01026	0.981509	0.00278765	0.0184906	0.00513066	0.015703	0.00434473	-0.024042	0.0100972	intergenic	CRV2G00021587(dist=1445),CRV2G00021588(dist=1455)	CRV2G00021587	#N/A	#N/A
unitig_821:2445748	0.02627	0.007798	0.00229233	0.981474	0.0185263	0.00514506	0.016234	0.00450745	0.0187428	0.00855992	intergenic	CRV2G00008685(dist=7689),CRV2G00008686(dist=2761)	CRV2G00008685	Protein of unknown function	GO:0005515
unitig_749:110030	0.02829	0.008317	0.002411	0.981441	0.0185589	0.00515947	0.0161479	0.00446975	0.0200927	0.00913294	exonic	CRV2G00019281	CRV2G00019281	Similar to Alcohol dehydrogenase (Geobacillus stearothermophilus)	GO:0055114;GO:0016747;GO:0008270;GO:0016491
unitig_697:241810	0.02954	0.008634	0.00248253	0.981416	0.0185837	0.00517387	0.0161012	0.00443214	0.0208598	0.00939889	exonic	CRV2G00018429	CRV2G00018429	Protein of unknown function	0
unitig_595:17720	-0.0335	0.009612	0.98126	0.00270586	0.0187396	0.00518841	0.0160337	0.00440707	-0.0228812	0.00991948	upstream	CRV2G00019121,CRV2G00019122(dist=92)	CRV2G00019121	Similar to Wwox WW domain-containing oxidoreductase (Mus musculus)	GO:0008152;GO:0016491
unitig_595:17732	-0.0335	0.009612	0.98126	0.00270586	0.0187396	0.00520292	0.0160337	0.00441958	-0.0228812	0.00991948	upstream	CRV2G00019121,CRV2G00019122(dist=80)	CRV2G00019121	Similar to Wwox WW domain-containing oxidoreductase (Mus musculus)	GO:0008152;GO:0016491
unitig_821:1889409	0.02658	0.007891	0.00235312	0.98118	0.01882	0.00521748	0.0164669	0.00460787	0.018931	0.00866865	intergenic	CRV2G00008512(dist=22544),CRV2G00008513(dist=3705)	CRV2G00008512	Similar to CHS8 Chitin synthase 8 (Ustilago maydis (strain 521 / FGSC 9021))	GO:0016758
unitig_821:1889431	0.02658	0.007891	0.00235312	0.98118	0.01882	0.00523202	0.0164669	0.00462042	0.018931	0.00866865	intergenic	CRV2G00008512(dist=22566),CRV2G00008513(dist=3683)	CRV2G00008512	Similar to CHS8 Chitin synthase 8 (Ustilago maydis (strain 521 / FGSC 9021))	GO:0016758
scf_001:3843067	-0.0343	0.009809	0.981118	0.00276669	0.0188816	0.00524658	0.0161149	0.00444469	-0.0232049	0.00998965	intergenic	CRV2G00004612(dist=3398),CRV2G00004613(dist=20393)	CRV2G00004612	Protein of unknown function	GO:0055085;GO:0016021
unitig_171:175621	0.04188	0.01151	0.00309779	0.980941	0.0190588	0.00526131	0.0159611	0.00439452	0.0256295	0.0104062	intergenic	CRV2G00015307(dist=12649),CRV2G00015308(dist=4650)	CRV2G00015307	Protein of unknown function	0
unitig_281:1885	0.02533	0.007582	0.00232708	0.980847	0.0191526	0.0052761	0.0168256	0.00477143	0.0180321	0.0082471	intergenic	NONE(dist=NONE),CRV2G00019685(dist=3020)	CRV2G00019685	Protein of unknown function	0
unitig_196:73610	0.06275	0.01546	0.00364403	0.980818	0.0191815	0.0052909	0.0155375	0.00419628	0.0308187	0.0140223	exonic	CRV2G00019392	CRV2G00019392	Similar to pnbA Para-nitrobenzyl esterase (Bacillus subtilis (strain 168))	GO:0004104
unitig_196:73662	0.06275	0.01546	0.00364403	0.980818	0.0191815	0.00530566	0.0155375	0.00420871	0.0308187	0.0140223	exonic	CRV2G00019392	CRV2G00019392	Similar to pnbA Para-nitrobenzyl esterase (Bacillus subtilis (strain 168))	GO:0004104
unitig_609:5485	0.03167	0.009197	0.00270837	0.980701	0.0192993	0.00532051	0.0165909	0.00468323	0.0219441	0.00975283	intergenic	NONE(dist=NONE),NONE(dist=NONE)		#N/A	#N/A
unitig_280:14772	-0.0195	0.006062	0.980585	0.00199143	0.0194147	0.00533546	0.0174232	0.00484902	-0.0142019	0.00570448	intergenic	NONE(dist=NONE),NONE(dist=NONE)		#N/A	#N/A
unitig_280:14781	-0.0195	0.006062	0.980585	0.00199143	0.0194147	0.00535037	0.0174232	0.00486206	-0.0142019	0.00570448	intergenic	NONE(dist=NONE),NONE(dist=NONE)		#N/A	#N/A
unitig_41:121279	0.03212	0.009314	0.00275514	0.980556	0.0194436	0.00536529	0.0166885	0.00472087	0.0221499	0.00981212	intergenic	CRV2G00016364(dist=15434),CRV2G00016365(dist=3665)	CRV2G00016364	Protein of unknown function	0
scf_014:1044415	0.0352	0.01005	0.00290823	0.98053	0.0194697	0.0053802	0.0165615	0.00464554	0.0234861	0.0100802	upstream	CRV2G00012309,CRV2G00012310(dist=65)	CRV2G00012309	Similar to DDB_G0271550 Probable myosin light chain kinase DDB_G0271550 (Dictyostelium discoideum)	GO:0005515;GO:0016772;GO:0005524;GO:0004674;GO:0006468;GO:0004672
scf_010:2114462	0.04031	0.0112	0.00312714	0.980481	0.0195193	0.00539513	0.0163921	0.00458271	0.0251429	0.0103521	intergenic	CRV2G00011325(dist=15072),CRV2G00011326(dist=10048)	CRV2G00011325	Protein of unknown function	GO:0000981;GO:0006355;GO:0005634;GO:0008270
scf_014:1006176	-0.06183	0.01533	0.980376	0.00372038	0.0196236	0.00541013	0.0159032	0.00436958	-0.0304561	0.013782	intergenic	CRV2G00012294(dist=7293),CRV2G00012295(dist=6474)	CRV2G00012294	Protein of unknown function	0
scf_014:1006184	-0.06183	0.01533	0.980376	0.00372038	0.0196236	0.00542511	0.0159032	0.00438203	-0.0304561	0.013782	intergenic	CRV2G00012294(dist=7301),CRV2G00012295(dist=6466)	CRV2G00012294	Protein of unknown function	0
unitig_105:233015	0.0451	0.01221	0.00331529	0.980346	0.0196539	0.00544009	0.0163386	0.00454504	0.0263228	0.0106666	intergenic	CRV2G00018099(dist=18529),CRV2G00018100(dist=12920)	CRV2G00018099	Similar to TIC32 Short-chain dehydrogenase TIC 32, chloroplastic (Arabidopsis thaliana)	GO:0008152;GO:0016491
unitig_659:71375	0.04257	0.01169	0.00323786	0.980319	0.0196814	0.00545506	0.0164435	0.00459529	0.0257122	0.0104874	upstream	CRV2G00019295(dist=241)	CRV2G00019295	Similar to chs-1 Chitin synthase 1 (Neurospora crassa (strain ATCC 24698 / 74-OR23-1A / CBS 708.71 / DSM 1257 / FGSC 987))	GO:0006031;GO:0004100
unitig_785:9396	0.04038	0.01123	0.00318032	0.980206	0.019794	0.00547013	0.0166137	0.00469577	0.0251225	0.0103724	intergenic	NONE(dist=NONE),CRV2G00019352(dist=13853)	CRV2G00019352	Protein of unknown function	0
scf_003:447467	0.03586	0.01022	0.00299553	0.980199	0.0198005	0.00548516	0.016805	0.00473354	0.02369	0.0101379	intergenic	CRV2G00007051(dist=51702),CRV2G00007052(dist=12813)	CRV2G00007051	Protein of unknown function	0
scf_001:3872529	0.02533	0.007616	0.00244302	0.98004	0.0199599	0.00550034	0.0175169	0.00488823	0.0179692	0.00826996	intergenic	CRV2G00004613(dist=5273),CRV2G00004614(dist=2748)	CRV2G00004613	Protein of unknown function	0
unitig_643:96011	0.053	0.01377	0.0036225	0.979904	0.0200957	0.00551562	0.0164732	0.00463295	0.0280514	0.0117341	intergenic	CRV2G00019327(dist=37063),NONE(dist=NONE)	CRV2G00019327	Similar to betA Oxygen-dependent choline dehydrogenase (Burkholderia multivorans (strain ATCC 17616 / 249))	GO:0055114;GO:0050660;GO:0006066;GO:0016614;GO:0008812
scf_001:12508	0.03033	0.008905	0.0027731	0.979854	0.0201465	0.00553092	0.0173734	0.00483595	0.0211367	0.00959021	intergenic	NONE(dist=NONE),CRV2G00003338(dist=8236)	CRV2G00003338	Protein of unknown function	0
scf_003:3162824	0.04991	0.01319	0.00355913	0.979819	0.0201809	0.00554623	0.0166217	0.0047083	0.0273284	0.011236	intergenic	CRV2G00007904(dist=10113),NONE(dist=NONE)	CRV2G00007904	Protein of unknown function	0
unitig_595:92516	0.02864	0.008487	0.00270568	0.979656	0.0203437	0.00556168	0.017638	0.00490142	0.0201298	0.00926832	upstream	CRV2G00019145(dist=607)	CRV2G00019145	Protein of unknown function	0
scf_001:9274	0.02851	0.008455	0.00270196	0.97963	0.0203701	0.00557712	0.0176681	0.00491461	0.0200471	0.00923937	intergenic	NONE(dist=NONE),CRV2G00003338(dist=11470)	CRV2G00003338	Protein of unknown function	0
unitig_105:89648	0.03327	0.009642	0.00298598	0.979528	0.020472	0.00559264	0.017486	0.00487514	0.0225574	0.00997248	exonic	CRV2G00018067	CRV2G00018067	Similar to FMP42 Protein FMP42 (Saccharomyces cerevisiae (strain ATCC 204508 / S288c))	0
unitig_624:46382	0.03662	0.01043	0.0031527	0.979502	0.0204981	0.00560815	0.0173454	0.0048229	0.0238669	0.0102171	intergenic	CRV2G00019544(dist=1204),CRV2G00019545(dist=5350)	CRV2G00019544	Protein of unknown function	0
unitig_595:35825	0.06638	0.01618	0.00402017	0.979407	0.0205933	0.00562372	0.0165731	0.00465812	0.0316323	0.0150505	exonic	CRV2G00019128	CRV2G00019128	Protein of unknown function	GO:0006355;GO:0000981;GO:0005634;GO:0008270
unitig_595:35837	0.06638	0.01618	0.00402017	0.979407	0.0205933	0.00563927	0.0165731	0.00467068	0.0316323	0.0150505	exonic	CRV2G00019128	CRV2G00019128	Protein of unknown function	GO:0006355;GO:0000981;GO:0005634;GO:0008270
unitig_821:1864606	-0.04811	0.01287	0.97931	0.00360953	0.0206898	0.00565488	0.0170803	0.00479695	-0.0268483	0.0110361	upstream;downstream	CRV2G00008511(dist=638);CRV2G00008512(dist=301)	CRV2G00008511	Similar to hexa1 Beta-hexosaminidase subunit A1 (Dictyostelium discoideum)	GO:0004563;GO:0004553;GO:0005975;GO:0003824
unitig_624:25943	-0.05592	0.01435	0.979234	0.00383248	0.0207661	0.00567054	0.0169336	0.00478413	-0.0286488	0.012361	intergenic	NONE(dist=NONE),CRV2G00019544(dist=18804)	CRV2G00019544	Protein of unknown function	0
scf_003:147051	0.061	0.01526	0.00394856	0.97923	0.0207702	0.00568617	0.0168216	0.00474619	0.0299966	0.0135949	exonic	CRV2G00006984	CRV2G00006984	Similar to OLE1 Acyl-CoA desaturase (Ajellomyces capsulatus)	GO:0005783;GO:0016717;GO:0004768;GO:0006629;GO:0055114;GO:0006633;GO:0020037;GO:0016020;GO:0005506
scf_003:147075	0.061	0.01526	0.00394856	0.97923	0.0207702	0.00570177	0.0168216	0.00475883	0.0299966	0.0135949	exonic	CRV2G00006984	CRV2G00006984	Similar to OLE1 Acyl-CoA desaturase (Ajellomyces capsulatus)	GO:0005783;GO:0016717;GO:0004768;GO:0006629;GO:0055114;GO:0006633;GO:0020037;GO:0016020;GO:0005506
unitig_1:92547	0.01725	0.005496	0.00198838	0.979226	0.0207741	0.00571734	0.0187857	0.00517341	0.0130002	0.00492161	exonic	CRV2G00013464	CRV2G00013464	Protein of unknown function	0
scf_014:1004057	0.04722	0.0127	0.00360243	0.979211	0.0207894	0.00573289	0.017187	0.00480986	0.0266349	0.0109427	intergenic	CRV2G00012294(dist=5174),CRV2G00012295(dist=8593)	CRV2G00012294	Protein of unknown function	0
unitig_823:320270	0.03256	0.009489	0.00301588	0.979128	0.020872	0.0057485	0.0178561	0.00492796	0.022186	0.00991608	upstream	CRV2G00015602(dist=817)	CRV2G00015602	Protein of unknown function	0
unitig_105:175840	0.03349	0.009722	0.0030947	0.978956	0.0210438	0.00576425	0.0179491	0.00494138	0.0225832	0.010016	intergenic	CRV2G00018091(dist=1223),CRV2G00018092(dist=4794)	CRV2G00018091	Similar to cfp Pyruvate decarboxylase (Neurospora crassa (strain ATCC 24698 / 74-OR23-1A / CBS 708.71 / DSM 1257 / FGSC 987))	GO:0030976;GO:0003824;GO:0000287
unitig_281:47541	0.01867	0.005897	0.00214223	0.978853	0.0211468	0.00578008	0.0190046	0.00525652	0.0136871	0.00543053	exonic	CRV2G00019696	CRV2G00019696	Protein of unknown function	0
unitig_170:18934	0.02845	0.008478	0.00283591	0.978747	0.0212526	0.00579598	0.0184167	0.00506348	0.0199237	0.00925072	upstream	CRV2G00019607,CRV2G00019608(dist=559)	CRV2G00019607	Protein of unknown function	GO:0016772
unitig_595:19317	-0.03325	0.009674	0.978747	0.00311764	0.0212531	0.00581185	0.0181355	0.00495497	-0.0224527	0.0100016	UTR3	CRV2G00019122(CRV2T00019122_1:c.*216A>G)	CRV2G00019122	Protein of unknown function	0
unitig_595:19327	-0.03325	0.009674	0.978747	0.00311764	0.0212531	0.00582769	0.0181355	0.00496853	-0.0224527	0.0100016	UTR3	CRV2G00019122(CRV2T00019122_1:c.*226C>T)	CRV2G00019122	Protein of unknown function	0
unitig_595:19495	-0.03325	0.009674	0.978747	0.00311764	0.0212531	0.00584349	0.0181355	0.00498207	-0.0224527	0.0100016	downstream	CRV2G00019122,CRV2G00019123(dist=257)	CRV2G00019122	Protein of unknown function	0
unitig_595:19509	-0.03325	0.009674	0.978747	0.00311764	0.0212531	0.00585927	0.0181355	0.00499557	-0.0224527	0.0100016	downstream	CRV2G00019122,CRV2G00019123(dist=243)	CRV2G00019122	Protein of unknown function	0
unitig_623:7293	0.0295	0.008746	0.00290295	0.978738	0.0212622	0.00587501	0.0183592	0.00503616	0.0205484	0.00947631	intergenic	NONE(dist=NONE),NONE(dist=NONE)		#N/A	#N/A
unitig_659:11743	0.03432	0.009934	0.00318784	0.978667	0.0213331	0.0058908	0.0181453	0.00502251	0.0228959	0.0100995	exonic	CRV2G00019284	CRV2G00019284	Similar to Kinesin light chain (Doryteuthis pealeii)	GO:0005515
unitig_595:20866	-0.02845	0.008484	0.978607	0.0028579	0.0213929	0.00590662	0.018535	0.00510453	-0.0199102	0.00925466	exonic	CRV2G00019124	CRV2G00019124	Protein of unknown function	GO:0008152;GO:0016846
unitig_595:20896	-0.02845	0.008484	0.978607	0.0028579	0.0213929	0.00592241	0.018535	0.00511819	-0.0199102	0.00925466	exonic	CRV2G00019124	CRV2G00019124	Protein of unknown function	GO:0008152;GO:0016846
unitig_170:24567	0.02712	0.008148	0.00279711	0.97844	0.0215602	0.00593833	0.0187631	0.00514577	0.0190517	0.00890886	exonic	CRV2G00019610	CRV2G00019610	Similar to bcsl1b Probable mitochondrial chaperone BCS1-B (Dictyostelium discoideum)	GO:0034551;GO:0017111;GO:0005524;GO:0000166
unitig_464:3756	0.0398	0.0112	0.00349915	0.978361	0.0216394	0.00595431	0.0181402	0.00500905	0.0247031	0.0104476	downstream	CRV2G00021614(dist=50)	CRV2G00021614	Protein of unknown function	GO:0055114;GO:0008703;GO:0009231
unitig_31:5133	-0.02578	0.007804	0.97831	0.00272587	0.0216896	0.0059703	0.0189637	0.00524266	-0.0181465	0.0084799	exonic	CRV2G00020283	CRV2G00020283	Protein of unknown function	0
unitig_624:67688	0.02552	0.007741	0.00272695	0.978182	0.0218184	0.00598639	0.0190915	0.0052843	0.0179598	0.00839008	intergenic	CRV2G00019545(dist=15583),NONE(dist=NONE)	CRV2G00019545	Protein of unknown function	GO:0005515
scf_014:1044960	0.03721	0.01063	0.00341699	0.97818	0.0218203	0.00600245	0.0184033	0.00504983	0.0238912	0.0103156	exonic	CRV2G00012310	CRV2G00012310	Protein of unknown function	0
unitig_658:735136	0.03685	0.01055	0.00340838	0.978133	0.0218673	0.00601852	0.0184589	0.00507715	0.023765	0.0102968	intergenic	CRV2G00014353(dist=8236),NONE(dist=NONE)	CRV2G00014353	Protein of unknown function	0
scf_008:3318136	-0.02906	0.008661	0.978115	0.00297481	0.0218853	0.00603458	0.0189105	0.00521495	-0.0202291	0.0094049	downstream	CRV2G00001099(dist=570)	CRV2G00001099	Similar to MAL11 General alpha-glucoside permease (Saccharomyces cerevisiae (strain ATCC 204508 / S288c))	GO:0055085;GO:0016021;GO:0016020;GO:0022891;GO:0022857;GO:0006810;GO:0005215
unitig_200:43581	0.0288	0.008596	0.0029634	0.978081	0.021919	0.00605064	0.0189556	0.00522881	0.0200715	0.0093494	intergenic	CRV2G00019730(dist=3983),NONE(dist=NONE)	CRV2G00019730	Protein of unknown function	0
scf_005:4701281	0.03235	0.009488	0.00318933	0.97803	0.0219702	0.00606672	0.0187808	0.0051596	0.0219588	0.00993261	intergenic	CRV2G00003316(dist=6018),CRV2G00003317(dist=31104)	CRV2G00003316	Similar to MexAM1_META1p0182 Uncharacterized oxidoreductase MexAM1_META1p0182 (Methylobacterium extorquens (strain ATCC 14718 / DSM 1338 / JCM 2805 / NCIMB 9133 / AM1))	GO:0008152;GO:0016491
scf_014:1595687	0.04065	0.01141	0.00362614	0.977873	0.0221273	0.00608293	0.0185011	0.00509084	0.0248707	0.010521	intergenic	CRV2G00012489(dist=9547),NONE(dist=NONE)	CRV2G00012489	Protein of unknown function	0
unitig_315:14097	0.02997	0.008903	0.00307373	0.97786	0.0221397	0.00609911	0.019066	0.00527041	0.0207238	0.00959066	intergenic	CRV2G00020052(dist=5046),CRV2G00020053(dist=8429)	CRV2G00020052	Protein of unknown function	0
scf_022:882023	0.02776	0.00834	0.00293812	0.977804	0.022196	0.00611532	0.0192579	0.00529833	0.0194066	0.00910394	intergenic	CRV2G00004935(dist=19743),CRV2G00004936(dist=9017)	CRV2G00004935	Protein of unknown function	0
scf_014:1595702	0.0351	0.01016	0.00338313	0.977783	0.022217	0.00613152	0.0188339	0.00518723	0.023093	0.0101968	intergenic	CRV2G00012489(dist=9562),NONE(dist=NONE)	CRV2G00012489	Protein of unknown function	0
unitig_119:10709	0.02894	0.00865	0.00304125	0.97765	0.0223505	0.00614782	0.0193092	0.00531238	0.020113	0.00939216	downstream	CRV2G00021687(dist=126)	CRV2G00021687	Similar to byr1 Protein kinase byr1 (Schizosaccharomyces pombe (strain 972 / ATCC 24843))	GO:0016772;GO:0005524;GO:0006468;GO:0004672
unitig_1012:15547	0.03717	0.01065	0.00352484	0.977575	0.0224254	0.00616417	0.0189006	0.0052011	0.0237998	0.010342	upstream	CRV2G00021021,CRV2G00021022(dist=113)	CRV2G00021021	#N/A	#N/A
unitig_313:6944	-0.02792	0.008391	0.977569	0.0029856	0.0224305	0.00618048	0.0194449	0.00532654	-0.0194859	0.00915198	upstream	CRV2G00021950,CRV2G00021951(dist=342)	CRV2G00021950	Similar to ARA1 L-arabinose-responsive transcription regulator ARA1 (Magnaporthe oryzae (strain 70-15 / ATCC MYA-4617 / FGSC 8958))	0
unitig_55:8800	-0.02221	0.00689	0.977551	0.00257665	0.022449	0.00619678	0.0198724	0.00548383	-0.0156877	0.0070121	exonic	CRV2G00021189	CRV2G00021189	Similar to SPAC1002.16c Uncharacterized transporter C1002.16c (Schizosaccharomyces pombe (strain 972 / ATCC 24843))	GO:0055085;GO:0016021
unitig_821:1908303	-0.02608	0.007916	0.977467	0.00287306	0.0225333	0.00621313	0.0196602	0.00535516	-0.0182841	0.00860538	intergenic	CRV2G00008514(dist=10009),CRV2G00008515(dist=5840)	CRV2G00008514	Protein of unknown function	0
scf_003:2835090	0.0203	0.006383	0.00244394	0.977447	0.022553	0.00622947	0.0201091	0.00607403	0.0145158	0.00614801	exonic	CRV2G00007790	CRV2G00007790	Protein of unknown function	0
unitig_626:374835	0.02709	0.008184	0.00296024	0.977364	0.0226363	0.00624586	0.0196761	0.00536947	0.0189406	0.00892798	intergenic	CRV2G00017143(dist=1441),CRV2G00017144(dist=47378)	CRV2G00017143	Protein of unknown function	0
unitig_105:6634	0.02973	0.008869	0.00316082	0.97723	0.0227698	0.00626236	0.019609	0.00534084	0.0205261	0.00956457	intergenic	NONE(dist=NONE),CRV2G00018048(dist=3945)	CRV2G00018048	Protein of unknown function	0
unitig_625:9221	-0.02417	0.007426	0.977117	0.00278495	0.0228832	0.00627893	0.0200982	0.00606068	-0.0169665	0.00788967	intergenic	CRV2G00017675(dist=1092),CRV2G00017676(dist=2969)	CRV2G00017675	Similar to dlpA Protein DlpA (Legionella pneumophila subsp. pneumophila (strain Philadelphia 1 / ATCC 33152 / DSM 7513))	0
scf_004:619529	0.05733	0.01474	0.00433587	0.97702	0.02298	0.00629556	0.0186441	0.00513193	0.0286374	0.0127769	intergenic	CRV2G00009988(dist=3698),CRV2G00009989(dist=54621)	CRV2G00009988	Protein of unknown function	0
scf_003:2878135	0.03335	0.00979	0.00347217	0.97672	0.0232796	0.00631246	0.0198074	0.00542673	0.0222572	0.0100871	UTR3	CRV2G00007804(CRV2T00007804_1:c.*91T>C)	CRV2G00007804	Protein of unknown function	0
scf_003:2878454	0.03335	0.00979	0.00347217	0.97672	0.0232796	0.00632933	0.0198074	0.00544102	0.0222572	0.0100871	UTR3	CRV2G00007804(CRV2T00007804_1:c.*410G>A)	CRV2G00007804	Protein of unknown function	0
unitig_821:1907964	-0.02649	0.008056	0.976634	0.00302934	0.0233661	0.00634625	0.0203367	0.00611444	-0.018491	0.00876155	intergenic	CRV2G00008514(dist=9670),CRV2G00008515(dist=6179)	CRV2G00008514	Protein of unknown function	0
unitig_626:403210	0.03623	0.01048	0.00365798	0.976579	0.0234213	0.00636318	0.0197633	0.0054124	0.0233564	0.0103272	intergenic	CRV2G00017143(dist=29816),CRV2G00017144(dist=19003)	CRV2G00017143	Protein of unknown function	0
unitig_697:13206	0.03804	0.0109	0.0037701	0.97647	0.0235296	0.0063802	0.0197595	0.0053981	0.0239368	0.0104446	intergenic	NONE(dist=NONE),CRV2G00018376(dist=2143)	CRV2G00018376	Protein of unknown function	0
unitig_19:11237	0.03475	0.01014	0.00360815	0.976406	0.0235938	0.00639724	0.0199856	0.00603395	0.0227919	0.0102252	intergenic	CRV2G00021946(dist=10351),CRV2G00021947(dist=1152)	CRV2G00021946	Protein of unknown function	0
unitig_821:264414	0.04215	0.01181	0.00398556	0.976321	0.0236789	0.00641433	0.0196934	0.00538376	0.0250512	0.0106957	intergenic	CRV2G00007970(dist=50444),CRV2G00007971(dist=6058)	CRV2G00007970	Protein of unknown function	GO:0016758;GO:0005975;GO:0016020
unitig_196:16990	0.03939	0.01121	0.00386487	0.976311	0.0236894	0.0064314	0.0198245	0.00545531	0.0243169	0.0105302	downstream	CRV2G00019377,CRV2G00019378(dist=894)	CRV2G00019377	Protein of unknown function	0
unitig_196:17008	0.03939	0.01121	0.00386487	0.976311	0.0236894	0.00644844	0.0198245	0.00546956	0.0243169	0.0105302	downstream	CRV2G00019377,CRV2G00019378(dist=876)	CRV2G00019377	Protein of unknown function	0
unitig_502:10923	0.02233	0.006967	0.00276371	0.97626	0.0237396	0.00646549	0.0209759	0.00625137	0.0156982	0.0071035	intergenic	NONE(dist=NONE),NONE(dist=NONE)		#N/A	#N/A
scf_003:6235	0.03625	0.01051	0.00376017	0.976022	0.0239782	0.00648275	0.020218	0.00608746	0.0232954	0.010352	intergenic	CRV2G00006948(dist=3531),CRV2G00006949(dist=6797)	CRV2G00006948	Protein of unknown function	0
unitig_152:19418	-0.03331	0.009815	0.975925	0.00360846	0.024075	0.00650006	0.0204665	0.00614148	-0.0221496	0.0101111	exonic	CRV2G00019469	CRV2G00019469	Similar to ydcJ Uncharacterized protein YdcJ (Escherichia coli (strain K12))	0
unitig_41:33396	0.02813	0.008513	0.00326659	0.975887	0.0241126	0.00651738	0.020846	0.00622369	0.0194663	0.00924856	upstream	CRV2G00016356(dist=392)	CRV2G00016356	Protein of unknown function	0
unitig_289:649	0.037	0.01069	0.00382625	0.975879	0.0241206	0.00653467	0.0202943	0.00610094	0.0235316	0.0104075	intergenic	NONE(dist=NONE),CRV2G00018834(dist=8921)	CRV2G00018834	Similar to FUS6 Efflux pump FUS6 (Gibberella fujikuroi (strain CBS 195.34 / IMI 58289 / NRRL A-6831))	GO:0055085;GO:0016021
scf_022:859663	-0.03488	0.0102	0.97575	0.00373274	0.0242501	0.00655206	0.0205174	0.00616861	-0.0227646	0.010261	exonic	CRV2G00004935	CRV2G00004935	Protein of unknown function	0
scf_005:4783304	0.02981	0.008956	0.00343152	0.975614	0.0243858	0.00656954	0.0209543	0.00623753	0.0204119	0.00962455	intronic	CRV2G00003325	CRV2G00003325	Protein of unknown function	0
unitig_643:95656	0.05014	0.01347	0.00442401	0.975614	0.0243864	0.00658699	0.0199624	0.00600731	0.0267617	0.0115191	intergenic	CRV2G00019327(dist=36708),NONE(dist=NONE)	CRV2G00019327	Similar to betA Oxygen-dependent choline dehydrogenase (Burkholderia multivorans (strain ATCC 17616 / 249))	GO:0055114;GO:0050660;GO:0006066;GO:0016614;GO:0008812
unitig_332:11478	0.02656	0.008116	0.00320214	0.975547	0.0244526	0.00660447	0.0212505	0.00629332	0.0184526	0.00881021	intergenic	NONE(dist=NONE),CRV2G00019989(dist=5540)	CRV2G00019989	Protein of unknown function	0
unitig_821:2183486	0.03838	0.01102	0.00396044	0.97554	0.0244597	0.00662193	0.0204992	0.00615505	0.0239242	0.0105074	intergenic	CRV2G00008612(dist=1725),CRV2G00008613(dist=10746)	CRV2G00008612	Similar to TP53I3 Quinone oxidoreductase PIG3 (Homo sapiens)	GO:0055114;GO:0016747;GO:0008270;GO:0016491
unitig_821:2160350	0.02872	0.00868	0.00336824	0.975524	0.0244763	0.00663936	0.0211081	0.00626531	0.0197857	0.00939925	intergenic	CRV2G00008602(dist=2767),CRV2G00008603(dist=1253)	CRV2G00008602	Protein of unknown function	0
unitig_821:1902943	0.0345	0.01012	0.00375377	0.975508	0.024492	0.00665678	0.0207383	0.00618236	0.0225897	0.0102381	intergenic	CRV2G00008514(dist=4649),CRV2G00008515(dist=11200)	CRV2G00008514	Protein of unknown function	0
unitig_595:17706	-0.03557	0.01038	0.975369	0.0038411	0.0246314	0.0066743	0.0207903	0.00619613	-0.0229765	0.0103296	upstream	CRV2G00019121,CRV2G00019122(dist=106)	CRV2G00019121	Similar to Wwox WW domain-containing oxidoreductase (Mus musculus)	GO:0008152;GO:0016491
unitig_723:44168	0.02446	0.007567	0.00306459	0.975359	0.0246412	0.00669179	0.0215766	0.0064763	0.0170513	0.00805319	exonic	CRV2G00016672	CRV2G00016672	Protein of unknown function	0
scf_024:18783	0.028	0.008505	0.00336252	0.975228	0.0247724	0.00670938	0.0214098	0.00630746	0.0193306	0.0092317	intergenic	CRV2G00013073(dist=1993),CRV2G00013074(dist=6511)	CRV2G00013073	Protein of unknown function	GO:0005515
unitig_659:57402	0.06064	0.01544	0.00481232	0.975217	0.0247827	0.00672695	0.0199704	0.00602064	0.0291911	0.0136238	intergenic	CRV2G00019292(dist=1965),CRV2G00019293(dist=5538)	CRV2G00019292	Similar to chit42 Endochitinase 42 (Trichoderma harzianum)	GO:0004568;GO:0004553;GO:0005975;GO:0003824;GO:0006032
unitig_232:11644	0.02584	0.007941	0.00320732	0.975147	0.0248527	0.00674454	0.0216453	0.00649032	0.0179536	0.00857931	intergenic	NONE(dist=NONE),NONE(dist=NONE)		#N/A	#N/A
unitig_595:30618	0.07033	0.01713	0.00508957	0.975005	0.0249952	0.00676225	0.0199056	0.00549811	0.0318932	0.0161028	upstream	CRV2G00019127(dist=724)	CRV2G00019127	Protein of unknown function	0
unitig_595:30625	0.07033	0.01713	0.00508957	0.975005	0.0249952	0.00677991	0.0199056	0.00551236	0.0318932	0.0161028	upstream	CRV2G00019127(dist=731)	CRV2G00019127	Protein of unknown function	0
unitig_595:30630	0.07033	0.01713	0.00508957	0.975005	0.0249952	0.00679755	0.0199056	0.00552659	0.0318932	0.0161028	upstream	CRV2G00019127(dist=736)	CRV2G00019127	Protein of unknown function	0
unitig_595:30645	0.07033	0.01713	0.00508957	0.975005	0.0249952	0.00681515	0.0199056	0.00554078	0.0318932	0.0161028	upstream	CRV2G00019127(dist=751)	CRV2G00019127	Protein of unknown function	0
unitig_595:32124	0.07033	0.01713	0.00508957	0.975005	0.0249952	0.00683271	0.0199056	0.00555495	0.0318932	0.0161028	intergenic	CRV2G00019127(dist=2230),CRV2G00019128(dist=2727)	CRV2G00019127	Protein of unknown function	0
unitig_595:32129	0.07033	0.01713	0.00508957	0.975005	0.0249952	0.00685024	0.0199056	0.00556909	0.0318932	0.0161028	intergenic	CRV2G00019127(dist=2235),CRV2G00019128(dist=2722)	CRV2G00019127	Protein of unknown function	0
unitig_595:32155	0.07033	0.01713	0.00508957	0.975005	0.0249952	0.00686774	0.0199056	0.0055832	0.0318932	0.0161028	intergenic	CRV2G00019127(dist=2261),CRV2G00019128(dist=2696)	CRV2G00019127	Protein of unknown function	0
unitig_595:32174	0.07033	0.01713	0.00508957	0.975005	0.0249952	0.0068852	0.0199056	0.00559728	0.0318932	0.0161028	intergenic	CRV2G00019127(dist=2280),CRV2G00019128(dist=2677)	CRV2G00019127	Protein of unknown function	0
unitig_595:32192	0.07033	0.01713	0.00508957	0.975005	0.0249952	0.00690263	0.0199056	0.00561134	0.0318932	0.0161028	intergenic	CRV2G00019127(dist=2298),CRV2G00019128(dist=2659)	CRV2G00019127	Protein of unknown function	0
unitig_595:32236	0.07033	0.01713	0.00508957	0.975005	0.0249952	0.00692003	0.0199056	0.00562536	0.0318932	0.0161028	intergenic	CRV2G00019127(dist=2342),CRV2G00019128(dist=2615)	CRV2G00019127	Protein of unknown function	0
unitig_595:32385	0.07033	0.01713	0.00508957	0.975005	0.0249952	0.00693739	0.0199056	0.00563936	0.0318932	0.0161028	intergenic	CRV2G00019127(dist=2491),CRV2G00019128(dist=2466)	CRV2G00019127	Protein of unknown function	0
unitig_595:32398	0.07033	0.01713	0.00508957	0.975005	0.0249952	0.00695472	0.0199056	0.00565334	0.0318932	0.0161028	intergenic	CRV2G00019127(dist=2504),CRV2G00019128(dist=2453)	CRV2G00019127	Protein of unknown function	0
unitig_595:32450	0.07033	0.01713	0.00508957	0.975005	0.0249952	0.00697202	0.0199056	0.00566728	0.0318932	0.0161028	intergenic	CRV2G00019127(dist=2556),CRV2G00019128(dist=2401)	CRV2G00019127	Protein of unknown function	0
unitig_595:32457	0.07033	0.01713	0.00508957	0.975005	0.0249952	0.00698928	0.0199056	0.0056812	0.0318932	0.0161028	intergenic	CRV2G00019127(dist=2563),CRV2G00019128(dist=2394)	CRV2G00019127	Protein of unknown function	0
unitig_595:32478	0.07033	0.01713	0.00508957	0.975005	0.0249952	0.00700651	0.0199056	0.00569509	0.0318932	0.0161028	intergenic	CRV2G00019127(dist=2584),CRV2G00019128(dist=2373)	CRV2G00019127	Protein of unknown function	0
unitig_595:32488	0.07033	0.01713	0.00508957	0.975005	0.0249952	0.00702371	0.0199056	0.00570895	0.0318932	0.0161028	intergenic	CRV2G00019127(dist=2594),CRV2G00019128(dist=2363)	CRV2G00019127	Protein of unknown function	0
unitig_595:32607	0.07033	0.01713	0.00508957	0.975005	0.0249952	0.00704088	0.0199056	0.00572279	0.0318932	0.0161028	intergenic	CRV2G00019127(dist=2713),CRV2G00019128(dist=2244)	CRV2G00019127	Protein of unknown function	0
unitig_595:32615	0.07033	0.01713	0.00508957	0.975005	0.0249952	0.00705801	0.0199056	0.0057366	0.0318932	0.0161028	intergenic	CRV2G00019127(dist=2721),CRV2G00019128(dist=2236)	CRV2G00019127	Protein of unknown function	0
unitig_595:32640	0.07033	0.01713	0.00508957	0.975005	0.0249952	0.00707511	0.0199056	0.00575038	0.0318932	0.0161028	intergenic	CRV2G00019127(dist=2746),CRV2G00019128(dist=2211)	CRV2G00019127	Protein of unknown function	0
unitig_595:32660	0.07033	0.01713	0.00508957	0.975005	0.0249952	0.00709218	0.0199056	0.00576414	0.0318932	0.0161028	intergenic	CRV2G00019127(dist=2766),CRV2G00019128(dist=2191)	CRV2G00019127	Protein of unknown function	0
unitig_595:32701	0.07033	0.01713	0.00508957	0.975005	0.0249952	0.00710921	0.0199056	0.00577787	0.0318932	0.0161028	intergenic	CRV2G00019127(dist=2807),CRV2G00019128(dist=2150)	CRV2G00019127	Protein of unknown function	0
unitig_595:32716	0.07033	0.01713	0.00508957	0.975005	0.0249952	0.00712621	0.0199056	0.00579157	0.0318932	0.0161028	intergenic	CRV2G00019127(dist=2822),CRV2G00019128(dist=2135)	CRV2G00019127	Protein of unknown function	0
unitig_595:32733	0.07033	0.01713	0.00508957	0.975005	0.0249952	0.00714318	0.0199056	0.00580525	0.0318932	0.0161028	intergenic	CRV2G00019127(dist=2839),CRV2G00019128(dist=2118)	CRV2G00019127	Protein of unknown function	0
unitig_595:32753	0.07033	0.01713	0.00508957	0.975005	0.0249952	0.00716012	0.0199056	0.0058189	0.0318932	0.0161028	intergenic	CRV2G00019127(dist=2859),CRV2G00019128(dist=2098)	CRV2G00019127	Protein of unknown function	0
unitig_595:32919	0.07033	0.01713	0.00508957	0.975005	0.0249952	0.00717702	0.0199056	0.00583252	0.0318932	0.0161028	intergenic	CRV2G00019127(dist=3025),CRV2G00019128(dist=1932)	CRV2G00019127	Protein of unknown function	0
unitig_595:32949	0.07033	0.01713	0.00508957	0.975005	0.0249952	0.0071939	0.0199056	0.00584612	0.0318932	0.0161028	intergenic	CRV2G00019127(dist=3055),CRV2G00019128(dist=1902)	CRV2G00019127	Protein of unknown function	0
unitig_595:32964	0.07033	0.01713	0.00508957	0.975005	0.0249952	0.00721074	0.0199056	0.00585969	0.0318932	0.0161028	intergenic	CRV2G00019127(dist=3070),CRV2G00019128(dist=1887)	CRV2G00019127	Protein of unknown function	0
unitig_595:32972	0.07033	0.01713	0.00508957	0.975005	0.0249952	0.00722755	0.0199056	0.00587324	0.0318932	0.0161028	intergenic	CRV2G00019127(dist=3078),CRV2G00019128(dist=1879)	CRV2G00019127	Protein of unknown function	0
unitig_595:33025	0.07033	0.01713	0.00508957	0.975005	0.0249952	0.00724433	0.0199056	0.00588675	0.0318932	0.0161028	intergenic	CRV2G00019127(dist=3131),CRV2G00019128(dist=1826)	CRV2G00019127	Protein of unknown function	0
unitig_595:33086	0.07033	0.01713	0.00508957	0.975005	0.0249952	0.00726107	0.0199056	0.00590025	0.0318932	0.0161028	intergenic	CRV2G00019127(dist=3192),CRV2G00019128(dist=1765)	CRV2G00019127	Protein of unknown function	0
unitig_595:33091	0.07033	0.01713	0.00508957	0.975005	0.0249952	0.00727779	0.0199056	0.00591371	0.0318932	0.0161028	intergenic	CRV2G00019127(dist=3197),CRV2G00019128(dist=1760)	CRV2G00019127	Protein of unknown function	0
unitig_595:33191	0.07033	0.01713	0.00508957	0.975005	0.0249952	0.00729447	0.0199056	0.00592715	0.0318932	0.0161028	intergenic	CRV2G00019127(dist=3297),CRV2G00019128(dist=1660)	CRV2G00019127	Protein of unknown function	0
unitig_595:33240	0.07033	0.01713	0.00508957	0.975005	0.0249952	0.00731112	0.0199056	0.00594057	0.0318932	0.0161028	intergenic	CRV2G00019127(dist=3346),CRV2G00019128(dist=1611)	CRV2G00019127	Protein of unknown function	0
unitig_595:33247	0.07033	0.01713	0.00508957	0.975005	0.0249952	0.00732774	0.0199056	0.00595396	0.0318932	0.0161028	intergenic	CRV2G00019127(dist=3353),CRV2G00019128(dist=1604)	CRV2G00019127	Protein of unknown function	0
unitig_595:33261	0.07033	0.01713	0.00508957	0.975005	0.0249952	0.00734433	0.0199056	0.00596732	0.0318932	0.0161028	intergenic	CRV2G00019127(dist=3367),CRV2G00019128(dist=1590)	CRV2G00019127	Protein of unknown function	0
unitig_595:35844	0.07033	0.01713	0.00508957	0.975005	0.0249952	0.00736089	0.0199056	0.00598066	0.0318932	0.0161028	exonic	CRV2G00019128	CRV2G00019128	Protein of unknown function	GO:0006355;GO:0000981;GO:0005634;GO:0008270
unitig_595:35895	0.07033	0.01713	0.00508957	0.975005	0.0249952	0.00737741	0.0199056	0.00599397	0.0318932	0.0161028	intronic	CRV2G00019128	CRV2G00019128	Protein of unknown function	GO:0006355;GO:0000981;GO:0005634;GO:0008270
unitig_111:290050	0.02883	0.00873	0.00346581	0.974974	0.025026	0.00739394	0.0215601	0.00646232	0.0198004	0.009438	intergenic	CRV2G00016027(dist=3712),CRV2G00016028(dist=18564)	CRV2G00016027	Similar to trx Thioredoxin (Neurospora crassa (strain ATCC 24698 / 74-OR23-1A / CBS 708.71 / DSM 1257 / FGSC 987))	GO:0006662;GO:0015035;GO:0045454
unitig_595:31189	0.067	0.01657	0.00503798	0.974902	0.025098	0.0074105	0.02006	0.00604731	0.0308948	0.015252	intergenic	CRV2G00019127(dist=1295),CRV2G00019128(dist=3662)	CRV2G00019127	Protein of unknown function	0
unitig_673:92188	0.02562	0.007894	0.00323674	0.974839	0.0251606	0.00742709	0.0219239	0.00653282	0.0177874	0.00850868	intergenic	CRV2G00018922(dist=37172),CRV2G00018923(dist=5486)	CRV2G00018922	Protein of unknown function	0
scf_014:984626	-0.02661	0.008157	0.974805	0.00332163	0.025195	0.00744368	0.0218733	0.00651862	-0.0184284	0.00884352	intergenic	CRV2G00012293(dist=16623),CRV2G00012294(dist=13867)	CRV2G00012293	Protein of unknown function	GO:0005975;GO:0003824
scf_024:1664	0.022	0.006928	0.00294184	0.974783	0.0252166	0.00746026	0.0222748	0.00659047	0.0154162	0.00699345	intergenic	NONE(dist=NONE),CRV2G00013073(dist=13529)	CRV2G00013073	Protein of unknown function	GO:0005515
unitig_697:194365	0.06021	0.01539	0.00490456	0.974748	0.0252525	0.00747684	0.0203479	0.00612792	0.0290018	0.013533	intergenic	CRV2G00018416(dist=6229),CRV2G00018417(dist=1367)	CRV2G00018416	Similar to tsc10 3-ketodihydrosphingosine reductase tsc10 (Emericella nidulans (strain FGSC A4 / ATCC 38163 / CBS 112.46 / NRRL 194 / M139))	GO:0008152;GO:0016491
unitig_200:24624	0.03458	0.01018	0.00392886	0.974559	0.0254414	0.00749357	0.0215126	0.00639218	0.0225129	0.0102794	upstream	CRV2G00019727(dist=454)	CRV2G00019727	Protein of unknown function	0
scf_014:1011054	0.04317	0.01212	0.00440745	0.974393	0.0256075	0.00751042	0.0212	0.00627931	0.0250495	0.0108663	intergenic	CRV2G00012294(dist=12171),CRV2G00012295(dist=1596)	CRV2G00012294	Protein of unknown function	0
scf_014:988417	-0.0404	0.01153	0.974232	0.00431035	0.0257682	0.00752739	0.0214578	0.00632162	-0.0243343	0.0106896	intergenic	CRV2G00012293(dist=20414),CRV2G00012294(dist=10076)	CRV2G00012293	Protein of unknown function	GO:0005975;GO:0003824
scf_014:988461	-0.0404	0.01153	0.974232	0.00431035	0.0257682	0.00754432	0.0214578	0.00633576	-0.0243343	0.0106896	intergenic	CRV2G00012293(dist=20458),CRV2G00012294(dist=10032)	CRV2G00012293	Protein of unknown function	GO:0005975;GO:0003824
unitig_785:99657	0.02563	0.00792	0.00333668	0.974193	0.0258073	0.00756126	0.0224706	0.00663385	0.0177495	0.00852725	intergenic	CRV2G00019371(dist=3869),NONE(dist=NONE)	CRV2G00019371	Similar to yfcG Disulfide-bond oxidoreductase YfcG (Escherichia coli (strain K12))	GO:0005515
unitig_152:17302	0.05875	0.01516	0.0049938	0.974162	0.0258383	0.0075782	0.0208445	0.00620992	0.0285385	0.0132084	intronic	CRV2G00019468	CRV2G00019468	Similar to AAT2 Aspartate aminotransferase, cytoplasmic (Saccharomyces cerevisiae (strain ATCC 204508 / S288c))	GO:0008483;GO:0009058;GO:0003824;GO:0030170;GO:0006520
scf_022:3439372	0.031	0.009327	0.0038075	0.973887	0.0261132	0.00759537	0.0223057	0.00660489	0.0208661	0.00987726	intergenic	CRV2G00005838(dist=16225),CRV2G00005839(dist=21224)	CRV2G00005838	Protein of unknown function	GO:0016772
scf_003:2822221	0.02403	0.007504	0.00324858	0.973874	0.0261264	0.00761251	0.0228779	0.00670712	0.0166771	0.00791255	exonic	CRV2G00007786	CRV2G00007786	Protein of unknown function	0
unitig_105:231143	0.03237	0.009677	0.00393657	0.973703	0.026297	0.00762978	0.0223604	0.00661933	0.0214971	0.0100753	intergenic	CRV2G00018099(dist=16657),CRV2G00018100(dist=14792)	CRV2G00018099	Similar to TIC32 Short-chain dehydrogenase TIC 32, chloroplastic (Arabidopsis thaliana)	GO:0008152;GO:0016491
unitig_818:226941	-0.01912	0.006178	0.973666	0.00283021	0.0263338	0.00764705	0.0235035	0.0068868	-0.013722	0.00576224	exonic	CRV2G00017633	CRV2G00017633	Protein of unknown function	GO:0009116;GO:0005515;GO:0003824;GO:0043531
unitig_697:243710	0.03547	0.01043	0.00414668	0.973661	0.0263386	0.00766429	0.0221919	0.00654724	0.022744	0.0103859	exonic	CRV2G00018430	CRV2G00018430	Protein of unknown function	GO:0003676;GO:0004523
scf_001:1358879	0.01645	0.00543	0.00258072	0.973477	0.0265231	0.00768167	0.0239424	0.00703818	0.0124402	0.00484441	exonic	CRV2G00003837	CRV2G00003837	Similar to CDC1 Cell division control protein 1 (Saccharomyces cerevisiae (strain ATCC 204508 / S288c))	GO:0016787
unitig_611:4963	-0.0295	0.008964	0.973388	0.00377933	0.0266121	0.0076991	0.0228328	0.00669237	-0.0200354	0.00962062	intergenic	NONE(dist=NONE),NONE(dist=NONE)		#N/A	#N/A
scf_003:147183	0.05861	0.01518	0.0051728	0.973331	0.0266695	0.00771655	0.0214967	0.0063499	0.028376	0.0132045	exonic	CRV2G00006984	CRV2G00006984	Similar to OLE1 Acyl-CoA desaturase (Ajellomyces capsulatus)	GO:0005783;GO:0016717;GO:0004768;GO:0006629;GO:0055114;GO:0006633;GO:0020037;GO:0016020;GO:0005506
scf_003:147213	0.05861	0.01518	0.0051728	0.973331	0.0266695	0.00773397	0.0214967	0.00636402	0.028376	0.0132045	exonic	CRV2G00006984	CRV2G00006984	Similar to OLE1 Acyl-CoA desaturase (Ajellomyces capsulatus)	GO:0005783;GO:0016717;GO:0004768;GO:0006629;GO:0055114;GO:0006633;GO:0020037;GO:0016020;GO:0005506
scf_003:148497	0.05861	0.01518	0.0051728	0.973331	0.0266695	0.00775136	0.0214967	0.00637811	0.028376	0.0132045	upstream;downstream	CRV2G00006984(dist=311);CRV2G00006985(dist=165)	CRV2G00006984	Similar to OLE1 Acyl-CoA desaturase (Ajellomyces capsulatus)	GO:0005783;GO:0016717;GO:0004768;GO:0006629;GO:0055114;GO:0006633;GO:0020037;GO:0016020;GO:0005506
scf_014:1044407	0.03497	0.01033	0.00419826	0.973209	0.0267909	0.00776883	0.0225926	0.00666293	0.0225105	0.0103605	upstream	CRV2G00012309,CRV2G00012310(dist=73)	CRV2G00012309	Similar to DDB_G0271550 Probable myosin light chain kinase DDB_G0271550 (Dictyostelium discoideum)	GO:0005515;GO:0016772;GO:0005524;GO:0004674;GO:0006468;GO:0004672
unitig_439:5672	-0.05375	0.01429	0.973151	0.00506295	0.0268492	0.00778632	0.0217862	0.00650444	-0.0272142	0.012221	intergenic	NONE(dist=NONE),NONE(dist=NONE)		#N/A	#N/A
unitig_595:31337	0.0633	0.01603	0.00535077	0.973113	0.026887	0.00780381	0.0215363	0.00640626	0.0295433	0.014332	intergenic	CRV2G00019127(dist=1443),CRV2G00019128(dist=3514)	CRV2G00019127	Protein of unknown function	0
unitig_595:31561	0.0633	0.01603	0.00535077	0.973113	0.026887	0.00782127	0.0215363	0.00642031	0.0295433	0.014332	intergenic	CRV2G00019127(dist=1667),CRV2G00019128(dist=3290)	CRV2G00019127	Protein of unknown function	0
unitig_595:31611	0.0633	0.01603	0.00535077	0.973113	0.026887	0.0078387	0.0215363	0.00643433	0.0295433	0.014332	intergenic	CRV2G00019127(dist=1717),CRV2G00019128(dist=3240)	CRV2G00019127	Protein of unknown function	0
unitig_595:31797	0.0633	0.01603	0.00535077	0.973113	0.026887	0.00785609	0.0215363	0.00644833	0.0295433	0.014332	intergenic	CRV2G00019127(dist=1903),CRV2G00019128(dist=3054)	CRV2G00019127	Protein of unknown function	0
unitig_785:37185	-0.04331	0.01221	0.973104	0.00467057	0.0268959	0.00787347	0.0222254	0.00656166	-0.024921	0.0109403	downstream	CRV2G00019354,CRV2G00019355(dist=280)	CRV2G00019354	Protein of unknown function	0
unitig_785:37191	-0.04331	0.01221	0.973104	0.00467057	0.0268959	0.00789081	0.0222254	0.00657606	-0.024921	0.0109403	downstream	CRV2G00019354,CRV2G00019355(dist=286)	CRV2G00019354	Protein of unknown function	0
unitig_595:17458	-0.0279	0.008564	0.972967	0.00372017	0.0270329	0.00790824	0.0233128	0.00681173	-0.019084	0.0092584	upstream	CRV2G00019121,CRV2G00019122(dist=354)	CRV2G00019121	Similar to Wwox WW domain-containing oxidoreductase (Mus musculus)	GO:0008152;GO:0016491
unitig_189:4039	0.02646	0.008187	0.00361094	0.972887	0.027113	0.00792571	0.023502	0.0068718	0.0181922	0.00883887	upstream	CRV2G00021913,CRV2G00021914(dist=464)	CRV2G00021913	Protein of unknown function	0
unitig_251:10014	0.02948	0.00898	0.00387145	0.97283	0.0271699	0.00794321	0.0232985	0.00679677	0.0199749	0.00963002	intergenic	CRV2G00016834(dist=6502),CRV2G00016835(dist=9573)	CRV2G00016834	Protein of unknown function	0
unitig_821:2385056	0.03793	0.01104	0.00445678	0.972785	0.0272153	0.00796071	0.0227585	0.00667763	0.0234584	0.0105959	downstream	CRV2G00008673(dist=289)	CRV2G00008673	Protein of unknown function	0
unitig_273:49356	-0.02412	0.007565	0.972783	0.00341937	0.027217	0.00797819	0.0237976	0.00693224	-0.0166732	0.00797566	intergenic	CRV2G00019160(dist=5424),CRV2G00019161(dist=1421)	CRV2G00019160	Protein of unknown function	0
unitig_105:185805	0.04479	0.01254	0.00482041	0.972691	0.0273086	0.00799571	0.0224882	0.00664835	0.0252092	0.0110792	intergenic	CRV2G00018092(dist=4377),CRV2G00018093(dist=2432)	CRV2G00018092	Protein of unknown function	0
unitig_641:6052	0.02548	0.007939	0.00358341	0.972513	0.0274873	0.00801337	0.0239038	0.00700792	0.0175404	0.00851091	UTR5	CRV2G00022271(CRV2T00022271_1:c.-297G>A)	CRV2G00022271	Similar to stcW Putative sterigmatocystin biosynthesis monooxygenase stcW (Emericella nidulans (strain FGSC A4 / ATCC 38163 / CBS 112.46 / NRRL 194 / M139))	0
scf_014:978764	-0.03402	0.01013	0.972506	0.0042638	0.0274941	0.008031	0.0232303	0.00676684	-0.0220697	0.010296	intergenic	CRV2G00012293(dist=10761),CRV2G00012294(dist=19729)	CRV2G00012293	Protein of unknown function	GO:0005975;GO:0003824
scf_003:2854819	0.0287	0.008798	0.00389876	0.972288	0.0277125	0.00804879	0.0238137	0.0069474	0.0194942	0.00947196	upstream;downstream	CRV2G00007799,CRV2G00007800(dist=107);CRV2G00007798,CRV2G00007801(dist=107)	CRV2G00007799	Similar to laeA Secondary metabolism regulator laeA (Monascus pilosus)	0
scf_003:2854847	0.0287	0.008798	0.00389876	0.972288	0.0277125	0.00806656	0.0238137	0.00696254	0.0194942	0.00947196	upstream;downstream	CRV2G00007799,CRV2G00007800(dist=79);CRV2G00007798,CRV2G00007801(dist=79)	CRV2G00007799	Similar to laeA Secondary metabolism regulator laeA (Monascus pilosus)	0
unitig_785:30832	-0.03562	0.01053	0.972111	0.00444267	0.027889	0.00808445	0.0234464	0.00685678	-0.0226258	0.0104527	intergenic	CRV2G00019352(dist=5923),CRV2G00019353(dist=1073)	CRV2G00019352	Protein of unknown function	0
scf_022:881786	0.02676	0.008301	0.00379282	0.971912	0.0280879	0.00810248	0.0242951	0.00709931	0.0183102	0.00895485	intergenic	CRV2G00004935(dist=19506),CRV2G00004936(dist=9254)	CRV2G00004935	Protein of unknown function	0
unitig_924:675	0.04244	0.01208	0.00487558	0.971874	0.0281259	0.00812052	0.0232503	0.0067818	0.0245644	0.0109338	intergenic	NONE(dist=NONE),NONE(dist=NONE)		#N/A	#N/A
unitig_105:175846	0.03174	0.009593	0.00421801	0.971843	0.0281574	0.00813856	0.0239394	0.00702306	0.0210232	0.0100432	intergenic	CRV2G00018091(dist=1229),CRV2G00018092(dist=4788)	CRV2G00018091	Similar to cfp Pyruvate decarboxylase (Neurospora crassa (strain ATCC 24698 / 74-OR23-1A / CBS 708.71 / DSM 1257 / FGSC 987))	GO:0030976;GO:0003824;GO:0000287
scf_001:3841087	0.03354	0.01004	0.00435326	0.971828	0.0281715	0.00815657	0.0238182	0.00697766	0.0218061	0.0102672	intergenic	CRV2G00004612(dist=1418),CRV2G00004613(dist=22373)	CRV2G00004612	Protein of unknown function	GO:0055085;GO:0016021
unitig_747:50230	-0.02483	0.007788	0.971825	0.00363047	0.0281753	0.00817456	0.0245449	0.00713025	-0.0170777	0.00828186	intergenic	CRV2G00019409(dist=1328),CRV2G00019410(dist=5452)	CRV2G00019409	Protein of unknown function	0
scf_003:457940	0.04407	0.01243	0.00496815	0.971804	0.0281956	0.00819253	0.0232274	0.00675187	0.0249374	0.0110614	intergenic	CRV2G00007051(dist=62175),CRV2G00007052(dist=2340)	CRV2G00007051	Protein of unknown function	0
unitig_333:205698	0.03463	0.01031	0.00445331	0.971697	0.0283026	0.00821057	0.0238493	0.00699278	0.0222201	0.0103803	intergenic	CRV2G00018666(dist=26634),CRV2G00018668(dist=6018)	CRV2G00018666	Protein of unknown function	GO:0003676;GO:0046872
unitig_651:4986	-0.01	0.003416	0.971611	0.00185253	0.0283894	0.00822865	0.0265368	0.00804785	-0.00916534	0.00336463	intergenic	NONE(dist=NONE),NONE(dist=NONE)		#N/A	#N/A
unitig_651:4996	-0.01	0.003416	0.971611	0.00185253	0.0283894	0.0082467	0.0265368	0.00806345	-0.00916534	0.00336463	intergenic	NONE(dist=NONE),NONE(dist=NONE)		#N/A	#N/A
unitig_818:191472	0.05489	0.01459	0.00546441	0.971477	0.0285234	0.00826483	0.023059	0.00672201	0.0272384	0.0125017	exonic	CRV2G00017626	CRV2G00017626	Protein of unknown function	0
unitig_818:191479	0.05489	0.01459	0.00546441	0.971477	0.0285234	0.00828294	0.023059	0.00673688	0.0272384	0.0125017	exonic	CRV2G00017626	CRV2G00017626	Protein of unknown function	0
unitig_821:1899508	-0.02938	0.009006	0.971432	0.00409961	0.0285676	0.00830105	0.024468	0.00711476	-0.0197992	0.00964187	intergenic	CRV2G00008514(dist=1214),CRV2G00008515(dist=14635)	CRV2G00008514	Protein of unknown function	0
unitig_643:77685	0.04006	0.01158	0.00484506	0.971399	0.0286006	0.00831916	0.0237556	0.00691706	0.0239057	0.0107917	intergenic	CRV2G00019327(dist=18737),NONE(dist=NONE)	CRV2G00019327	Similar to betA Oxygen-dependent choline dehydrogenase (Burkholderia multivorans (strain ATCC 17616 / 249))	GO:0055114;GO:0050660;GO:0006066;GO:0016614;GO:0008812
scf_014:965455	-0.0258	0.008065	0.97133	0.0037981	0.02867	0.0083373	0.0248719	0.00728585	-0.017668	0.00865044	intergenic	CRV2G00012292(dist=1219),CRV2G00012293(dist=2255)	CRV2G00012292	Protein of unknown function	0
unitig_818:97602	0.0288	0.008862	0.00408197	0.971244	0.0287559	0.00835548	0.0246739	0.00714583	0.0194643	0.0095184	intergenic	CRV2G00017606(dist=7531),CRV2G00017607(dist=11371)	CRV2G00017606	Protein of unknown function	0
scf_004:1153151	-0.051	0.01386	0.971198	0.00538608	0.0288024	0.00837367	0.0234164	0.00682676	-0.0263557	0.0118623	downstream	CRV2G00010135(dist=916)	CRV2G00010135	Protein of unknown function	GO:0007155;GO:0030246
unitig_225:46064	0.02777	0.008595	0.00400672	0.971153	0.0288474	0.00839187	0.0248407	0.00722369	0.018865	0.00926333	upstream	CRV2G00018752(dist=517)	CRV2G00018752	Protein of unknown function	0
unitig_643:71454	0.03483	0.01038	0.00456842	0.971149	0.028851	0.00841004	0.0242826	0.00708398	0.0222372	0.0104162	intergenic	CRV2G00019327(dist=12506),NONE(dist=NONE)	CRV2G00019327	Similar to betA Oxygen-dependent choline dehydrogenase (Burkholderia multivorans (strain ATCC 17616 / 249))	GO:0055114;GO:0050660;GO:0006066;GO:0016614;GO:0008812
unitig_673:90901	0.02761	0.008553	0.00399349	0.971146	0.0288541	0.00842818	0.0248606	0.00723927	0.0187698	0.00921988	intergenic	CRV2G00018922(dist=35885),CRV2G00018923(dist=6773)	CRV2G00018922	Protein of unknown function	0
unitig_673:92493	0.02761	0.008553	0.00399349	0.971146	0.0288541	0.00844629	0.0248606	0.00725482	0.0187698	0.00921988	intergenic	CRV2G00018922(dist=37477),CRV2G00018923(dist=5181)	CRV2G00018922	Protein of unknown function	0
unitig_673:95768	0.02761	0.008553	0.00399349	0.971146	0.0288541	0.00846436	0.0248606	0.00727035	0.0187698	0.00921988	intergenic	CRV2G00018922(dist=40752),CRV2G00018923(dist=1906)	CRV2G00018922	Protein of unknown function	0
unitig_114:263069	0.04711	0.01309	0.00524561	0.97112	0.0288799	0.00848243	0.0236343	0.00690189	0.0255217	0.0113766	exonic	CRV2G00014449	CRV2G00014449	Protein of unknown function	0
unitig_818:161664	0.05356	0.01436	0.00551223	0.971048	0.0289524	0.00850053	0.0234402	0.00684178	0.0268867	0.0122788	exonic	CRV2G00017620	CRV2G00017620	Protein of unknown function	GO:0003676;GO:0046872
unitig_238:2828	0.026	0.008129	0.00386581	0.971021	0.0289789	0.00851862	0.0251131	0.00734829	0.017774	0.00872603	upstream;downstream	CRV2G00020920(dist=824);CRV2G00020921(dist=126)	CRV2G00020920	Protein of unknown function	0
unitig_673:154185	0.03265	0.009858	0.00446263	0.97086	0.0291401	0.00853682	0.0246774	0.00716139	0.0213353	0.0101914	intergenic	CRV2G00018934(dist=3588),CRV2G00018936(dist=8918)	CRV2G00018934	Protein of unknown function	GO:0006508;GO:0008234
unitig_818:229160	-0.03158	0.009591	0.970833	0.00438399	0.0291669	0.00855501	0.0247829	0.0072081	-0.0208527	0.0100462	exonic	CRV2G00017634	CRV2G00017634	Protein of unknown function	0
unitig_333:197279	0.04157	0.01194	0.00505295	0.970766	0.0292342	0.00857323	0.0241812	0.00706864	0.0242212	0.0109205	intergenic	CRV2G00018666(dist=18215),CRV2G00018668(dist=14437)	CRV2G00018666	Protein of unknown function	GO:0003676;GO:0046872
unitig_41:193706	0.02588	0.008108	0.00390727	0.970689	0.0293105	0.00859149	0.0254033	0.00761256	0.0176768	0.00869168	intergenic	CRV2G00016391(dist=9896),CRV2G00016392(dist=10771)	CRV2G00016391	Protein of unknown function	0
unitig_227:53327	0.02482	0.007824	0.00381108	0.970651	0.0293487	0.00860974	0.0255376	0.00764347	0.0170015	0.00830344	intergenic	CRV2G00019646(dist=2369),NONE(dist=NONE)	CRV2G00019646	Protein of unknown function	GO:0005576
scf_004:629734	0.03082	0.00941	0.00437852	0.970514	0.029486	0.00862809	0.0251075	0.00733268	0.0204605	0.00993419	intergenic	CRV2G00009988(dist=13903),CRV2G00009989(dist=44416)	CRV2G00009988	Protein of unknown function	0
unitig_332:13383	0.03597	0.01068	0.00477761	0.970449	0.0295512	0.00864646	0.0247736	0.00719253	0.0225684	0.0105373	intergenic	NONE(dist=NONE),CRV2G00019989(dist=3635)	CRV2G00019989	Protein of unknown function	0
unitig_71:357	-0.0173	0.005752	0.970433	0.00304674	0.0295672	0.00866481	0.0265204	0.00803222	-0.0127313	0.00518662	upstream	CRV2G00021992(dist=268)	CRV2G00021992	Protein of unknown function	GO:0055114;GO:0016491
unitig_105:231040	0.02767	0.008595	0.0041228	0.970396	0.029604	0.00868316	0.0254812	0.007628	0.018749	0.00925201	intergenic	CRV2G00018099(dist=16554),CRV2G00018100(dist=14895)	CRV2G00018099	Similar to TIC32 Short-chain dehydrogenase TIC 32, chloroplastic (Arabidopsis thaliana)	GO:0008152;GO:0016491
unitig_508:12657	0.03227	0.009788	0.00455118	0.970204	0.029796	0.00870165	0.0252449	0.00739508	0.0211061	0.0101596	intergenic	CRV2G00021611(dist=1249),NONE(dist=NONE)	CRV2G00021611	Protein of unknown function	0
unitig_502:6309	0.03682	0.0109	0.00492922	0.969952	0.0300478	0.00872032	0.0251185	0.00736388	0.0227967	0.010621	intergenic	NONE(dist=NONE),NONE(dist=NONE)		#N/A	#N/A
unitig_502:6317	0.03682	0.0109	0.00492922	0.969952	0.0300478	0.00873897	0.0251185	0.00737944	0.0227967	0.010621	intergenic	NONE(dist=NONE),NONE(dist=NONE)		#N/A	#N/A
scf_001:3850829	-0.04476	0.01266	0.969899	0.00539227	0.0301014	0.00875762	0.0247091	0.00717694	-0.0248647	0.0112059	intergenic	CRV2G00004612(dist=11160),CRV2G00004613(dist=12631)	CRV2G00004612	Protein of unknown function	GO:0055085;GO:0016021
scf_003:414537	0.063	0.01615	0.00607585	0.96989	0.0301102	0.00877625	0.0240344	0.00705336	0.028944	0.0143176	intergenic	CRV2G00007051(dist=18772),CRV2G00007052(dist=45743)	CRV2G00007051	Protein of unknown function	0
unitig_333:205464	-0.02758	0.008592	0.96979	0.00421499	0.03021	0.00879494	0.025995	0.00786114	-0.0186513	0.00923961	intergenic	CRV2G00018666(dist=26400),CRV2G00018668(dist=6252)	CRV2G00018666	Protein of unknown function	GO:0003676;GO:0046872
unitig_154:56074	-0.02143	0.00693	0.969671	0.00361094	0.0303291	0.0088137	0.0267181	0.00823446	-0.0148432	0.00686673	intergenic	CRV2G00018944(dist=26044),CRV2G00018945(dist=17138)	CRV2G00018944	Protein of unknown function	0
unitig_41:283779	0.03328	0.01006	0.00473123	0.969649	0.0303506	0.00883244	0.0256194	0.00765898	0.0214819	0.0103004	upstream	CRV2G00016400(dist=202)	CRV2G00016400	Protein of unknown function	0
unitig_595:19101	-0.0305	0.009361	0.969609	0.00451026	0.0303907	0.00885119	0.0258805	0.00769031	-0.0202227	0.00990004	exonic	CRV2G00019122	CRV2G00019122	Protein of unknown function	0
unitig_595:19156	-0.0305	0.009361	0.969609	0.00451026	0.0303907	0.0088699	0.0258805	0.00770597	-0.0202227	0.00990004	UTR3	CRV2G00019122(CRV2T00019122_1:c.*55G>A)	CRV2G00019122	Protein of unknown function	0
unitig_595:19171	-0.0305	0.009361	0.969609	0.00451026	0.0303907	0.00888859	0.0258805	0.00772159	-0.0202227	0.00990004	UTR3	CRV2G00019122(CRV2T00019122_1:c.*70C>T)	CRV2G00019122	Protein of unknown function	0
unitig_595:19228	-0.0305	0.009361	0.969609	0.00451026	0.0303907	0.00890723	0.0258805	0.00773719	-0.0202227	0.00990004	UTR3	CRV2G00019122(CRV2T00019122_1:c.*127G>T)	CRV2G00019122	Protein of unknown function	0
unitig_595:19245	-0.0305	0.009361	0.969609	0.00451026	0.0303907	0.00892585	0.0258805	0.00775277	-0.0202227	0.00990004	UTR3	CRV2G00019122(CRV2T00019122_1:c.*144G>T)	CRV2G00019122	Protein of unknown function	0
unitig_595:19268	-0.0305	0.009361	0.969609	0.00451026	0.0303907	0.00894443	0.0258805	0.00776831	-0.0202227	0.00990004	UTR3	CRV2G00019122(CRV2T00019122_1:c.*167C>T)	CRV2G00019122	Protein of unknown function	0
unitig_595:19273	-0.0305	0.009361	0.969609	0.00451026	0.0303907	0.00896299	0.0258805	0.00778383	-0.0202227	0.00990004	UTR3	CRV2G00019122(CRV2T00019122_1:c.*172G>A)	CRV2G00019122	Protein of unknown function	0
unitig_595:19291	-0.0305	0.009361	0.969609	0.00451026	0.0303907	0.00898151	0.0258805	0.00779933	-0.0202227	0.00990004	UTR3	CRV2G00019122(CRV2T00019122_1:c.*190C>T)	CRV2G00019122	Protein of unknown function	0
unitig_595:19482	-0.0305	0.009361	0.969609	0.00451026	0.0303907	0.009	0.0258805	0.0078148	-0.0202227	0.00990004	downstream	CRV2G00019122,CRV2G00019123(dist=270)	CRV2G00019122	Protein of unknown function	0
unitig_595:20956	-0.0305	0.009361	0.969609	0.00451026	0.0303907	0.00901845	0.0258805	0.00783024	-0.0202227	0.00990004	exonic	CRV2G00019124	CRV2G00019124	Protein of unknown function	GO:0008152;GO:0016846
unitig_595:20999	-0.0305	0.009361	0.969609	0.00451026	0.0303907	0.00903688	0.0258805	0.00784565	-0.0202227	0.00990004	exonic	CRV2G00019124	CRV2G00019124	Protein of unknown function	GO:0008152;GO:0016846
scf_003:442307	0.0286	0.008869	0.00434808	0.969565	0.0304353	0.00905531	0.0260873	0.00792304	0.0192181	0.0095073	intergenic	CRV2G00007051(dist=46542),CRV2G00007052(dist=17973)	CRV2G00007051	Protein of unknown function	0
scf_001:3910282	-0.02971	0.009161	0.969501	0.00445984	0.0304995	0.00907376	0.0260396	0.00787663	-0.0198115	0.00975274	downstream	CRV2G00004623(dist=117)	CRV2G00004623	Protein of unknown function	0
unitig_41:286219	0.04542	0.01282	0.00552895	0.969395	0.0306046	0.00909227	0.0250757	0.00731705	0.0249504	0.0112873	intergenic	CRV2G00016400(dist=2642),CRV2G00016401(dist=15132)	CRV2G00016400	Protein of unknown function	0
unitig_105:215721	0.02357	0.007528	0.00389522	0.969284	0.030716	0.00911085	0.0268208	0.00826542	0.0161328	0.00782383	intergenic	CRV2G00018099(dist=1235),CRV2G00018100(dist=30214)	CRV2G00018099	Similar to TIC32 Short-chain dehydrogenase TIC 32, chloroplastic (Arabidopsis thaliana)	GO:0008152;GO:0016491
unitig_690:16761	0.03346	0.01013	0.00487096	0.968967	0.0310331	0.00912967	0.0261621	0.00793854	0.0214886	0.0103396	intergenic	CRV2G00019731(dist=12531),CRV2G00019732(dist=2026)	CRV2G00019731	Protein of unknown function	0
unitig_821:1891198	0.02725	0.008533	0.00432474	0.968939	0.0310613	0.00914848	0.0267365	0.00824992	0.0183956	0.00916291	intergenic	CRV2G00008512(dist=24333),CRV2G00008513(dist=1916)	CRV2G00008512	Similar to CHS8 Chitin synthase 8 (Ustilago maydis (strain 521 / FGSC 9021))	GO:0016758
unitig_332:3985	0.05775	0.01525	0.00613349	0.968903	0.031097	0.00916729	0.0249635	0.00730142	0.0275342	0.0131609	intergenic	NONE(dist=NONE),CRV2G00019989(dist=13033)	CRV2G00019989	Protein of unknown function	0
scf_014:981437	-0.03994	0.01166	0.968837	0.00534605	0.0311633	0.00918612	0.0258173	0.00767463	-0.0235853	0.0108842	intergenic	CRV2G00012293(dist=13434),CRV2G00012294(dist=17056)	CRV2G00012293	Protein of unknown function	GO:0005975;GO:0003824
scf_025:778301	0.03646	0.01086	0.00512278	0.968816	0.0311838	0.00920494	0.0260611	0.00789212	0.0225605	0.0106301	intronic	CRV2G00012743	CRV2G00012743	Similar to codA Choline oxidase (Arthrobacter globiformis)	GO:0055114;GO:0050660;GO:0016614
scf_025:778323	0.03646	0.01086	0.00512278	0.968816	0.0311838	0.00922372	0.0260611	0.00790759	0.0225605	0.0106301	intronic	CRV2G00012743	CRV2G00012743	Similar to codA Choline oxidase (Arthrobacter globiformis)	GO:0055114;GO:0050660;GO:0016614
unitig_818:289800	0.03388	0.01024	0.00493695	0.968789	0.0312112	0.0092425	0.0262742	0.00795411	0.0216375	0.0103912	exonic	CRV2G00017651	CRV2G00017651	Protein of unknown function	0
scf_001:3848223	-0.03229	0.009852	0.968605	0.00484228	0.031395	0.0092614	0.0265527	0.00807904	-0.0209651	0.0102029	intergenic	CRV2G00004612(dist=8554),CRV2G00004613(dist=15237)	CRV2G00004612	Protein of unknown function	GO:0055085;GO:0016021
scf_014:987022	-0.031	0.009526	0.968578	0.00473645	0.0314219	0.00928029	0.0266854	0.008219	-0.0203755	0.0100094	intergenic	CRV2G00012293(dist=19019),CRV2G00012294(dist=11471)	CRV2G00012293	Protein of unknown function	GO:0005975;GO:0003824
unitig_41:282530	0.031	0.009526	0.00473645	0.968578	0.0314219	0.00929915	0.0266854	0.00820353	0.0203755	0.0100094	downstream	CRV2G00016400(dist=264)	CRV2G00016400	Protein of unknown function	0
unitig_1:9828	0.03405	0.01029	0.00499181	0.968566	0.0314342	0.00931799	0.0264424	0.00800095	0.0216815	0.0104156	intronic	CRV2G00013438	CRV2G00013438	Protein of unknown function	GO:0016779
unitig_196:16718	0.02722	0.00854	0.00439688	0.968487	0.0315125	0.00933686	0.0271157	0.00828114	0.0183463	0.00916301	downstream	CRV2G00019377(dist=330)	CRV2G00019377	Protein of unknown function	0
unitig_200:35292	0.03386	0.01025	0.00501	0.968388	0.0316117	0.00935579	0.0266017	0.0081102	0.0215908	0.0104	intergenic	CRV2G00019728(dist=3610),CRV2G00019729(dist=1481)	CRV2G00019728	Protein of unknown function	0
unitig_659:34253	0.05864	0.01544	0.00628524	0.968367	0.0316335	0.0093747	0.0253482	0.00741079	0.0276653	0.013364	intergenic	CRV2G00019287(dist=5016),CRV2G00019288(dist=7973)	CRV2G00019287	Similar to hsp30 30 kDa heat shock protein (Emericella nidulans (strain FGSC A4 / ATCC 38163 / CBS 112.46 / NRRL 194 / M139))	0
unitig_659:34681	0.05864	0.01544	0.00628524	0.968367	0.0316335	0.00939358	0.0253482	0.00742647	0.0276653	0.013364	intergenic	CRV2G00019287(dist=5444),CRV2G00019288(dist=7545)	CRV2G00019287	Similar to hsp30 30 kDa heat shock protein (Emericella nidulans (strain FGSC A4 / ATCC 38163 / CBS 112.46 / NRRL 194 / M139))	0
unitig_659:34727	0.05864	0.01544	0.00628524	0.968367	0.0316335	0.00941243	0.0253482	0.00744212	0.0276653	0.013364	intergenic	CRV2G00019287(dist=5490),CRV2G00019288(dist=7499)	CRV2G00019287	Similar to hsp30 30 kDa heat shock protein (Emericella nidulans (strain FGSC A4 / ATCC 38163 / CBS 112.46 / NRRL 194 / M139))	0
unitig_659:34924	0.05864	0.01544	0.00628524	0.968367	0.0316335	0.00943124	0.0253482	0.00745775	0.0276653	0.013364	intergenic	CRV2G00019287(dist=5687),CRV2G00019288(dist=7302)	CRV2G00019287	Similar to hsp30 30 kDa heat shock protein (Emericella nidulans (strain FGSC A4 / ATCC 38163 / CBS 112.46 / NRRL 194 / M139))	0
unitig_659:35042	0.05864	0.01544	0.00628524	0.968367	0.0316335	0.00945002	0.0253482	0.00747335	0.0276653	0.013364	intergenic	CRV2G00019287(dist=5805),CRV2G00019288(dist=7184)	CRV2G00019287	Similar to hsp30 30 kDa heat shock protein (Emericella nidulans (strain FGSC A4 / ATCC 38163 / CBS 112.46 / NRRL 194 / M139))	0
unitig_659:35131	0.05864	0.01544	0.00628524	0.968367	0.0316335	0.00946878	0.0253482	0.00748892	0.0276653	0.013364	intergenic	CRV2G00019287(dist=5894),CRV2G00019288(dist=7095)	CRV2G00019287	Similar to hsp30 30 kDa heat shock protein (Emericella nidulans (strain FGSC A4 / ATCC 38163 / CBS 112.46 / NRRL 194 / M139))	0
unitig_659:35180	0.05864	0.01544	0.00628524	0.968367	0.0316335	0.0094875	0.0253482	0.00750446	0.0276653	0.013364	intergenic	CRV2G00019287(dist=5943),CRV2G00019288(dist=7046)	CRV2G00019287	Similar to hsp30 30 kDa heat shock protein (Emericella nidulans (strain FGSC A4 / ATCC 38163 / CBS 112.46 / NRRL 194 / M139))	0
unitig_659:35186	0.05864	0.01544	0.00628524	0.968367	0.0316335	0.00950619	0.0253482	0.00751998	0.0276653	0.013364	intergenic	CRV2G00019287(dist=5949),CRV2G00019288(dist=7040)	CRV2G00019287	Similar to hsp30 30 kDa heat shock protein (Emericella nidulans (strain FGSC A4 / ATCC 38163 / CBS 112.46 / NRRL 194 / M139))	0
unitig_659:35791	0.05864	0.01544	0.00628524	0.968367	0.0316335	0.00952484	0.0253482	0.00753546	0.0276653	0.013364	intergenic	CRV2G00019287(dist=6554),CRV2G00019288(dist=6435)	CRV2G00019287	Similar to hsp30 30 kDa heat shock protein (Emericella nidulans (strain FGSC A4 / ATCC 38163 / CBS 112.46 / NRRL 194 / M139))	0
unitig_659:35857	0.05864	0.01544	0.00628524	0.968367	0.0316335	0.00954347	0.0253482	0.00755093	0.0276653	0.013364	intergenic	CRV2G00019287(dist=6620),CRV2G00019288(dist=6369)	CRV2G00019287	Similar to hsp30 30 kDa heat shock protein (Emericella nidulans (strain FGSC A4 / ATCC 38163 / CBS 112.46 / NRRL 194 / M139))	0
unitig_659:36058	0.05864	0.01544	0.00628524	0.968367	0.0316335	0.00956206	0.0253482	0.00756636	0.0276653	0.013364	intergenic	CRV2G00019287(dist=6821),CRV2G00019288(dist=6168)	CRV2G00019287	Similar to hsp30 30 kDa heat shock protein (Emericella nidulans (strain FGSC A4 / ATCC 38163 / CBS 112.46 / NRRL 194 / M139))	0
unitig_659:53796	0.05864	0.01544	0.00628524	0.968367	0.0316335	0.00958063	0.0253482	0.00758177	0.0276653	0.013364	downstream	CRV2G00019292(dist=244)	CRV2G00019292	Similar to chit42 Endochitinase 42 (Trichoderma harzianum)	GO:0004568;GO:0004553;GO:0005975;GO:0003824;GO:0006032
unitig_659:53817	0.05864	0.01544	0.00628524	0.968367	0.0316335	0.00959916	0.0253482	0.00759715	0.0276653	0.013364	downstream	CRV2G00019292(dist=223)	CRV2G00019292	Similar to chit42 Endochitinase 42 (Trichoderma harzianum)	GO:0004568;GO:0004553;GO:0005975;GO:0003824;GO:0006032
unitig_105:175811	0.0394	0.01157	0.00547001	0.968048	0.0319522	0.00961793	0.0264822	0.00801658	0.0233544	0.010875	intergenic	CRV2G00018091(dist=1194),CRV2G00018092(dist=4823)	CRV2G00018091	Similar to cfp Pyruvate decarboxylase (Neurospora crassa (strain ATCC 24698 / 74-OR23-1A / CBS 708.71 / DSM 1257 / FGSC 987))	GO:0030976;GO:0003824;GO:0000287
scf_008:3743878	0.03166	0.009716	0.00490486	0.967964	0.0320364	0.00963673	0.0271316	0.00829685	0.0206275	0.010128	intergenic	CRV2G00001249(dist=6303),CRV2G00001250(dist=46707)	CRV2G00001249	Similar to NMA2 Nicotinamide/nicotinic acid mononucleotide adenylyltransferase 2 (Saccharomyces cerevisiae (strain ATCC 204508 / S288c))	GO:0003824;GO:0009058;GO:0009435;GO:0016779
unitig_690:18206	0.03845	0.01136	0.00544181	0.967878	0.0321216	0.00965558	0.0266798	0.00812582	0.0230709	0.0108127	upstream;downstream	CRV2G00019732(dist=581);CRV2G00019733(dist=581)	CRV2G00019732	Protein of unknown function	0
unitig_690:18215	0.03845	0.01136	0.00544181	0.967878	0.0321216	0.0096744	0.0266798	0.00814141	0.0230709	0.0108127	upstream;downstream	CRV2G00019732(dist=572);CRV2G00019733(dist=572)	CRV2G00019732	Protein of unknown function	0
scf_004:859694	0.04092	0.01192	0.00561134	0.967814	0.032186	0.00969323	0.0265747	0.00809463	0.0237269	0.0109919	downstream	CRV2G00010034(dist=53)	CRV2G00010034	Protein of unknown function	0
unitig_315:13685	0.03198	0.009811	0.00500415	0.967572	0.0324284	0.00971224	0.0274243	0.00836003	0.0207354	0.0101843	intergenic	CRV2G00020052(dist=4634),CRV2G00020053(dist=8841)	CRV2G00020052	Protein of unknown function	0
unitig_821:2231571	-0.02562	0.008139	0.967571	0.00438225	0.032429	0.00973122	0.0280468	0.00859887	-0.0173205	0.00866294	intergenic	CRV2G00008626(dist=6528),CRV2G00008627(dist=19520)	CRV2G00008626	Similar to azaF Acyl-CoA ligase azaF (Aspergillus niger (strain ATCC 1015 / CBS 113.46 / FGSC A1144 / LSHB Ac4 / NCTC 3858a / NRRL 328 / USDA 3528.7))	GO:0008152;GO:0003824
unitig_170:19135	0.02817	0.008824	0.00465062	0.967547	0.0324531	0.00975019	0.0278025	0.0084712	0.0188253	0.00944122	upstream	CRV2G00019607,CRV2G00019608(dist=358)	CRV2G00019607	Protein of unknown function	GO:0016772
unitig_105:231022	0.02618	0.008295	0.00446501	0.96743	0.0325705	0.00976922	0.0281055	0.00864674	0.0176539	0.00885833	intergenic	CRV2G00018099(dist=16536),CRV2G00018100(dist=14913)	CRV2G00018099	Similar to TIC32 Short-chain dehydrogenase TIC 32, chloroplastic (Arabidopsis thaliana)	GO:0008152;GO:0016491
unitig_723:26101	0.02715	0.008556	0.00456692	0.967428	0.032572	0.00978822	0.0280051	0.0085829	0.0182323	0.00916282	exonic	CRV2G00016667	CRV2G00016667	Protein of unknown function	0
unitig_41:284743	0.02906	0.009065	0.00477006	0.967365	0.0326345	0.00980725	0.0278645	0.00851905	0.0192975	0.0096585	intergenic	CRV2G00016400(dist=1166),CRV2G00016401(dist=16608)	CRV2G00016400	Protein of unknown function	0
unitig_756:373623	0.03483	0.01053	0.00530647	0.967223	0.0327775	0.00982636	0.027471	0.00837589	0.021841	0.0105324	intergenic	CRV2G00017425(dist=14261),CRV2G00017426(dist=2586)	CRV2G00017425	Protein of unknown function	0
unitig_756:373630	0.03483	0.01053	0.00530647	0.967223	0.0327775	0.00984543	0.027471	0.00839172	0.021841	0.0105324	intergenic	CRV2G00017425(dist=14268),CRV2G00017426(dist=2579)	CRV2G00017425	Protein of unknown function	0
unitig_659:54360	0.03079	0.00952	0.00496163	0.967214	0.0327856	0.00986449	0.0278239	0.00848716	0.0201583	0.0100041	exonic	CRV2G00019292	CRV2G00019292	Similar to chit42 Endochitinase 42 (Trichoderma harzianum)	GO:0004568;GO:0004553;GO:0005975;GO:0003824;GO:0006032
unitig_659:54366	0.03079	0.00952	0.00496163	0.967214	0.0327856	0.00988351	0.0278239	0.0085031	0.0201583	0.0100041	exonic	CRV2G00019292	CRV2G00019292	Similar to chit42 Endochitinase 42 (Trichoderma harzianum)	GO:0004568;GO:0004553;GO:0005975;GO:0003824;GO:0006032
unitig_269:6114	-0.02415	0.007753	0.967096	0.00429724	0.0329044	0.0099026	0.0286072	0.00882371	-0.0163828	0.00811126	intronic	CRV2G00021716	CRV2G00021716	Protein of unknown function	0
unitig_626:375312	0.02509	0.008013	0.00441851	0.96699	0.0330097	0.00992174	0.0285912	0.00880765	0.0169598	0.00848081	intergenic	CRV2G00017143(dist=1918),CRV2G00017144(dist=46901)	CRV2G00017143	Protein of unknown function	0
unitig_238:2897	0.02166	0.007072	0.00404018	0.966904	0.033096	0.00994093	0.0290558	0.00904866	0.0148635	0.00703584	upstream;downstream	CRV2G00020920(dist=893);CRV2G00020921(dist=57)	CRV2G00020920	Protein of unknown function	0
unitig_105:86718	0.03113	0.00962	0.0050593	0.966847	0.0331527	0.00996012	0.0280934	0.00861485	0.0202873	0.0100695	intronic	CRV2G00018066	CRV2G00018066	Protein of unknown function	0
unitig_105:86733	0.03113	0.00962	0.0050593	0.966847	0.0331527	0.00997929	0.0280934	0.0086308	0.0202873	0.0100695	intronic	CRV2G00018066	CRV2G00018066	Protein of unknown function	0
unitig_595:40266	0.06588	0.01682	0.00690476	0.966703	0.0332974	0.00999855	0.0263926	0.00798532	0.0291758	0.0150433	upstream	CRV2G00019129(dist=335)	CRV2G00019129	Protein of unknown function	GO:0003677
unitig_785:9080	0.06794	0.01718	0.00697166	0.966683	0.0333167	0.0100178	0.026345	0.0079697	0.029696	0.0155281	intergenic	NONE(dist=NONE),CRV2G00019352(dist=14169)	CRV2G00019352	Protein of unknown function	0
unitig_699:6558	-0.059	0.01559	0.966622	0.00669617	0.0333783	0.010037	0.0266821	0.00815698	-0.0275106	0.0134879	intergenic	NONE(dist=NONE),CRV2G00019615(dist=3740)	CRV2G00019615	Protein of unknown function	GO:0055114;GO:0016491
unitig_699:6565	-0.059	0.01559	0.966622	0.00669617	0.0333783	0.0100563	0.0266821	0.00817252	-0.0275106	0.0134879	intergenic	NONE(dist=NONE),CRV2G00019615(dist=3733)	CRV2G00019615	Protein of unknown function	GO:0055114;GO:0016491
unitig_699:6614	-0.059	0.01559	0.966622	0.00669617	0.0333783	0.0100755	0.0266821	0.00818804	-0.0275106	0.0134879	intergenic	NONE(dist=NONE),CRV2G00019615(dist=3684)	CRV2G00019615	Protein of unknown function	GO:0055114;GO:0016491
unitig_659:59542	0.04414	0.01267	0.00605321	0.966577	0.0334233	0.0100947	0.0273701	0.00834418	0.0243488	0.0112898	intergenic	CRV2G00019292(dist=4105),CRV2G00019293(dist=3398)	CRV2G00019292	Similar to chit42 Endochitinase 42 (Trichoderma harzianum)	GO:0004568;GO:0004553;GO:0005975;GO:0003824;GO:0006032
unitig_585:279512	0.04872	0.01362	0.0062939	0.966546	0.0334539	0.0101139	0.02716	0.00831256	0.0253141	0.0117579	intergenic	CRV2G00018187(dist=2136),NONE(dist=NONE)	CRV2G00018187	Protein of unknown function	0
unitig_643:70935	0.04771	0.01342	0.00627002	0.966432	0.033568	0.0101331	0.027298	0.00832835	0.0250928	0.011645	intergenic	CRV2G00019327(dist=11987),NONE(dist=NONE)	CRV2G00019327	Similar to betA Oxygen-dependent choline dehydrogenase (Burkholderia multivorans (strain ATCC 17616 / 249))	GO:0055114;GO:0050660;GO:0006066;GO:0016614;GO:0008812
unitig_55:6276	-0.0306	0.009498	0.966429	0.005085	0.0335713	0.0101523	0.0284863	0.00872712	-0.0200018	0.00998722	exonic	CRV2G00021188	CRV2G00021188	Similar to SPBC1683.12 Uncharacterized transporter C1683.12 (Schizosaccharomyces pombe (strain 972 / ATCC 24843))	GO:0055085;GO:0016021
unitig_170:19142	0.02753	0.008701	0.00483384	0.966087	0.0339132	0.0101718	0.0290793	0.00908072	0.0183605	0.00929708	upstream	CRV2G00019608(dist=351)	CRV2G00019608	Protein of unknown function	0
unitig_56:10825	-0.02312	0.007501	0.966029	0.00434515	0.0339715	0.0101913	0.0296263	0.00916172	-0.0156967	0.00770072	intergenic	CRV2G00020548(dist=6022),CRV2G00020549(dist=3208)	CRV2G00020548	Protein of unknown function	0
unitig_227:50303	0.04704	0.0133	0.00632479	0.966023	0.0339768	0.0102108	0.027652	0.00843931	0.0249075	0.0115882	intronic	CRV2G00019646	CRV2G00019646	Protein of unknown function	GO:0005576
unitig_391:6093	0.03186	0.009835	0.00527828	0.966017	0.0339825	0.0102302	0.0287042	0.00883982	0.020546	0.0102022	intergenic	CRV2G00021626(dist=1151),CRV2G00021627(dist=1833)	CRV2G00021626	Protein of unknown function	0
unitig_595:68234	-0.03036	0.00945	0.966012	0.00513682	0.0339883	0.0102496	0.0288515	0.00900047	-0.0198519	0.00995195	intergenic	CRV2G00019136(dist=7602),CRV2G00019137(dist=3525)	CRV2G00019136	Protein of unknown function	0
unitig_105:84813	0.0288	0.009042	0.00498324	0.965994	0.0340057	0.010269	0.0290225	0.0090326	0.0190551	0.00962529	intergenic	CRV2G00018065(dist=8327),CRV2G00018066(dist=1476)	CRV2G00018065	Protein of unknown function	0
unitig_658:715140	0.032	0.009872	0.00529891	0.965976	0.0340244	0.0102884	0.0287255	0.00885592	0.0206035	0.0102237	intergenic	CRV2G00014350(dist=13863),CRV2G00014351(dist=4562)	CRV2G00014350	Protein of unknown function	GO:0000981;GO:0006355;GO:0005634;GO:0008270
unitig_691:52855	0.03697	0.01109	0.00572256	0.965927	0.0340733	0.0103078	0.0283507	0.00867891	0.0224293	0.0107609	intergenic	CRV2G00019574(dist=2014),CRV2G00019575(dist=1030)	CRV2G00019574	Similar to GAL80 Galactose/lactose metabolism regulatory protein GAL80 (Saccharomyces cerevisiae (strain ATCC 204508 / S288c))	GO:0016491
unitig_691:52862	0.03697	0.01109	0.00572256	0.965927	0.0340733	0.0103271	0.0283507	0.00869497	0.0224293	0.0107609	intergenic	CRV2G00019574(dist=2021),CRV2G00019575(dist=1023)	CRV2G00019574	Similar to GAL80 Galactose/lactose metabolism regulatory protein GAL80 (Saccharomyces cerevisiae (strain ATCC 204508 / S288c))	GO:0016491
unitig_691:52872	0.03697	0.01109	0.00572256	0.965927	0.0340733	0.0103465	0.0283507	0.008711	0.0224293	0.0107609	intergenic	CRV2G00019574(dist=2031),CRV2G00019575(dist=1013)	CRV2G00019574	Similar to GAL80 Galactose/lactose metabolism regulatory protein GAL80 (Saccharomyces cerevisiae (strain ATCC 204508 / S288c))	GO:0016491
unitig_699:55863	0.02948	0.009228	0.00508978	0.965784	0.0342156	0.0103659	0.0291258	0.00909676	0.0193949	0.00978121	upstream;downstream	CRV2G00019632(dist=211);CRV2G00019633(dist=916)	CRV2G00019632	Similar to CIMG_07933 Putative triosephosphate isomerase (Coccidioides immitis (strain RS))	GO:0004807;GO:0008152;GO:0003824
unitig_818:61098	0.0455	0.01299	0.00629544	0.965784	0.0342158	0.0103852	0.0279203	0.00853502	0.0245568	0.011443	upstream	CRV2G00017600(dist=213)	CRV2G00017600	Protein of unknown function	0
unitig_818:61148	0.0455	0.01299	0.00629544	0.965784	0.0342158	0.0104046	0.0279203	0.00855096	0.0245568	0.011443	upstream	CRV2G00017600(dist=163)	CRV2G00017600	Protein of unknown function	0
scf_003:411075	0.06225	0.01624	0.00709918	0.965374	0.0346264	0.0104242	0.0275272	0.00840758	0.0280939	0.0142247	intergenic	CRV2G00007051(dist=15310),CRV2G00007052(dist=49205)	CRV2G00007051	Protein of unknown function	0
scf_003:411159	0.06225	0.01624	0.00709918	0.965374	0.0346264	0.0104438	0.0275272	0.0084234	0.0280939	0.0142247	intergenic	CRV2G00007051(dist=15394),CRV2G00007052(dist=49121)	CRV2G00007051	Protein of unknown function	0
unitig_196:18255	0.03426	0.01046	0.00562568	0.965305	0.0346948	0.0104635	0.0290691	0.0090647	0.0214511	0.010524	exonic	CRV2G00019378	CRV2G00019378	Protein of unknown function	0
unitig_106:7225	0.04254	0.01238	0.00624587	0.965213	0.0347868	0.0104831	0.0285409	0.00874325	0.0238386	0.0112095	intergenic	CRV2G00021918(dist=4827),NONE(dist=NONE)	CRV2G00021918	Protein of unknown function	0
unitig_200:26490	0.0537	0.01466	0.00681754	0.965186	0.0348143	0.0105028	0.0279968	0.00856694	0.0261773	0.0125256	downstream	CRV2G00019727(dist=977)	CRV2G00019727	Protein of unknown function	0
unitig_630:14363	0.06631	0.01698	0.00732651	0.964981	0.0350188	0.0105226	0.0276923	0.00845522	0.029018	0.0151578	intergenic	CRV2G00019736(dist=11253),CRV2G00019737(dist=6136)	CRV2G00019736	Protein of unknown function	0
unitig_105:85929	0.022	0.007221	0.00437774	0.964925	0.0350749	0.0105424	0.0306972	0.00936137	0.0149807	0.00723195	downstream	CRV2G00018066(dist=360)	CRV2G00018066	Protein of unknown function	0
unitig_659:58269	0.02504	0.008063	0.00475493	0.964881	0.0351193	0.0105623	0.0303644	0.00931073	0.0168119	0.00850211	intergenic	CRV2G00019292(dist=2832),CRV2G00019293(dist=4671)	CRV2G00019292	Similar to chit42 Endochitinase 42 (Trichoderma harzianum)	GO:0004568;GO:0004553;GO:0005975;GO:0003824;GO:0006032
scf_014:984417	-0.02961	0.009294	0.964813	0.00527615	0.0351867	0.0105821	0.0299106	0.00917825	-0.0193865	0.00982718	intergenic	CRV2G00012293(dist=16414),CRV2G00012294(dist=14076)	CRV2G00012293	Protein of unknown function	GO:0005975;GO:0003824
unitig_823:634552	-0.05417	0.01477	0.96474	0.00693813	0.03526	0.010602	0.0283219	0.00866282	-0.0262216	0.0126199	intergenic	CRV2G00015724(dist=9255),NONE(dist=NONE)	CRV2G00015724	Similar to FUS6 Efflux pump FUS6 (Gibberella moniliformis (strain M3125 / FGSC 7600))	GO:0055085;GO:0016021
scf_024:212613	-0.03341	0.01027	0.964722	0.00566211	0.0352778	0.0106218	0.0296157	0.00914539	-0.0210747	0.0104404	downstream	CRV2G00013128,CRV2G00013129(dist=25)	CRV2G00013128	Protein of unknown function	0
unitig_595:42878	0.039	0.01161	0.00612834	0.964644	0.0353558	0.0106417	0.0292275	0.00911285	0.0228916	0.0109595	UTR3	CRV2G00019130(CRV2T00019130_1:c.*281G>A)	CRV2G00019130	Similar to paqr-1 Progestin and adipoQ receptor-like protein 1 (Caenorhabditis elegans)	GO:0016021
unitig_339:10001	0.04325	0.01256	0.00642666	0.964559	0.0354408	0.0106616	0.0290142	0.00901654	0.0239318	0.0112904	intergenic	NONE(dist=NONE),NONE(dist=NONE)		#N/A	#N/A
unitig_502:6304	0.0385	0.0115	0.00612017	0.964505	0.0354948	0.0106816	0.0293746	0.00912904	0.0227392	0.0109254	intergenic	NONE(dist=NONE),NONE(dist=NONE)		#N/A	#N/A
unitig_41:33687	0.0223	0.007319	0.00449582	0.964398	0.0356017	0.0107015	0.0311059	0.00956332	0.0151345	0.00737633	upstream	CRV2G00016356(dist=683)	CRV2G00016356	Protein of unknown function	0
unitig_332:3976	0.05606	0.01516	0.00717244	0.964058	0.0359425	0.0107218	0.02877	0.00887203	0.0265362	0.0129774	intergenic	NONE(dist=NONE),CRV2G00019989(dist=13042)	CRV2G00019989	Protein of unknown function	0
unitig_196:52994	0.06272	0.01639	0.00744264	0.963983	0.0360167	0.010742	0.028574	0.00875939	0.0280106	0.0143528	intergenic	CRV2G00019383(dist=4948),CRV2G00019384(dist=3630)	CRV2G00019383	Protein of unknown function	0
unitig_196:53012	0.06272	0.01639	0.00744264	0.963983	0.0360167	0.0107622	0.028574	0.0087755	0.0280106	0.0143528	intergenic	CRV2G00019383(dist=4966),CRV2G00019384(dist=3612)	CRV2G00019383	Protein of unknown function	0
unitig_196:53449	0.06272	0.01639	0.00744264	0.963983	0.0360167	0.0107824	0.028574	0.00879158	0.0280106	0.0143528	intergenic	CRV2G00019383(dist=5403),CRV2G00019384(dist=3175)	CRV2G00019383	Protein of unknown function	0
scf_003:157314	-0.02542	0.008195	0.96394	0.00495512	0.0360599	0.0108026	0.0311048	0.00954645	-0.0169892	0.00865895	downstream	CRV2G00006988(dist=629)	CRV2G00006988	Similar to Kinesin light chain (Doryteuthis pealeii)	GO:0005871;GO:0005515;GO:0003777
scf_001:3897853	-0.02837	0.008994	0.96393	0.00529941	0.0360696	0.0108228	0.0307702	0.00944554	-0.0186763	0.00955865	downstream	CRV2G00004620(dist=201)	CRV2G00004620	Similar to ppoA Psi-producing oxygenase A (Neosartorya fumigata (strain CEA10 / CBS 144.89 / FGSC A1163))	GO:0055114;GO:0006979;GO:0004601;GO:0020037
scf_003:146472	0.05975	0.01586	0.00738338	0.963774	0.0362261	0.010843	0.0288427	0.00888818	0.0273037	0.0137146	downstream	CRV2G00006984(dist=22)	CRV2G00006984	Similar to OLE1 Acyl-CoA desaturase (Ajellomyces capsulatus)	GO:0005783;GO:0016717;GO:0004768;GO:0006629;GO:0055114;GO:0006633;GO:0020037;GO:0016020;GO:0005506
scf_003:146492	0.05975	0.01586	0.00738338	0.963774	0.0362261	0.0108633	0.0288427	0.0089043	0.0273037	0.0137146	downstream	CRV2G00006984(dist=2)	CRV2G00006984	Similar to OLE1 Acyl-CoA desaturase (Ajellomyces capsulatus)	GO:0005783;GO:0016717;GO:0004768;GO:0006629;GO:0055114;GO:0006633;GO:0020037;GO:0016020;GO:0005506
scf_003:146511	0.05975	0.01586	0.00738338	0.963774	0.0362261	0.0108835	0.0288427	0.00892039	0.0273037	0.0137146	UTR3	CRV2G00006984(CRV2T00006984_1:c.*204C>A)	CRV2G00006984	Similar to OLE1 Acyl-CoA desaturase (Ajellomyces capsulatus)	GO:0005783;GO:0016717;GO:0004768;GO:0006629;GO:0055114;GO:0006633;GO:0020037;GO:0016020;GO:0005506
scf_003:146550	0.05975	0.01586	0.00738338	0.963774	0.0362261	0.0109036	0.0288427	0.00893645	0.0273037	0.0137146	UTR3	CRV2G00006984(CRV2T00006984_1:c.*165A>C)	CRV2G00006984	Similar to OLE1 Acyl-CoA desaturase (Ajellomyces capsulatus)	GO:0005783;GO:0016717;GO:0004768;GO:0006629;GO:0055114;GO:0006633;GO:0020037;GO:0016020;GO:0005506
scf_003:146613	0.05975	0.01586	0.00738338	0.963774	0.0362261	0.0109237	0.0288427	0.0089525	0.0273037	0.0137146	UTR3	CRV2G00006984(CRV2T00006984_1:c.*102A>C)	CRV2G00006984	Similar to OLE1 Acyl-CoA desaturase (Ajellomyces capsulatus)	GO:0005783;GO:0016717;GO:0004768;GO:0006629;GO:0055114;GO:0006633;GO:0020037;GO:0016020;GO:0005506
scf_003:146629	0.05975	0.01586	0.00738338	0.963774	0.0362261	0.0109438	0.0288427	0.00896851	0.0273037	0.0137146	UTR3	CRV2G00006984(CRV2T00006984_1:c.*86A>T)	CRV2G00006984	Similar to OLE1 Acyl-CoA desaturase (Ajellomyces capsulatus)	GO:0005783;GO:0016717;GO:0004768;GO:0006629;GO:0055114;GO:0006633;GO:0020037;GO:0016020;GO:0005506
scf_003:147582	0.05975	0.01586	0.00738338	0.963774	0.0362261	0.0109639	0.0288427	0.0089845	0.0273037	0.0137146	exonic	CRV2G00006984	CRV2G00006984	Similar to OLE1 Acyl-CoA desaturase (Ajellomyces capsulatus)	GO:0005783;GO:0016717;GO:0004768;GO:0006629;GO:0055114;GO:0006633;GO:0020037;GO:0016020;GO:0005506
unitig_586:8393	0.0391	0.01167	0.00633893	0.963646	0.0363538	0.010984	0.0300148	0.0092114	0.0228191	0.010998	intergenic	NONE(dist=NONE),NONE(dist=NONE)		#N/A	#N/A
unitig_586:8408	0.0391	0.01167	0.00633893	0.963646	0.0363538	0.0110041	0.0300148	0.00922794	0.0228191	0.010998	intergenic	NONE(dist=NONE),NONE(dist=NONE)		#N/A	#N/A
unitig_586:8437	0.0391	0.01167	0.00633893	0.963646	0.0363538	0.0110242	0.0300148	0.00924445	0.0228191	0.010998	intergenic	NONE(dist=NONE),NONE(dist=NONE)		#N/A	#N/A
unitig_586:8458	0.0391	0.01167	0.00633893	0.963646	0.0363538	0.0110443	0.0300148	0.00926094	0.0228191	0.010998	intergenic	NONE(dist=NONE),NONE(dist=NONE)		#N/A	#N/A
unitig_586:8481	0.0391	0.01167	0.00633893	0.963646	0.0363538	0.0110643	0.0300148	0.00927739	0.0228191	0.010998	intergenic	NONE(dist=NONE),NONE(dist=NONE)		#N/A	#N/A
scf_005:4701339	0.02743	0.008752	0.00525023	0.963601	0.0363987	0.0110843	0.0311484	0.0095802	0.0181382	0.00931306	intergenic	CRV2G00003316(dist=6076),CRV2G00003317(dist=31046)	CRV2G00003316	Similar to MexAM1_META1p0182 Uncharacterized oxidoreductase MexAM1_META1p0182 (Methylobacterium extorquens (strain ATCC 14718 / DSM 1338 / JCM 2805 / NCIMB 9133 / AM1))	GO:0008152;GO:0016491
unitig_658:155356	0.02354	0.007686	0.0047775	0.963601	0.0363987	0.0111043	0.0316212	0.00964812	0.0158381	0.00792859	exonic	CRV2G00014140	CRV2G00014140	Protein of unknown function	0
unitig_41:33673	0.01985	0.006653	0.00430783	0.963489	0.0365112	0.0111243	0.0322033	0.0098201	0.0137429	0.00632154	upstream	CRV2G00016356(dist=669)	CRV2G00016356	Protein of unknown function	0
unitig_152:1874	0.02883	0.009134	0.00544901	0.963375	0.036625	0.0111444	0.031176	0.00959707	0.0188805	0.00968014	intergenic	NONE(dist=NONE),CRV2G00019467(dist=11833)	CRV2G00019467	Similar to NMRAL1 NmrA-like family domain-containing protein 1 (Gallus gallus)	0
unitig_333:197328	0.03956	0.01179	0.00645434	0.963248	0.0367521	0.0111645	0.0302977	0.00929405	0.0229022	0.0110457	intergenic	CRV2G00018666(dist=18264),CRV2G00018668(dist=14388)	CRV2G00018666	Protein of unknown function	GO:0003676;GO:0046872
scf_025:750839	0.01742	0.005957	0.00399608	0.963206	0.0367939	0.0111847	0.0327978	0.0101489	0.0125716	0.0054013	exonic	CRV2G00012734	CRV2G00012734	Similar to PGC Gastricsin (Callithrix jacchus)	GO:0004190;GO:0006508
scf_003:447513	0.036	0.01096	0.0061984	0.963128	0.0368722	0.0112049	0.0306738	0.00934451	0.0218521	0.0107539	intergenic	CRV2G00007051(dist=51748),CRV2G00007052(dist=12767)	CRV2G00007051	Protein of unknown function	0
scf_003:2829540	0.01437	0.005029	0.00350385	0.96309	0.0369103	0.0112251	0.0334065	0.0103747	0.0112556	0.00454438	upstream;downstream	CRV2G00007787(dist=392);CRV2G00007788(dist=289)	CRV2G00007787	Protein of unknown function	0
unitig_785:99724	0.02444	0.007952	0.00498657	0.963012	0.0369876	0.0112453	0.0320011	0.00978543	0.0163513	0.00830601	intergenic	CRV2G00019371(dist=3936),NONE(dist=NONE)	CRV2G00019371	Similar to yfcG Disulfide-bond oxidoreductase YfcG (Escherichia coli (strain K12))	GO:0005515
unitig_337:5251	-0.03501	0.01073	0.962839	0.00616936	0.0371613	0.0112656	0.030992	0.00952955	-0.0214937	0.0106643	exonic	CRV2G00021798	CRV2G00021798	Protein of unknown function	0
scf_005:4778352	0.03696	0.0112	0.00633842	0.962828	0.0371722	0.011286	0.0308338	0.00946236	0.0221259	0.010848	intergenic	CRV2G00003324(dist=5218),CRV2G00003325(dist=3730)	CRV2G00003324	Protein of unknown function	0
unitig_105:85496	0.02154	0.007149	0.00464251	0.962786	0.0372143	0.0113063	0.0325718	0.0100277	0.0146321	0.00707375	downstream	CRV2G00018066(dist=793)	CRV2G00018066	Protein of unknown function	0
unitig_96:10926	0.02473	0.00804	0.0050685	0.962737	0.0372629	0.0113266	0.0321944	0.00980278	0.0165113	0.0084237	intergenic	CRV2G00020319(dist=3184),CRV2G00020320(dist=9673)	CRV2G00020319	Protein of unknown function	GO:0008152;GO:0016491
unitig_823:633610	-0.041	0.01214	0.962589	0.00669412	0.037411	0.011347	0.0307169	0.00937823	-0.0232015	0.0111776	intergenic	CRV2G00015724(dist=8313),NONE(dist=NONE)	CRV2G00015724	Similar to FUS6 Efflux pump FUS6 (Gibberella moniliformis (strain M3125 / FGSC 7600))	GO:0055085;GO:0016021
scf_022:3343625	-0.03975	0.01186	0.962522	0.00661821	0.0374782	0.0113674	0.03086	0.00949594	-0.0228801	0.0110826	intergenic	CRV2G00005812(dist=3715),CRV2G00005813(dist=2334)	CRV2G00005812	Protein of unknown function	0
scf_003:3155516	0.03283	0.0102	0.0060315	0.962496	0.037504	0.0113878	0.0314725	0.00963098	0.0206518	0.0104157	intergenic	CRV2G00007904(dist=2805),NONE(dist=NONE)	CRV2G00007904	Protein of unknown function	0
unitig_821:1891115	0.02365	0.007751	0.00499025	0.962361	0.0376392	0.0114083	0.0326489	0.010045	0.0158463	0.00799834	intergenic	CRV2G00008512(dist=24250),CRV2G00008513(dist=1999)	CRV2G00008512	Similar to CHS8 Chitin synthase 8 (Ustilago maydis (strain 521 / FGSC 9021))	GO:0016758
unitig_34:4291	-0.016	0.005553	0.962212	0.00389755	0.0377879	0.0114288	0.0338904	0.0105322	-0.0119292	0.0049857	upstream;downstream	CRV2G00020327(dist=450);CRV2G00020325,CRV2G00020326(dist=383)	CRV2G00020327	Protein of unknown function	GO:0008081;GO:0046872
unitig_45:537	-0.04825	0.01371	0.962079	0.00725131	0.0379215	0.0114495	0.0306702	0.00932763	-0.0247218	0.0118691	exonic	CRV2G00020507	CRV2G00020507	Protein of unknown function	GO:0004713;GO:0016772;GO:0005524;GO:0006468;GO:0004672
scf_005:4719401	0.0246	0.008025	0.00517388	0.961996	0.0380035	0.0114701	0.0328297	0.0101662	0.0163959	0.00838686	intergenic	CRV2G00003316(dist=24138),CRV2G00003317(dist=12984)	CRV2G00003316	Similar to MexAM1_META1p0182 Uncharacterized oxidoreductase MexAM1_META1p0182 (Methylobacterium extorquens (strain ATCC 14718 / DSM 1338 / JCM 2805 / NCIMB 9133 / AM1))	GO:0008152;GO:0016491
scf_005:4719407	0.0246	0.008025	0.00517388	0.961996	0.0380035	0.0114907	0.0328297	0.0101834	0.0163959	0.00838686	intergenic	CRV2G00003316(dist=24144),CRV2G00003317(dist=12978)	CRV2G00003316	Similar to MexAM1_META1p0182 Uncharacterized oxidoreductase MexAM1_META1p0182 (Methylobacterium extorquens (strain ATCC 14718 / DSM 1338 / JCM 2805 / NCIMB 9133 / AM1))	GO:0008152;GO:0016491
scf_003:419831	0.065	0.01689	0.00799944	0.961987	0.0380135	0.0115114	0.0300141	0.00919484	0.0282659	0.0148866	intergenic	CRV2G00007051(dist=24066),CRV2G00007052(dist=40449)	CRV2G00007051	Protein of unknown function	0
unitig_821:246333	0.04615	0.01328	0.00716112	0.96195	0.0380503	0.011532	0.0308892	0.00951272	0.0242811	0.0116466	intergenic	CRV2G00007970(dist=32363),CRV2G00007971(dist=24139)	CRV2G00007970	Protein of unknown function	GO:0016758;GO:0005975;GO:0016020
unitig_690:28443	0.03543	0.01087	0.00642325	0.961743	0.0382567	0.0115527	0.0318335	0.00973383	0.0215376	0.0107335	intergenic	CRV2G00019735(dist=5811),NONE(dist=NONE)	CRV2G00019735	Protein of unknown function	0
unitig_1:93516	0.02273	0.007513	0.00497943	0.961656	0.0383438	0.0115735	0.0333643	0.0103399	0.0152714	0.00762075	upstream	CRV2G00013464(dist=567)	CRV2G00013464	Protein of unknown function	0
unitig_1:93558	0.02273	0.007513	0.00497943	0.961656	0.0383438	0.0115942	0.0333643	0.0103573	0.0152714	0.00762075	upstream	CRV2G00013464(dist=609)	CRV2G00013464	Protein of unknown function	0
scf_001:10701	0.02385	0.007828	0.00514217	0.961586	0.0384142	0.011615	0.0332721	0.0102876	0.0159294	0.0080953	intergenic	NONE(dist=NONE),CRV2G00003338(dist=10043)	CRV2G00003338	Protein of unknown function	0
unitig_251:15546	0.03275	0.01021	0.00619899	0.96158	0.0384205	0.0116357	0.0322215	0.00985469	0.020543	0.010424	intergenic	CRV2G00016834(dist=12034),CRV2G00016835(dist=4041)	CRV2G00016834	Protein of unknown function	0
scf_005:4719393	0.02781	0.008916	0.00564952	0.961578	0.0384216	0.0116564	0.032772	0.0101144	0.018216	0.00945273	intergenic	CRV2G00003316(dist=24130),CRV2G00003317(dist=12992)	CRV2G00003316	Similar to MexAM1_META1p0182 Uncharacterized oxidoreductase MexAM1_META1p0182 (Methylobacterium extorquens (strain ATCC 14718 / DSM 1338 / JCM 2805 / NCIMB 9133 / AM1))	GO:0008152;GO:0016491
unitig_105:234877	0.02937	0.009337	0.00585462	0.961464	0.0385362	0.0116771	0.0326815	0.0100624	0.0190192	0.00983597	intergenic	CRV2G00018099(dist=20391),CRV2G00018100(dist=11058)	CRV2G00018099	Similar to TIC32 Short-chain dehydrogenase TIC 32, chloroplastic (Arabidopsis thaliana)	GO:0008152;GO:0016491
scf_005:4825846	0.03106	0.009781	0.00604715	0.961446	0.038554	0.0116979	0.0325068	0.0100104	0.0198166	0.010166	intergenic	CRV2G00003334(dist=5169),CRV2G00003335(dist=14190)	CRV2G00003334	Protein of unknown function	0
unitig_697:193303	0.02422	0.007935	0.00521531	0.961441	0.0385593	0.0117186	0.033344	0.010305	0.0161424	0.00824745	intergenic	CRV2G00018416(dist=5167),CRV2G00018417(dist=2429)	CRV2G00018416	Similar to tsc10 3-ketodihydrosphingosine reductase tsc10 (Emericella nidulans (strain FGSC A4 / ATCC 38163 / CBS 112.46 / NRRL 194 / M139))	GO:0008152;GO:0016491
unitig_697:193304	0.02422	0.007935	0.00521531	0.961441	0.0385593	0.0117393	0.033344	0.0103224	0.0161424	0.00824745	intergenic	CRV2G00018416(dist=5168),CRV2G00018417(dist=2428)	CRV2G00018416	Similar to tsc10 3-ketodihydrosphingosine reductase tsc10 (Emericella nidulans (strain FGSC A4 / ATCC 38163 / CBS 112.46 / NRRL 194 / M139))	GO:0008152;GO:0016491
unitig_266:94698	0.02254	0.007468	0.00500312	0.961341	0.0386592	0.01176	0.0336561	0.0104446	0.0151476	0.00754439	upstream;downstream	CRV2G00019466(dist=266);CRV2G00019465(dist=860)	CRV2G00019466	Similar to CIMG_07933 Putative triosephosphate isomerase (Coccidioides immitis (strain RS))	GO:0004807;GO:0008152;GO:0003824
unitig_701:138238	-0.03347	0.0104	0.96132	0.00632117	0.0386802	0.0117807	0.0323591	0.00988939	-0.0208019	0.0105238	exonic	CRV2G00018826	CRV2G00018826	Protein of unknown function	GO:0003676;GO:0003677
scf_004:617476	-0.04253	0.01253	0.961232	0.0070873	0.0387684	0.0118014	0.0316811	0.00966528	-0.0234265	0.0113432	intergenic	CRV2G00009988(dist=1645),CRV2G00009989(dist=56674)	CRV2G00009988	Protein of unknown function	0
unitig_41:62700	0.0405	0.01208	0.00695871	0.961156	0.0388441	0.0118222	0.0318854	0.00975101	0.0229369	0.0111824	intergenic	CRV2G00016356(dist=29696),CRV2G00016357(dist=3642)	CRV2G00016356	Protein of unknown function	0
unitig_818:350766	0.05356	0.01481	0.00775247	0.961053	0.0389472	0.011843	0.0311948	0.00961393	0.0256683	0.012637	intergenic	CRV2G00017664(dist=2253),CRV2G00017665(dist=3350)	CRV2G00017664	Protein of unknown function	0
unitig_595:30846	0.06392	0.01674	0.00818668	0.961046	0.0389544	0.0118638	0.0307677	0.0093951	0.0278865	0.0146583	upstream	CRV2G00019127(dist=952)	CRV2G00019127	Protein of unknown function	0
unitig_595:30899	0.06392	0.01674	0.00818668	0.961046	0.0389544	0.0118846	0.0307677	0.00941194	0.0278865	0.0146583	intergenic	CRV2G00019127(dist=1005),CRV2G00019128(dist=3952)	CRV2G00019127	Protein of unknown function	0
unitig_595:30972	0.06392	0.01674	0.00818668	0.961046	0.0389544	0.0119053	0.0307677	0.00942875	0.0278865	0.0146583	intergenic	CRV2G00019127(dist=1078),CRV2G00019128(dist=3879)	CRV2G00019127	Protein of unknown function	0
unitig_41:298593	0.03092	0.009758	0.00611087	0.961024	0.0389759	0.011926	0.0328651	0.0102007	0.0197212	0.0101493	intergenic	CRV2G00016400(dist=15016),CRV2G00016401(dist=2758)	CRV2G00016400	Protein of unknown function	0
unitig_105:26210	0.022	0.007325	0.00498219	0.960993	0.0390074	0.0119467	0.0340252	0.0105672	0.0148234	0.00731459	intergenic	CRV2G00018053(dist=4497),CRV2G00018054(dist=1324)	CRV2G00018053	Protein of unknown function	0
unitig_105:26258	0.022	0.007325	0.00498219	0.960993	0.0390074	0.0119674	0.0340252	0.0105848	0.0148234	0.00731459	intergenic	CRV2G00018053(dist=4545),CRV2G00018054(dist=1276)	CRV2G00018053	Protein of unknown function	0
unitig_196:16510	0.0454	0.01316	0.00733247	0.960961	0.0390392	0.0119881	0.0317067	0.00968243	0.0240229	0.0116064	downstream	CRV2G00019377(dist=122)	CRV2G00019377	Protein of unknown function	0
unitig_196:16876	0.0454	0.01316	0.00733247	0.960961	0.0390392	0.0120087	0.0317067	0.00969956	0.0240229	0.0116064	downstream	CRV2G00019377(dist=488)	CRV2G00019377	Protein of unknown function	0
unitig_196:16894	0.0454	0.01316	0.00733247	0.960961	0.0390392	0.0120293	0.0317067	0.00971666	0.0240229	0.0116064	downstream	CRV2G00019377,CRV2G00019378(dist=990)	CRV2G00019377	Protein of unknown function	0
unitig_842:18492	-0.03042	0.009631	0.960911	0.00607618	0.0390889	0.0120499	0.0330127	0.010218	-0.0194839	0.0100598	downstream	CRV2G00020023,CRV2G00020024(dist=53)	CRV2G00020023	Protein of unknown function	0
unitig_659:86389	0.06511	0.01696	0.00827028	0.96088	0.0391199	0.0120705	0.0308496	0.00947916	0.0281376	0.0149216	intergenic	CRV2G00019298(dist=6707),CRV2G00019299(dist=6854)	CRV2G00019298	Protein of unknown function	0
unitig_19:8681	0.03	0.009526	0.00606031	0.960739	0.0392612	0.0120912	0.0332009	0.0102701	0.0192736	0.00998076	intergenic	CRV2G00021946(dist=7795),CRV2G00021947(dist=3708)	CRV2G00021946	Protein of unknown function	0
unitig_122:6117	0.01942	0.006596	0.00464366	0.960734	0.0392655	0.0121118	0.0346219	0.0109181	0.0134358	0.00620513	intergenic	CRV2G00022200(dist=1846),CRV2G00022201(dist=1688)	CRV2G00022200	Protein of unknown function	0
unitig_313:6939	-0.02587	0.008412	0.96072	0.00555432	0.0392795	0.0121325	0.0337252	0.0104621	-0.0170753	0.00887239	upstream	CRV2G00021950,CRV2G00021951(dist=347)	CRV2G00021950	Similar to ARA1 L-arabinose-responsive transcription regulator ARA1 (Magnaporthe oryzae (strain 70-15 / ATCC MYA-4617 / FGSC 8958))	0
unitig_228:8287	0.038	0.01152	0.00685574	0.960706	0.0392945	0.0121531	0.0324387	0.00992405	0.0222322	0.0109934	intergenic	NONE(dist=NONE),CRV2G00018519(dist=8154)	CRV2G00018519	Protein of unknown function	0
unitig_228:131582	0.038	0.01152	0.00685574	0.960706	0.0392945	0.0121737	0.0324387	0.00994137	0.0222322	0.0109934	intronic	CRV2G00018562	CRV2G00018562	Protein of unknown function	0
unitig_228:131607	0.038	0.01152	0.00685574	0.960706	0.0392945	0.0121942	0.0324387	0.00995866	0.0222322	0.0109934	intronic	CRV2G00018562	CRV2G00018562	Protein of unknown function	0
unitig_228:131673	0.038	0.01152	0.00685574	0.960706	0.0392945	0.0122147	0.0324387	0.00997593	0.0222322	0.0109934	exonic	CRV2G00018562	CRV2G00018562	Protein of unknown function	0
unitig_1018:557429	0.038	0.01152	0.00685574	0.960706	0.0392945	0.0122352	0.0324387	0.00999317	0.0222322	0.0109934	intergenic	CRV2G00015919(dist=23125),NONE(dist=NONE)	CRV2G00015919	Similar to ANK1 Ankyrin-1 (Homo sapiens)	GO:0005515
unitig_105:85904	0.02231	0.007421	0.00507809	0.960661	0.0393393	0.0122557	0.0342612	0.0106725	0.0149874	0.0074574	downstream	CRV2G00018066(dist=385)	CRV2G00018066	Protein of unknown function	0
unitig_105:85912	0.02231	0.007421	0.00507809	0.960661	0.0393393	0.0122761	0.0342612	0.0106901	0.0149874	0.0074574	downstream	CRV2G00018066(dist=377)	CRV2G00018066	Protein of unknown function	0
unitig_821:2159811	0.02414	0.007936	0.00534411	0.960592	0.0394078	0.0122966	0.0340637	0.0106198	0.0160544	0.0082307	intergenic	CRV2G00008602(dist=2228),CRV2G00008603(dist=1792)	CRV2G00008602	Protein of unknown function	0
unitig_105:231089	0.02806	0.009015	0.00586762	0.960525	0.0394751	0.0123171	0.0336075	0.0104096	0.0182815	0.00953661	intergenic	CRV2G00018099(dist=16603),CRV2G00018100(dist=14846)	CRV2G00018099	Similar to TIC32 Short-chain dehydrogenase TIC 32, chloroplastic (Arabidopsis thaliana)	GO:0008152;GO:0016491
unitig_659:92876	0.02589	0.008424	0.00559601	0.960492	0.0395076	0.0123376	0.0339116	0.0105497	0.0170743	0.00888298	upstream	CRV2G00019299(dist=367)	CRV2G00019299	Protein of unknown function	0
unitig_664:33291	-0.03419	0.01061	0.960402	0.00657166	0.0395978	0.0123581	0.0330261	0.0102353	-0.0209902	0.0106304	upstream;downstream	CRV2G00017443(dist=823);CRV2G00017444(dist=613)	CRV2G00017443	Protein of unknown function	0
unitig_595:88110	0.0423	0.01251	0.00724971	0.960398	0.0396016	0.0123786	0.0323519	0.00987205	0.0232914	0.0113503	intergenic	CRV2G00019144(dist=1809),CRV2G00019145(dist=5013)	CRV2G00019144	Protein of unknown function	0
scf_004:615190	0.049	0.01393	0.00766881	0.960394	0.039606	0.0123991	0.0319372	0.00976821	0.0246921	0.0120154	exonic	CRV2G00009988	CRV2G00009988	Protein of unknown function	0
unitig_818:52839	0.04575	0.01326	0.00750324	0.960282	0.0397181	0.0124196	0.0322149	0.00983741	0.0240261	0.0116628	upstream	CRV2G00017597(dist=319)	CRV2G00017597	Similar to NPHP3 Nephrocystin-3 (Homo sapiens)	GO:0005515
unitig_41:194479	0.02402	0.007912	0.00538525	0.960242	0.0397576	0.0124402	0.0343724	0.0107253	0.0159672	0.00818872	intergenic	CRV2G00016391(dist=10669),CRV2G00016392(dist=9998)	CRV2G00016391	Protein of unknown function	0
unitig_178:4590	0.03178	0.01001	0.00638106	0.960095	0.0399048	0.0124608	0.0335237	0.0103921	0.0200243	0.0103101	intergenic	NONE(dist=NONE),NONE(dist=NONE)		#N/A	#N/A
unitig_595:19817	-0.03095	0.009795	0.960094	0.00628903	0.0399059	0.0124813	0.0336169	0.0104271	-0.0196638	0.0101713	exonic	CRV2G00019123	CRV2G00019123	Protein of unknown function	GO:0008168;GO:0008152
unitig_595:20908	0.02533	0.008283	0.00560438	0.960005	0.0399945	0.0125019	0.0343901	0.0107429	0.0167237	0.00869436	exonic	CRV2G00019124	CRV2G00019124	Protein of unknown function	GO:0008152;GO:0016846
unitig_595:20923	0.02533	0.008283	0.00560438	0.960005	0.0399945	0.0125225	0.0343901	0.0107605	0.0167237	0.00869436	exonic	CRV2G00019124	CRV2G00019124	Protein of unknown function	GO:0008152;GO:0016846
unitig_821:2368115	0.02399	0.007915	0.00545075	0.95982	0.04018	0.0125432	0.0347293	0.0110055	0.0159299	0.00818412	intergenic	CRV2G00008665(dist=10153),CRV2G00008666(dist=4297)	CRV2G00008665	Protein of unknown function	0
unitig_821:2368151	0.02399	0.007915	0.00545075	0.95982	0.04018	0.0125639	0.0347293	0.0110229	0.0159299	0.00818412	intergenic	CRV2G00008665(dist=10189),CRV2G00008666(dist=4261)	CRV2G00008665	Protein of unknown function	0
unitig_651:5017	0.01125	0.004039	0.00319258	0.959709	0.0402912	0.0125846	0.0370986	0.0116975	0.00970999	0.00388811	intergenic	NONE(dist=NONE),NONE(dist=NONE)		#N/A	#N/A
unitig_154:36511	-0.05189	0.01454	0.959644	0.00799368	0.0403564	0.0126053	0.0323627	0.0099067	-0.025181	0.0124253	intergenic	CRV2G00018944(dist=6481),CRV2G00018945(dist=36701)	CRV2G00018944	Protein of unknown function	0
unitig_152:49008	0.0325	0.01021	0.00655255	0.959609	0.0403906	0.012626	0.0338381	0.0104971	0.0202823	0.0104278	downstream	CRV2G00019479(dist=572)	CRV2G00019479	Protein of unknown function	0
unitig_152:49428	0.0325	0.01021	0.00655255	0.959609	0.0403906	0.0126467	0.0338381	0.0105146	0.0202823	0.0104278	downstream	CRV2G00019479(dist=992)	CRV2G00019479	Protein of unknown function	0
unitig_269:8277	-0.019	0.006502	0.959532	0.00475224	0.0404681	0.0126674	0.0357158	0.0113394	-0.0131937	0.00606264	UTR3	CRV2G00021717(CRV2T00021717_1:c.*76T>C),CRV2G00021718(CRV2T00021718_1:c.*636A>G)	CRV2G00021717	Protein of unknown function	0
unitig_664:22324	-0.02783	0.008983	0.959502	0.00602204	0.0404982	0.0126881	0.0344762	0.0108481	-0.0180938	0.00949163	exonic	CRV2G00017438	CRV2G00017438	Protein of unknown function	0
scf_014:806866	-0.02638	0.008588	0.959467	0.00583842	0.040533	0.0127088	0.0346946	0.0109356	-0.0172963	0.00906223	intergenic	CRV2G00012254(dist=9753),CRV2G00012255(dist=2617)	CRV2G00012254	Protein of unknown function	0
scf_014:806894	-0.02638	0.008588	0.959467	0.00583842	0.040533	0.0127295	0.0346946	0.0109531	-0.0172963	0.00906223	intergenic	CRV2G00012254(dist=9781),CRV2G00012255(dist=2589)	CRV2G00012254	Protein of unknown function	0
scf_014:806920	-0.02638	0.008588	0.959467	0.00583842	0.040533	0.0127501	0.0346946	0.0109706	-0.0172963	0.00906223	intergenic	CRV2G00012254(dist=9807),CRV2G00012255(dist=2563)	CRV2G00012254	Protein of unknown function	0
scf_014:806933	-0.02638	0.008588	0.959467	0.00583842	0.040533	0.0127707	0.0346946	0.010988	-0.0172963	0.00906223	intergenic	CRV2G00012254(dist=9820),CRV2G00012255(dist=2550)	CRV2G00012254	Protein of unknown function	0
unitig_183:16200	0.023	0.007649	0.00538344	0.959368	0.0406323	0.0127914	0.0352488	0.0111628	0.0153322	0.0077807	intergenic	NONE(dist=NONE),CRV2G00019790(dist=16397)	CRV2G00019790	Similar to HNM1 Choline transport protein (Saccharomyces cerevisiae (strain ATCC 204508 / S288c))	GO:0016020;GO:0015171;GO:0003333
unitig_659:12093	0.02186	0.007331	0.00524341	0.959194	0.0408058	0.0128122	0.0355624	0.0112687	0.0146753	0.00728905	exonic	CRV2G00019284	CRV2G00019284	Similar to Kinesin light chain (Doryteuthis pealeii)	GO:0005515
unitig_296:1230	-0.026	0.008493	0.959122	0.00584708	0.0408777	0.0128329	0.0350306	0.0111102	-0.0170619	0.00894242	splicing	CRV2G00022260(CRV2T00022260_1:exon2:c.1210-2A>G)	CRV2G00022260	Similar to fluG Protein fluG (Emericella nidulans (strain FGSC A4 / ATCC 38163 / CBS 112.46 / NRRL 194 / M139))	GO:0008152;GO:0006807;GO:0004356;GO:0003824
unitig_818:38226	-0.0215	0.007231	0.9591	0.00520416	0.0409002	0.0128537	0.035696	0.0113217	-0.0144719	0.00713264	upstream	CRV2G00017594(dist=98)	CRV2G00017594	Protein of unknown function	0
unitig_41:286856	0.04586	0.01333	0.00778402	0.959043	0.0409572	0.0128745	0.0331732	0.0102527	0.0239235	0.0117135	intergenic	CRV2G00016400(dist=3279),CRV2G00016401(dist=14495)	CRV2G00016400	Protein of unknown function	0
unitig_1:441125	-0.03183	0.01006	0.958913	0.00661318	0.0410869	0.0128953	0.0344737	0.0108306	-0.0199534	0.0103396	intergenic	CRV2G00013600(dist=11843),CRV2G00013601(dist=28760)	CRV2G00013600	Similar to paxP Cytochrome P450 monooxygenase paxP (Penicillium paxilli)	GO:0016705;GO:0055114;GO:0020037;GO:0004497;GO:0005506
unitig_242:137482	0.03569	0.01103	0.00702537	0.958861	0.0411388	0.0129161	0.0341134	0.0106374	0.0213686	0.0108268	intronic	CRV2G00019090	CRV2G00019090	Similar to laeA Secondary metabolism regulator laeA (Fusarium oxysporum f. sp. lycopersici (strain 4287 / CBS 123668 / FGSC 9935 / NRRL 34936))	0
unitig_41:263188	0.0331	0.01039	0.0067853	0.958745	0.0412545	0.012937	0.0344692	0.0108131	0.0204481	0.0105279	intergenic	CRV2G00016399(dist=6984),CRV2G00016400(dist=19606)	CRV2G00016399	Protein of unknown function	0
unitig_818:194199	0.05792	0.01574	0.00849797	0.958722	0.0412776	0.0129579	0.0327796	0.0101316	0.0262894	0.0134651	intergenic	CRV2G00017626(dist=2680),CRV2G00017627(dist=1578)	CRV2G00017626	Protein of unknown function	0
scf_003:2834694	0.02119	0.007158	0.00525483	0.95847	0.0415304	0.012979	0.0362756	0.0114816	0.0142798	0.00700923	exonic	CRV2G00007790	CRV2G00007790	Protein of unknown function	0
scf_003:2834933	0.02119	0.007158	0.00525483	0.95847	0.0415304	0.013	0.0362756	0.0114994	0.0142798	0.00700923	exonic	CRV2G00007790	CRV2G00007790	Protein of unknown function	0
unitig_659:80738	0.06394	0.01686	0.00882498	0.958412	0.0415878	0.013021	0.0327628	0.0100797	0.0275425	0.0146929	intergenic	CRV2G00019298(dist=1056),CRV2G00019299(dist=12505)	CRV2G00019298	Protein of unknown function	0
unitig_659:80749	0.06394	0.01686	0.00882498	0.958412	0.0415878	0.013042	0.0327628	0.010097	0.0275425	0.0146929	intergenic	CRV2G00019298(dist=1067),CRV2G00019299(dist=12494)	CRV2G00019298	Protein of unknown function	0
unitig_659:54888	0.03604	0.01113	0.0071506	0.95841	0.0415901	0.0130629	0.0344395	0.0107955	0.0214409	0.010872	UTR5	CRV2G00019292(CRV2T00019292_1:c.-114C>T)	CRV2G00019292	Similar to chit42 Endochitinase 42 (Trichoderma harzianum)	GO:0004568;GO:0004553;GO:0005975;GO:0003824;GO:0006032
unitig_41:299380	0.03695	0.01135	0.00724008	0.95839	0.0416096	0.0130839	0.0343696	0.0107077	0.0217175	0.0109592	intergenic	CRV2G00016400(dist=15803),CRV2G00016401(dist=1971)	CRV2G00016400	Protein of unknown function	0
unitig_723:13658	0.03156	0.01001	0.00670558	0.958273	0.0417271	0.0131049	0.0350215	0.0110927	0.019791	0.0103075	upstream	CRV2G00016663(dist=89)	CRV2G00016663	Protein of unknown function	0
unitig_821:1403225	0.042	0.01252	0.00768545	0.958273	0.0417272	0.0131259	0.0340417	0.0106023	0.023017	0.0113885	intergenic	CRV2G00008363(dist=16812),CRV2G00008364(dist=32241)	CRV2G00008363	Similar to SPAC513.07 Putative uncharacterized oxidoreductase C513.07 (Schizosaccharomyces pombe (strain 972 / ATCC 24843))	GO:0050662;GO:0003824;GO:0044237
unitig_659:17091	0.04005	0.01208	0.00753517	0.958263	0.0417372	0.0131468	0.034202	0.0106549	0.0225497	0.0112281	intergenic	CRV2G00019284(dist=2115),CRV2G00019285(dist=7367)	CRV2G00019284	Similar to Kinesin light chain (Doryteuthis pealeii)	GO:0005515
scf_014:983739	-0.02725	0.008864	0.958152	0.00618773	0.0418484	0.0131678	0.0356607	0.011304	-0.0177002	0.00934966	intergenic	CRV2G00012293(dist=15736),CRV2G00012294(dist=14754)	CRV2G00012293	Protein of unknown function	GO:0005975;GO:0003824
scf_003:2837134	0.02658	0.008681	0.00610194	0.95812	0.0418796	0.0131888	0.0357777	0.0113748	0.0173317	0.00914708	exonic	CRV2G00007791	CRV2G00007791	Protein of unknown function	GO:0008168;GO:0008152
unitig_232:7330	-0.0357	0.01106	0.958021	0.00719687	0.041979	0.0132098	0.0347821	0.0110403	-0.0212994	0.0108465	intergenic	NONE(dist=NONE),NONE(dist=NONE)		#N/A	#N/A
scf_003:406004	0.04057	0.01221	0.00764704	0.957935	0.0420649	0.0132309	0.0344179	0.010778	0.0226475	0.0112797	intergenic	CRV2G00007051(dist=10239),CRV2G00007052(dist=54276)	CRV2G00007051	Protein of unknown function	0
unitig_697:13828	0.03288	0.01036	0.00692255	0.957924	0.0420759	0.0132519	0.0351533	0.0111453	0.0202979	0.0105135	intergenic	NONE(dist=NONE),CRV2G00018376(dist=1521)	CRV2G00018376	Protein of unknown function	0
unitig_105:143108	0.03675	0.01132	0.00733305	0.957849	0.0421514	0.013273	0.0348184	0.0110578	0.0216101	0.0109533	intergenic	CRV2G00018084(dist=2423),CRV2G00018085(dist=14149)	CRV2G00018084	Protein of unknown function	GO:0004601
unitig_105:143113	0.03675	0.01132	0.00733305	0.957849	0.0421514	0.013294	0.0348184	0.0110752	0.0216101	0.0109533	intergenic	CRV2G00018084(dist=2428),CRV2G00018085(dist=14144)	CRV2G00018084	Protein of unknown function	GO:0004601
unitig_658:733534	0.03462	0.0108	0.00712465	0.957841	0.0421585	0.013315	0.0350339	0.0111277	0.0209256	0.0107338	intergenic	CRV2G00014353(dist=6634),NONE(dist=NONE)	CRV2G00014353	Protein of unknown function	0
unitig_818:190117	0.05217	0.01467	0.00844206	0.957764	0.0422358	0.0133361	0.0337938	0.0104796	0.0250348	0.0125224	exonic	CRV2G00017626	CRV2G00017626	Protein of unknown function	0
scf_010:2102521	0.02444	0.008097	0.00586602	0.957722	0.0422776	0.0133571	0.0364116	0.0115709	0.0160941	0.00839837	intergenic	CRV2G00011325(dist=3131),CRV2G00011326(dist=21989)	CRV2G00011325	Protein of unknown function	GO:0000981;GO:0006355;GO:0005634;GO:0008270
unitig_616:2277	0.0298	0.009568	0.00662055	0.957605	0.0423954	0.0133782	0.0357748	0.0113571	0.0189563	0.00999151	intergenic	NONE(dist=NONE),CRV2G00022077(dist=2577)	CRV2G00022077	Protein of unknown function	0
unitig_105:85819	0.03233	0.01023	0.0069278	0.957582	0.0424178	0.0133992	0.03549	0.0112334	0.0200549	0.0104404	downstream	CRV2G00018066(dist=470)	CRV2G00018066	Protein of unknown function	0
scf_003:399598	0.04207	0.01256	0.00784036	0.957582	0.0424178	0.0134203	0.0345774	0.0108656	0.0229675	0.011414	intergenic	CRV2G00007051(dist=3833),CRV2G00007052(dist=60682)	CRV2G00007051	Protein of unknown function	0
scf_003:458283	0.04207	0.01256	0.00784036	0.957582	0.0424178	0.0134413	0.0345774	0.0108831	0.0229675	0.011414	intergenic	CRV2G00007051(dist=62518),CRV2G00007052(dist=1997)	CRV2G00007051	Protein of unknown function	0
scf_003:458504	0.04207	0.01256	0.00784036	0.957582	0.0424178	0.0134623	0.0345774	0.0109006	0.0229675	0.011414	intergenic	CRV2G00007051(dist=62739),CRV2G00007052(dist=1776)	CRV2G00007051	Protein of unknown function	0
unitig_196:31513	0.0268	0.008757	0.00623023	0.957568	0.0424316	0.0134832	0.0362013	0.0114637	0.0174215	0.00922395	downstream	CRV2G00019380,CRV2G00019381(dist=593)	CRV2G00019380	Similar to alv-1 5-aminolevulinate synthase, mitochondrial (Neurospora crassa (strain ATCC 24698 / 74-OR23-1A / CBS 708.71 / DSM 1257 / FGSC 987))	GO:0016740;GO:0003824;GO:0009058;GO:0008152;GO:0033014;GO:0030170;GO:0003870
unitig_1:92309	0.03929	0.01195	0.00775191	0.956943	0.043057	0.0135046	0.0353051	0.0111805	0.0222357	0.0111993	intronic	CRV2G00013464	CRV2G00013464	Protein of unknown function	0
unitig_1:92318	0.03929	0.01195	0.00775191	0.956943	0.043057	0.013526	0.0353051	0.011198	0.0222357	0.0111993	intronic	CRV2G00013464	CRV2G00013464	Protein of unknown function	0
scf_001:3897779	-0.02622	0.008616	0.956878	0.00627087	0.0431222	0.0135474	0.0368514	0.011625	-0.0170632	0.00905034	downstream	CRV2G00004620(dist=275)	CRV2G00004620	Similar to ppoA Psi-producing oxygenase A (Neosartorya fumigata (strain CEA10 / CBS 144.89 / FGSC A1163))	GO:0055114;GO:0006979;GO:0004601;GO:0020037
unitig_785:14173	-0.02757	0.008989	0.956827	0.00647017	0.0431731	0.0135687	0.0367029	0.0116069	-0.0177918	0.00946094	intergenic	NONE(dist=NONE),CRV2G00019352(dist=9076)	CRV2G00019352	Protein of unknown function	0
unitig_41:276151	0.03456	0.01082	0.00733934	0.956745	0.0432548	0.0135901	0.0359154	0.0114101	0.0208145	0.0107491	intergenic	CRV2G00016399(dist=19947),CRV2G00016400(dist=6643)	CRV2G00016399	Protein of unknown function	0
unitig_57:11440	0.02167	0.00734	0.00562089	0.956622	0.0433779	0.0136116	0.037757	0.0118803	0.014475	0.00725594	downstream	CRV2G00021044(dist=174)	CRV2G00021044	Protein of unknown function	GO:0003676;GO:0046872
unitig_170:19056	0.02952	0.009524	0.00678085	0.956562	0.0434383	0.0136331	0.0366574	0.0115889	0.0187529	0.009948	upstream	CRV2G00019607,CRV2G00019608(dist=437)	CRV2G00019607	Protein of unknown function	GO:0016772
unitig_41:222866	0.03342	0.01054	0.00725495	0.956548	0.0434523	0.0136545	0.0361974	0.0114459	0.020393	0.0106122	intergenic	CRV2G00016392(dist=16374),CRV2G00016393(dist=19533)	CRV2G00016392	Similar to ARB_01230 Kelch repeat-containing protein ARB_01230 (Arthroderma benhamiae (strain ATCC MYA-4681 / CBS 112371))	GO:0005515
scf_003:146253	-0.027	0.008842	0.956492	0.00645089	0.0435077	0.013676	0.0370568	0.0116794	-0.0174685	0.00930074	downstream	CRV2G00006984(dist=241)	CRV2G00006984	Similar to OLE1 Acyl-CoA desaturase (Ajellomyces capsulatus)	GO:0005783;GO:0016717;GO:0004768;GO:0006629;GO:0055114;GO:0006633;GO:0020037;GO:0016020;GO:0005506
unitig_334:5191	0.03807	0.01168	0.00774207	0.956475	0.0435252	0.0136974	0.0357831	0.0113924	0.0218688	0.0111055	upstream;downstream	CRV2G00022028(dist=926);CRV2G00022029(dist=502)	CRV2G00022028	Protein of unknown function	0
scf_005:4719816	0.02872	0.009315	0.00671386	0.956354	0.0436461	0.0137189	0.0369322	0.0116431	0.018351	0.00976752	intergenic	CRV2G00003316(dist=24553),CRV2G00003317(dist=12569)	CRV2G00003316	Similar to MexAM1_META1p0182 Uncharacterized oxidoreductase MexAM1_META1p0182 (Methylobacterium extorquens (strain ATCC 14718 / DSM 1338 / JCM 2805 / NCIMB 9133 / AM1))	GO:0008152;GO:0016491
unitig_818:32609	0.03375	0.01063	0.00733428	0.956334	0.0436656	0.0137404	0.0363313	0.0115173	0.0204965	0.0106588	intergenic	NONE(dist=NONE),CRV2G00017594(dist=5715)	CRV2G00017594	Protein of unknown function	0
scf_025:1209191	-0.02857	0.009276	0.956299	0.00670373	0.0437005	0.0137619	0.0369968	0.0116612	-0.0182729	0.0097317	upstream	CRV2G00012928(dist=895)	CRV2G00012928	Protein of unknown function	0
unitig_659:55837	0.04267	0.01274	0.00817696	0.956251	0.0437492	0.0137834	0.0355722	0.0112863	0.022977	0.0115024	upstream	CRV2G00019292(dist=400)	CRV2G00019292	Similar to chit42 Endochitinase 42 (Trichoderma harzianum)	GO:0004568;GO:0004553;GO:0005975;GO:0003824;GO:0006032
unitig_595:20676	-0.02376	0.007945	0.956206	0.00601909	0.0437939	0.0138048	0.0377748	0.011917	-0.0156344	0.00815337	exonic	CRV2G00019124	CRV2G00019124	Protein of unknown function	GO:0008152;GO:0016846
scf_003:2824075	0.02122	0.007222	0.00562169	0.956155	0.0438447	0.0138263	0.038223	0.0121191	0.0142148	0.00706831	intergenic	CRV2G00007786(dist=1332),CRV2G00007787(dist=1852)	CRV2G00007786	Protein of unknown function	0
scf_003:2824144	0.02122	0.007222	0.00562169	0.956155	0.0438447	0.0138478	0.038223	0.0121374	0.0142148	0.00706831	intergenic	CRV2G00007786(dist=1401),CRV2G00007787(dist=1783)	CRV2G00007786	Protein of unknown function	0
unitig_42:4625	0.0085	0.003055	0.00268336	0.956129	0.0438707	0.0138692	0.0411873	0.0131066	0.00793971	0.00325687	intronic	CRV2G00020815	CRV2G00020815	Similar to rec12 Meiotic recombination protein rec12 (Schizosaccharomyces pombe (strain 972 / ATCC 24843))	GO:0006259;GO:0003824;GO:0005524;GO:0005694;GO:0003677
unitig_111:298754	-0.02475	0.008227	0.95609	0.00619091	0.0439097	0.0138907	0.0377188	0.0118619	-0.0161947	0.0085436	intergenic	CRV2G00016027(dist=12416),CRV2G00016028(dist=9860)	CRV2G00016027	Similar to trx Thioredoxin (Neurospora crassa (strain ATCC 24698 / 74-OR23-1A / CBS 708.71 / DSM 1257 / FGSC 987))	GO:0006662;GO:0015035;GO:0045454
unitig_170:19177	0.02743	0.008973	0.00659555	0.956029	0.0439708	0.0139121	0.0373752	0.0117341	0.0176708	0.00943317	upstream	CRV2G00019608(dist=316)	CRV2G00019608	Protein of unknown function	0
unitig_170:19189	0.02743	0.008973	0.00659555	0.956029	0.0439708	0.0139336	0.0373752	0.0117524	0.0176708	0.00943317	upstream	CRV2G00019608(dist=304)	CRV2G00019608	Protein of unknown function	0
unitig_105:7396	0.02228	0.007529	0.00581544	0.956022	0.0439775	0.013955	0.0381621	0.0121007	0.0147896	0.00753289	intergenic	NONE(dist=NONE),CRV2G00018048(dist=3183)	CRV2G00018048	Protein of unknown function	0
unitig_643:86393	0.05061	0.01444	0.00885006	0.955629	0.0443707	0.0139766	0.0355206	0.011251	0.0245134	0.0123663	intergenic	CRV2G00019327(dist=27445),NONE(dist=NONE)	CRV2G00019327	Similar to betA Oxygen-dependent choline dehydrogenase (Burkholderia multivorans (strain ATCC 17616 / 249))	GO:0055114;GO:0050660;GO:0006066;GO:0016614;GO:0008812
unitig_227:53603	-0.02983	0.009634	0.955626	0.0069985	0.0443744	0.0139982	0.0373759	0.0117706	-0.0188352	0.0100284	intergenic	CRV2G00019646(dist=2645),NONE(dist=NONE)	CRV2G00019646	Protein of unknown function	GO:0005576
unitig_658:155688	0.03014	0.009718	0.00704865	0.955575	0.0444246	0.0140198	0.037376	0.0117889	0.0189739	0.0100927	exonic	CRV2G00014140	CRV2G00014140	Protein of unknown function	0
unitig_333:180290	0.04089	0.01237	0.00822238	0.955389	0.0446113	0.0140416	0.0363889	0.0115352	0.0224907	0.0113735	intergenic	CRV2G00018666(dist=1226),CRV2G00018668(dist=31426)	CRV2G00018666	Protein of unknown function	GO:0003676;GO:0046872
scf_004:662459	0.02072	0.007101	0.00569509	0.955155	0.0448452	0.0140634	0.0391501	0.0122866	0.0139171	0.00687071	intergenic	CRV2G00009988(dist=46628),CRV2G00009989(dist=11691)	CRV2G00009988	Protein of unknown function	0
unitig_114:258221	0.04707	0.01373	0.00874851	0.955106	0.0448944	0.0140853	0.0361459	0.011428	0.0237785	0.0119571	upstream;downstream	CRV2G00014447(dist=490);CRV2G00014448(dist=100)	CRV2G00014447	Protein of unknown function	0
scf_004:614624	0.06129	0.01652	0.00953984	0.955027	0.0449729	0.0141072	0.0354331	0.0112157	0.0265558	0.0141901	downstream	CRV2G00009988(dist=275)	CRV2G00009988	Protein of unknown function	0
unitig_105:244085	0.02917	0.009475	0.00702827	0.955001	0.0449987	0.0141291	0.0379704	0.0119905	0.0184833	0.00989323	intergenic	CRV2G00018099(dist=29599),CRV2G00018100(dist=1850)	CRV2G00018099	Similar to TIC32 Short-chain dehydrogenase TIC 32, chloroplastic (Arabidopsis thaliana)	GO:0008152;GO:0016491
unitig_934:18541	0.04562	0.01343	0.00869641	0.954895	0.0451046	0.014151	0.0364082	0.011553	0.0234702	0.011813	upstream;downstream	CRV2G00019899,CRV2G00019900(dist=299);CRV2G00019901,CRV2G00019902,CRV2G00019903,CRV2G00019904(dist=131)	CRV2G00019899	#N/A	#N/A
unitig_112:7899	0.03488	0.01096	0.00776612	0.954818	0.0451822	0.0141729	0.0374161	0.0118071	0.0207659	0.0108236	intergenic	CRV2G00021551(dist=3255),CRV2G00021552(dist=1704)	CRV2G00021551	Similar to aifB Apoptosis-inducing factor homolog B (Dictyostelium discoideum)	GO:0055114;GO:0050660;GO:0016491
unitig_171:639154	0.02993	0.009689	0.00719907	0.954644	0.0453557	0.014195	0.0381566	0.0120824	0.0188152	0.0100639	intergenic	CRV2G00015473(dist=6929),NONE(dist=NONE)	CRV2G00015473	Similar to YIL108W Putative zinc metalloproteinase YIL108W (Saccharomyces cerevisiae (strain ATCC 204508 / S288c))	0
unitig_821:1849984	-0.03412	0.01078	0.954493	0.00774773	0.0455071	0.0142171	0.0377593	0.0118987	-0.020482	0.0107394	intergenic	CRV2G00008510(dist=18011),CRV2G00008511(dist=12961)	CRV2G00008510	Protein of unknown function	0
unitig_626:392159	0.03405	0.01077	0.00779046	0.954244	0.0457563	0.0142393	0.0379658	0.0119538	0.0204381	0.0107352	intergenic	CRV2G00017143(dist=18765),CRV2G00017144(dist=30054)	CRV2G00017143	Protein of unknown function	0
unitig_105:95101	0.04163	0.01258	0.00855927	0.954132	0.045868	0.0142617	0.0373087	0.0117158	0.0225493	0.0114686	intergenic	CRV2G00018067(dist=4816),CRV2G00018068(dist=1521)	CRV2G00018067	Similar to FMP42 Protein FMP42 (Saccharomyces cerevisiae (strain ATCC 204508 / S288c))	0
unitig_818:230294	-0.02698	0.008903	0.95406	0.00688869	0.0459399	0.014284	0.0390512	0.0122491	-0.0173208	0.00932987	exonic	CRV2G00017634	CRV2G00017634	Protein of unknown function	0
unitig_313:6921	-0.04204	0.01268	0.953902	0.0086441	0.0460976	0.0143064	0.0374535	0.0118253	-0.0226213	0.0115099	upstream	CRV2G00021950,CRV2G00021951(dist=365)	CRV2G00021950	Similar to ARA1 L-arabinose-responsive transcription regulator ARA1 (Magnaporthe oryzae (strain 70-15 / ATCC MYA-4617 / FGSC 8958))	0
unitig_723:31034	-0.0415	0.01256	0.953853	0.00860972	0.046147	0.0143288	0.0375373	0.0118436	-0.0224946	0.0114644	intergenic	CRV2G00016667(dist=4868),CRV2G00016668(dist=6811)	CRV2G00016667	Protein of unknown function	0
scf_022:893506	-0.03879	0.01194	0.953712	0.00839723	0.0462883	0.0143513	0.0378911	0.0119354	-0.0218215	0.0112331	exonic	CRV2G00004936	CRV2G00004936	Protein of unknown function	0
unitig_821:232886	0.03794	0.01174	0.00832165	0.953681	0.0463193	0.0143737	0.0379976	0.0120089	0.0215921	0.0111571	intergenic	CRV2G00007970(dist=18916),CRV2G00007971(dist=37586)	CRV2G00007970	Protein of unknown function	GO:0016758;GO:0005975;GO:0016020
unitig_747:14444	0.02825	0.009264	0.00715717	0.953625	0.046375	0.0143962	0.0392178	0.0123054	0.0179481	0.00968945	downstream	CRV2G00019402(dist=905)	CRV2G00019402	Similar to ANR Anthocyanidin reductase ((2S)-flavan-3-ol-forming) (Vitis vinifera)	GO:0050662;GO:0003824;GO:0044237
unitig_1037:10543	-0.02	0.006928	0.953523	0.00582237	0.0464768	0.0144187	0.0406544	0.012763	-0.0134991	0.00659586	intergenic	CRV2G00022112(dist=9420),NONE(dist=NONE)	CRV2G00022112	Protein of unknown function	0
unitig_196:15699	0.02694	0.008917	0.00705356	0.953125	0.0468745	0.0144415	0.039821	0.012457	0.0172481	0.00933092	upstream	CRV2G00019377(dist=7)	CRV2G00019377	Protein of unknown function	0
unitig_949:4635	-0.0275	0.009074	0.953045	0.00715379	0.0469547	0.0144643	0.0398009	0.012419	-0.0175348	0.00949526	intergenic	NONE(dist=NONE),NONE(dist=NONE)		#N/A	#N/A
scf_014:980870	-0.03538	0.01114	0.953004	0.00819599	0.046996	0.014487	0.0388	0.0122116	-0.020783	0.0109144	intergenic	CRV2G00012293(dist=12867),CRV2G00012294(dist=17623)	CRV2G00012293	Protein of unknown function	GO:0005975;GO:0003824
unitig_818:183091	0.02998	0.00975	0.00752799	0.952971	0.0470286	0.0145098	0.0395006	0.0123433	0.0187269	0.0100986	downstream	CRV2G00017623(dist=299)	CRV2G00017623	Protein of unknown function	0
unitig_818:62583	-0.04525	0.01342	0.952912	0.00911915	0.0470883	0.0145326	0.0379691	0.0119722	-0.02321	0.0118303	downstream	CRV2G00017600(dist=39)	CRV2G00017600	Protein of unknown function	0
unitig_105:186824	0.02533	0.008476	0.00686173	0.952778	0.0472216	0.0145554	0.0403599	0.0126673	0.0163613	0.00880662	intergenic	CRV2G00018092(dist=5396),CRV2G00018093(dist=1413)	CRV2G00018092	Protein of unknown function	0
unitig_75:4086	0.03538	0.01115	0.00826401	0.952678	0.0473225	0.0145783	0.0390584	0.0122679	0.020757	0.0109205	UTR3	CRV2G00021927(CRV2T00021927_1:c.*726A>G)	CRV2G00021927	Protein of unknown function	0
unitig_1:882202	-0.02669	0.008862	0.952581	0.00711446	0.0474189	0.0146012	0.0403045	0.0126291	-0.0170868	0.00926212	exonic	CRV2G00013758	CRV2G00013758	Protein of unknown function	GO:0016810
unitig_154:123649	0.03063	0.009937	0.00771226	0.952486	0.0475142	0.0146242	0.0398019	0.012438	0.0189806	0.0102345	upstream	CRV2G00018960(dist=623)	CRV2G00018960	Similar to STE23 A-factor-processing enzyme (Saccharomyces cerevisiae (strain ATCC 204508 / S288c))	GO:0003824;GO:0046872
unitig_31:15603	0.02349	0.007963	0.00661949	0.952407	0.047593	0.0146472	0.0409735	0.0130112	0.0153219	0.00810593	exonic	CRV2G00020291	CRV2G00020291	Protein of unknown function	0
unitig_226:9912	0.04142	0.01259	0.00892281	0.952404	0.0475963	0.0146701	0.0386735	0.0121744	0.0223479	0.0114929	intergenic	NONE(dist=NONE),NONE(dist=NONE)		#N/A	#N/A
unitig_55:8782	-0.0167	0.005962	0.952351	0.00534794	0.0476493	0.0146931	0.0423014	0.0136596	-0.0119748	0.00539573	exonic	CRV2G00021189	CRV2G00021189	Similar to SPAC1002.16c Uncharacterized transporter C1002.16c (Schizosaccharomyces pombe (strain 972 / ATCC 24843))	GO:0055085;GO:0016021
unitig_1:91939	0.01754	0.006224	0.00555716	0.952121	0.0478785	0.0147161	0.0423214	0.0136786	0.0123239	0.00567577	exonic	CRV2G00013464	CRV2G00013464	Protein of unknown function	0
scf_003:2790781	0.04072	0.01244	0.00892564	0.952108	0.0478918	0.0147392	0.0389662	0.0122304	0.0221601	0.0114389	intergenic	CRV2G00007770(dist=1721),CRV2G00007771(dist=1251)	CRV2G00007770	Protein of unknown function	GO:0046872
unitig_821:2370026	0.02396	0.008106	0.00676178	0.952048	0.0479522	0.0147623	0.0411904	0.0131256	0.0155684	0.00830094	intergenic	CRV2G00008665(dist=12064),CRV2G00008666(dist=2386)	CRV2G00008665	Protein of unknown function	0
unitig_253:2103	0.01475	0.00535	0.00494428	0.952047	0.047953	0.0147853	0.0430087	0.0140956	0.0111692	0.00485376	intergenic	NONE(dist=NONE),NONE(dist=NONE)		#N/A	#N/A
scf_003:146118	-0.0264	0.008796	0.952014	0.00717209	0.0479857	0.0148083	0.0408136	0.0129159	-0.016903	0.00917875	downstream	CRV2G00006984(dist=376)	CRV2G00006984	Similar to OLE1 Acyl-CoA desaturase (Ajellomyces capsulatus)	GO:0005783;GO:0016717;GO:0004768;GO:0006629;GO:0055114;GO:0006633;GO:0020037;GO:0016020;GO:0005506
unitig_818:161452	0.05419	0.01529	0.00992152	0.951974	0.0480256	0.0148313	0.0381041	0.0120273	0.0248226	0.0129786	exonic	CRV2G00017620	CRV2G00017620	Protein of unknown function	GO:0003676;GO:0046872
unitig_818:162652	0.05419	0.01529	0.00992152	0.951974	0.0480256	0.0148543	0.0381041	0.0120457	0.0248226	0.0129786	upstream	CRV2G00017620(dist=25)	CRV2G00017620	Protein of unknown function	GO:0003676;GO:0046872
unitig_818:205546	0.05419	0.01529	0.00992152	0.951974	0.0480256	0.0148773	0.0381041	0.012064	0.0248226	0.0129786	downstream	CRV2G00017630(dist=251)	CRV2G00017630	Protein of unknown function	GO:0003677;GO:0046872
unitig_821:2451422	0.03226	0.01038	0.0080334	0.951964	0.0480362	0.0149002	0.0400028	0.0124761	0.0196098	0.0105233	exonic	CRV2G00008687	CRV2G00008687	Protein of unknown function	GO:0005515
unitig_785:9553	-0.0326	0.01047	0.951897	0.00809065	0.0481026	0.0149232	0.0400119	0.0124952	-0.019735	0.0105762	intergenic	NONE(dist=NONE),CRV2G00019352(dist=13696)	CRV2G00019352	Protein of unknown function	0
unitig_818:63080	0.03812	0.01184	0.00872608	0.951878	0.0481218	0.0149461	0.0393957	0.0123243	0.0214896	0.0112121	downstream	CRV2G00017600(dist=536)	CRV2G00017600	Protein of unknown function	0
unitig_200:25500	0.04564	0.01354	0.00938689	0.951867	0.0481326	0.014969	0.0387457	0.012193	0.0231919	0.0118963	exonic	CRV2G00019727	CRV2G00019727	Protein of unknown function	0
unitig_502:2734	0.02738	0.009075	0.00737239	0.95177	0.0482303	0.0149919	0.0408579	0.012935	0.0174016	0.00947851	intergenic	NONE(dist=NONE),NONE(dist=NONE)		#N/A	#N/A
unitig_793:8071	0.03213	0.01036	0.00811252	0.951486	0.0485137	0.015015	0.0404012	0.0126864	0.0195254	0.0105101	intergenic	CRV2G00016485(dist=7388),CRV2G00016486(dist=3773)	CRV2G00016485	Protein of unknown function	0
unitig_818:344712	0.05656	0.01577	0.0101775	0.951461	0.0485392	0.0150381	0.0383617	0.0121558	0.0252198	0.0133769	downstream	CRV2G00017663(dist=417)	CRV2G00017663	Protein of unknown function	GO:0005524;GO:0016887
scf_005:4718685	0.02863	0.009427	0.00762325	0.951458	0.0485419	0.0150612	0.0409187	0.0129541	0.0180037	0.00981456	intergenic	CRV2G00003316(dist=23422),CRV2G00003317(dist=13700)	CRV2G00003316	Similar to MexAM1_META1p0182 Uncharacterized oxidoreductase MexAM1_META1p0182 (Methylobacterium extorquens (strain ATCC 14718 / DSM 1338 / JCM 2805 / NCIMB 9133 / AM1))	GO:0008152;GO:0016491
scf_014:960393	0.02602	0.008707	0.00723325	0.95134	0.0486597	0.0150843	0.0414265	0.0132207	0.0166657	0.0090643	intronic	CRV2G00012291	CRV2G00012291	Similar to ANKHD1 Ankyrin repeat and KH domain-containing protein 1 (Homo sapiens)	GO:0005515
unitig_126:12192	-0.02975	0.009737	0.951227	0.00783392	0.0487734	0.0151074	0.0409395	0.0129731	-0.0185105	0.0100746	upstream	CRV2G00021344(dist=29)	CRV2G00021344	Similar to FUS6 Efflux pump FUS6 (Gibberella moniliformis (strain M3125 / FGSC 7600))	GO:0055085;GO:0016021
unitig_126:12236	-0.02975	0.009737	0.951227	0.00783392	0.0487734	0.0151306	0.0409395	0.0129922	-0.0185105	0.0100746	exonic	CRV2G00021344	CRV2G00021344	Similar to FUS6 Efflux pump FUS6 (Gibberella moniliformis (strain M3125 / FGSC 7600))	GO:0055085;GO:0016021
unitig_251:16752	0.03068	0.009986	0.00796806	0.951221	0.0487791	0.0151536	0.040811	0.0128778	0.0189173	0.0102621	intergenic	CRV2G00016834(dist=13240),CRV2G00016835(dist=2835)	CRV2G00016834	Protein of unknown function	0
unitig_251:16768	0.03068	0.009986	0.00796806	0.951221	0.0487791	0.0151767	0.040811	0.0128969	0.0189173	0.0102621	intergenic	CRV2G00016834(dist=13256),CRV2G00016835(dist=2819)	CRV2G00016834	Protein of unknown function	0
unitig_643:95044	0.03564	0.01126	0.0086084	0.951175	0.0488248	0.0151998	0.0402164	0.0125144	0.0207199	0.0109769	intergenic	CRV2G00019327(dist=36096),NONE(dist=NONE)	CRV2G00019327	Similar to betA Oxygen-dependent choline dehydrogenase (Burkholderia multivorans (strain ATCC 17616 / 249))	GO:0055114;GO:0050660;GO:0006066;GO:0016614;GO:0008812
unitig_643:95049	0.03564	0.01126	0.0086084	0.951175	0.0488248	0.0152228	0.0402164	0.0125336	0.0207199	0.0109769	intergenic	CRV2G00019327(dist=36101),NONE(dist=NONE)	CRV2G00019327	Similar to betA Oxygen-dependent choline dehydrogenase (Burkholderia multivorans (strain ATCC 17616 / 249))	GO:0055114;GO:0050660;GO:0006066;GO:0016614;GO:0008812
unitig_823:339451	0.0255	0.008569	0.00720664	0.95101	0.0489904	0.0152459	0.0417837	0.0133734	0.0163692	0.0088918	downstream	CRV2G00015609(dist=261)	CRV2G00015609	Similar to CMO Choline monooxygenase, chloroplastic (Beta vulgaris)	GO:0006725;GO:0016708;GO:0019439;GO:0055114;GO:0051537;GO:0005506;GO:0016491
unitig_105:232234	0.02458	0.008317	0.00711292	0.950654	0.0493459	0.0152692	0.0422329	0.0136215	0.0158506	0.0085622	intergenic	CRV2G00018099(dist=17748),CRV2G00018100(dist=13701)	CRV2G00018099	Similar to TIC32 Short-chain dehydrogenase TIC 32, chloroplastic (Arabidopsis thaliana)	GO:0008152;GO:0016491
unitig_747:9756	-0.0402	0.01237	0.950561	0.0092187	0.0494386	0.0152926	0.0402199	0.0125527	-0.0219045	0.011428	downstream	CRV2G00019401(dist=168)	CRV2G00019401	Protein of unknown function	GO:0003676;GO:0003677
unitig_747:9763	-0.0402	0.01237	0.950561	0.0092187	0.0494386	0.0153159	0.0402199	0.0125719	-0.0219045	0.011428	downstream	CRV2G00019401(dist=161)	CRV2G00019401	Protein of unknown function	GO:0003676;GO:0003677
unitig_747:9772	-0.0402	0.01237	0.950561	0.0092187	0.0494386	0.0153392	0.0402199	0.0125909	-0.0219045	0.011428	downstream	CRV2G00019401(dist=152)	CRV2G00019401	Protein of unknown function	GO:0003676;GO:0003677
scf_003:457298	0.02736	0.009103	0.0076068	0.950499	0.0495011	0.0153625	0.0418943	0.0133926	0.0173212	0.00948963	intergenic	CRV2G00007051(dist=61533),CRV2G00007052(dist=2982)	CRV2G00007051	Protein of unknown function	0
unitig_753:46778	0.05027	0.01456	0.0100433	0.950455	0.0495447	0.0153858	0.0395014	0.0123622	0.0239429	0.0124586	exonic	CRV2G00019587	CRV2G00019587	Similar to Kinesin light chain (Doryteuthis pealeii)	GO:0005515
unitig_1:92348	0.03735	0.0117	0.00895441	0.950444	0.049556	0.0154091	0.0406016	0.0127438	0.0211623	0.0111676	exonic	CRV2G00013464	CRV2G00013464	Protein of unknown function	0
unitig_659:17881	0.02689	0.008974	0.00754324	0.950431	0.0495689	0.0154323	0.0420256	0.013488	0.017077	0.00935226	intergenic	CRV2G00019284(dist=2905),CRV2G00019285(dist=6577)	CRV2G00019284	Similar to Kinesin light chain (Doryteuthis pealeii)	GO:0005515
unitig_821:2430849	-0.03475	0.01107	0.950113	0.0087267	0.049887	0.0154558	0.0411603	0.0130685	-0.0203561	0.0108931	intergenic	CRV2G00008684(dist=4121),CRV2G00008685(dist=4742)	CRV2G00008684	Protein of unknown function	0
scf_003:145083	-0.02661	0.008904	0.950112	0.00755633	0.0498878	0.0154792	0.0423315	0.0136977	-0.016915	0.0092706	downstream	CRV2G00006983(dist=15)	CRV2G00006983	Protein of unknown function	0
scf_003:145112	-0.02661	0.008904	0.950112	0.00755633	0.0498878	0.0155026	0.0423315	0.0137167	-0.016915	0.0092706	downstream	CRV2G00006983(dist=44)	CRV2G00006983	Protein of unknown function	0
scf_003:145140	-0.02661	0.008904	0.950112	0.00755633	0.0498878	0.0155259	0.0423315	0.0137356	-0.016915	0.0092706	downstream	CRV2G00006983(dist=72)	CRV2G00006983	Protein of unknown function	0
scf_003:145148	-0.02661	0.008904	0.950112	0.00755633	0.0498878	0.0155492	0.0423315	0.0137546	-0.016915	0.0092706	downstream	CRV2G00006983(dist=80)	CRV2G00006983	Protein of unknown function	0
scf_003:145154	-0.02661	0.008904	0.950112	0.00755633	0.0498878	0.0155725	0.0423315	0.0137735	-0.016915	0.0092706	downstream	CRV2G00006983(dist=86)	CRV2G00006983	Protein of unknown function	0
unitig_818:350785	0.05469	0.01546	0.0104187	0.950037	0.0499632	0.0155958	0.0395445	0.0123811	0.0247216	0.0131001	intergenic	CRV2G00017664(dist=2272),CRV2G00017665(dist=3331)	CRV2G00017664	Protein of unknown function	0
unitig_818:350791	0.05469	0.01546	0.0104187	0.950037	0.0499632	0.0156191	0.0395445	0.0124	0.0247216	0.0131001	intergenic	CRV2G00017664(dist=2278),CRV2G00017665(dist=3325)	CRV2G00017664	Protein of unknown function	0
unitig_21:12975	0.04384	0.01321	0.00966516	0.950025	0.0499754	0.0156423	0.0403102	0.0126482	0.0226627	0.0117678	intergenic	CRV2G00021414(dist=2257),NONE(dist=NONE)	CRV2G00021414	Similar to SEH1 Nucleoporin SEH1 (Chaetomium thermophilum (strain DSM 1495 / CBS 144.50 / IMI 039719))	GO:0005515
